# Supplementary material for: Restricted Gene Flow among Hospital Subpopulations of Enterococcus faecium
Source: PubMed Central journal article supplement — mBio. 2012 Jul 17;3(4):e00151-12. doi: 10.1128/mBio.00151-12 (PMC3413404; doi:10.1128/mbio.00151-12), 2012-07-17
Supplement: mbo004121294st1.pdf [file mbo004121294st1.pdf]

Supplementary Table 1. Meta-data of isolates included in this study

| No | Strain code | ST | BAPS group | BAPS subgroup | country | year | Source                  | Epidemiology   | Species    | isol_site        | esp_gene | ampR | SgrA | EcbA | Genomic island | ST | AtpA | Ddl | Gdh | PurK | Gyd | PstS | Adk |
|----|-------------|----|------------|---------------|---------|------|-------------------------|----------------|------------|------------------|----------|------|------|------|----------------|----|------|-----|-----|------|-----|------|-----|
| 1  | E0172       | 1  | 2          | 3             | NLD     | 1996 | Calf                    | Animal_Calf    | E. faecium | Faeces           | 0        | 0    | 0    | 0    | 0              | 1  | 8    | 4   | 5   | 7    | 1   | 1    | 5   |
| 2  | E0187       | 1  | 2          | 3             | NLD     | 1996 | Calf                    | Animal_Calf    | E. faecium | Faeces           | 0        | 0    | 0    | 0    | 0              | 1  | 8    | 4   | 5   | 7    | 1   | 1    | 5   |
| 3  | E0179       | 2  | 2          | 3             | NLD     | 1996 | Calf                    | Animal_Calf    | E. faecium | Faeces           | 0        | 0    | 0    | 0    | 0              | 2  | 8    | 4   | 5   | 7    | 9   | 1    | 5   |
| 4  | E0200       | 3  | 2          | 3             | NLD     | 1996 | Calf                    | Animal_Calf    | E. faecium | Faeces           | 0        | 0    | 0    | 0    | 0              | 3  | 8    | 4   | 5   | 7    | 1   | 12   | 5   |
| 5  | E0211       | 4  | 2          | 3             | NLD     | 1996 | Calf                    | Animal_Calf    | E. faecium | Faeces           | 0        | 0    | 0    | 0    | 0              | 4  | 8    | 4   | 1   | 3    | 1   | 1    | 5   |
| 6  | A0039       | 4  | 2          | 3             | ITA     |      | Meat                    | Animal_Food    | E. faecium | Food             |          |      |      |      |                | 4  | 8    | 4   | 1   | 3    | 1   | 1    | 5   |
| 7  | E0174       | 4  | 2          | 3             | NLD     | 1996 | Calf                    | Animal_Calf    | E. faecium | Faeces           | 0        | 0    | 0    | 0    | 0              | 4  | 8    | 4   | 1   | 3    | 1   | 1    | 5   |
| 8  | E0185       | 4  | 2          | 3             | NLD     | 1996 | Calf                    | Animal_Calf    | E. faecium | Faeces           | 0        | 0    | 0    | 0    | 0              | 4  | 8    | 4   | 1   | 3    | 1   | 1    | 5   |
| 9  | E0197       | 4  | 2          | 3             | NLD     | 1996 | Calf                    | Animal_Calf    | E. faecium | Faeces           | 0        | 0    | 0    | 0    | 0              | 4  | 8    | 4   | 1   | 3    | 1   | 1    | 5   |
| 10 | E0198       | 4  | 2          | 3             | NLD     | 1996 | Calf                    | Animal_Calf    | E. faecium | Faeces           | 0        | 0    | 0    | 0    | 0              | 4  | 8    | 4   | 1   | 3    | 1   | 1    | 5   |
| 11 | E0209       | 4  | 2          | 3             | NLD     | 1996 | Calf                    | Animal_Calf    | E. faecium | Faeces           | 0        | 0    | 0    | 0    | 0              | 4  | 8    | 4   | 1   | 3    | 1   | 1    | 5   |
| 12 | E0213       | 4  | 2          | 3             | NLD     | 1996 | Calf                    | Animal_Calf    | E. faecium | Faeces           | 0        | 0    | 0    | 0    | 0              | 4  | 8    | 4   | 1   | 3    | 1   | 1    | 5   |
| 13 | E0214       | 4  | 2          | 3             | NLD     | 1996 | Calf                    | Animal_Calf    | E. faecium | Faeces           | 0        | 0    | 0    | 0    | 0              | 4  | 8    | 4   | 1   | 3    | 1   | 1    | 5   |
| 14 | E0226       | 4  | 2          | 3             | NLD     | 1996 | Calf                    | Animal_Calf    | E. faecium | Faeces           | 0        | 0    | 0    | 0    | 0              | 4  | 8    | 4   | 1   | 3    | 1   | 1    | 5   |
| 15 | E1223       | 4  | 2          | 3             | NLD     | 1996 | Calf                    | Animal_Calf    | E. faecium | Faeces           | 0        | 0    | 0    | 0    | 0              | 4  | 8    | 4   | 1   | 3    | 1   | 1    | 5   |
| 16 | E0802       | 5  | 2          | 1             | NLD     | 2000 | Hospitalized patient    | Hosp_Surv      | E. faecium | Faeces           | 0        | 0    | 0    | 0    | 0              | 5  | 5    | 2   | 1   | 9    | 1   | 1    | 5   |
| 17 | E1316       | 5  | 2          | 1             | NLD     | 2000 | Hospitalized patient    | Hosp_Surv      | E. faecium | Blood            | 0        | 0    | 0    | 0    | 0              | 5  | 5    | 2   | 1   | 9    | 1   | 1    | 5   |
| 18 | A1497       | 5  | 2          | 1             | DEU     | 1995 | Hospitalized patient    | Clin_Isol      | E. faecium | blood            | 0        | 0    | 0    | 0    | 0              | 5  | 5    | 2   | 1   | 9    | 1   | 1    | 5   |
| 19 | D0350       | 5  | 2          | 1             | NLD     | 1996 | Pig                     | Animal_pig     | E. faecium | Faeces           | 0        | 0    | 0    | 0    | 0              | 5  | 5    | 2   | 1   | 9    | 1   | 1    | 5   |
| 20 | E0131       | 5  | 2          | 1             | NLD     | 1996 | Non-hospitalized person | Comm_Surv      | E. faecium | Faeces           | 0        | 0    | 0    | 0    | 0              | 5  | 5    | 2   | 1   | 9    | 1   | 1    | 5   |
| 21 | E0151       | 5  | 2          | 1             | NLD     | 1996 | Pig                     | Animal_pig     | E. faecium | Faeces           | 0        | 0    | 0    | 0    | 0              | 5  | 5    | 2   | 1   | 9    | 1   | 1    | 5   |
| 22 | E0688       | 5  | 2          | 1             | ESP     |      | Pig                     | Animal_Pig     | E. faecium | Faeces           | 0        | 0    | 0    | 0    | 0              | 5  | 5    | 2   | 1   | 9    | 1   | 1    | 5   |
| 23 | E0690       | 5  | 2          | 1             | ESP     |      | Pig                     | Animal_Pig     | E. faecium | Faeces           | 0        | 0    | 0    | 0    | 0              | 5  | 5    | 2   | 1   | 9    | 1   | 1    | 5   |
| 24 | E0729       | 5  | 2          | 1             | NLD     | 2000 | Hospitalized patient    | Hosp_Surv      | E. faecium | Faeces           | 0        | 0    | 0    | 0    | 0              | 5  | 5    | 2   | 1   | 9    | 1   | 1    | 5   |
| 25 | E1552       | 5  | 2          | 1             | NLD     | 2002 | Hospitalized patient    | Hosp_Surv      | E. faecium | Faeces           | 0        | 0    | 0    | 0    | 0              | 5  | 5    | 2   | 1   | 9    | 1   | 1    | 5   |
| 26 | E1638       | 5  | 2          | 1             | NLD     |      | Hospitalized patient    | Hosp_Surv      | E. faecium | Faeces           | 0        | 0    | 0    | 0    | 0              | 5  | 5    | 2   | 1   | 9    | 1   | 1    | 5   |
| 27 | E1640       | 5  | 2          | 1             | NLD     |      | Hospitalized patient    | Hosp_Surv      | E. faecium | Faeces           | 0        | 0    | 0    | 0    | 0              | 5  | 5    | 2   | 1   | 9    | 1   | 1    | 5   |
| 28 | E1661       | 5  | 2          | 1             | NLD     | 2002 | Hospitalized patient    | Clin_Isol      | E. faecium | Peritoneal fluid | 0        | 0    | 0    | 0    | 0              | 5  | 5    | 2   | 1   | 9    | 1   | 1    | 5   |
| 29 | E1773       | 5  | 2          | 1             | BEL     | 2001 | Pig                     | Animal_pig     | E. faecium | Faeces           | 0        | 0    | 0    | 0    | 0              | 5  | 5    | 2   | 1   | 9    | 1   | 1    | 5   |
| 30 | E2010       | 5  | 2          | 1             | DEU     | 2000 | Hospitalized patient    |                | E. faecium | WA               |          |      |      |      |                | 5  | 5    | 2   | 1   | 9    | 1   | 1    | 5   |
| 31 | E2069       | 5  | 2          | 1             | DNK     | 2001 | Pig                     | Animal_pig     | E. faecium |                  | 1        |      |      |      |                | 5  | 5    | 2   | 1   | 9    | 1   | 1    | 5   |
| 32 | E0135       | 6  | 3          | 2             | NLD     | 1996 | Non-hospitalized person | Comm_Surv      | E. faecium | Faeces           | 0        | 0    | 0    | 0    | 0              | 6  | 4    | 2   | 1   | 9    | 1   | 1    | 5   |
| 33 | E0144       | 6  | 3          | 2             | NLD     | 1996 | Pig                     | Animal_pig     | E. faecium | Faeces           | 0        | 0    | 0    | 0    | 0              | 6  | 4    | 2   | 1   | 9    | 1   | 1    | 5   |
| 34 | E1149       | 6  | 3          | 2             | NLD     | 1995 | Hospitalized patient    | Hosp_Surv      | E. faecium | Faeces           | 0        | 0    | 0    | 0    | 0              | 6  | 4    | 2   | 1   | 9    | 1   | 1    | 5   |
| 35 | E1764       | 6  | 3          | 2             | BEL     | 1996 | Non-hospitalized person | Comm_Surv      | E. faecium | Faeces           | 0        | 0    | 0    | 0    | 0              | 6  | 4    | 2   | 1   | 9    | 1   | 1    | 5   |
| 36 | A2185       | 6  | 3          | 2             |         |      | Pig                     | Animal_Pig     | E. faecium | Faeces           |          |      |      |      |                | 6  | 4    | 2   | 1   | 9    | 1   | 1    | 5   |
| 37 | D0158       | 6  | 3          | 2             | NLD     | 1999 | Hospitalized patient    | Hosp_Surv      | E. faecium | Faeces           | 0        | 0    | 0    | 0    | 0              | 6  | 4    | 2   | 1   | 9    | 1   | 1    | 5   |
| 38 | E0029       | 6  | 3          | 2             | GBR     | 1992 | Pig                     | Animal_pig     | E. faecium | Faeces           | 0        | 0    | 0    | 0    | 0              | 6  | 4    | 2   | 1   | 9    | 1   | 1    | 5   |
| 39 | E0092       | 6  | 3          | 2             | NLD     | 1997 | Non-hospitalized person | Comm_Surv      | E. faecium | Faeces           | 0        | 0    | 0    | 0    | 0              | 6  | 4    | 2   | 1   | 9    | 1   | 1    | 5   |
| 40 | E0129       | 6  | 3          | 2             | NLD     | 1996 | Non-hospitalized person | Comm_Surv      | E. faecium | Faeces           | 0        | 0    | 0    | 0    | 0              | 6  | 4    | 2   | 1   | 9    | 1   | 1    | 5   |
| 41 | E0130       | 6  | 3          | 2             | NLD     | 1996 | Non-hospitalized person | Comm_Surv      | E. faecium | Faeces           | 0        | 0    | 0    | 0    | 0              | 6  | 4    | 2   | 1   | 9    | 1   | 1    | 5   |
| 42 | E0138       | 6  | 3          | 2             | NLD     | 1996 | Non-hospitalized person | Comm_Surv      | E. faecium | Faeces           | 0        | 0    | 0    | 0    | 0              | 6  | 4    | 2   | 1   | 9    | 1   | 1    | 5   |
| 43 | E0139       | 6  | 3          | 2             | NLD     | 1996 | Non-hospitalized person | Comm_Surv      | E. faecium | Faeces           | 0        | 0    | 0    | 0    | 0              | 6  | 4    | 2   | 1   | 9    | 1   | 1    | 5   |
| 44 | E0142       | 6  | 3          | 2             | NLD     | 1996 | Pig                     | Animal_pig     | E. faecium | Faeces           | 0        | 0    | 0    | 0    | 0              | 6  | 4    | 2   | 1   | 9    | 1   | 1    | 5   |
| 45 | E0149       | 6  | 3          | 2             | NLD     | 1996 | Pig                     | Animal_pig     | E. faecium | Faeces           | 0        | 0    | 0    | 0    | 0              | 6  | 4    | 2   | 1   | 9    | 1   | 1    | 5   |
| 46 | E0150       | 6  | 3          | 2             | NLD     | 1996 | Pig                     | Animal_pig     | E. faecium | Faeces           | 0        | 0    | 0    | 0    | 0              | 6  | 4    | 2   | 1   | 9    | 1   | 1    | 5   |
| 47 | E0767       | 6  | 3          | 2             | NLD     | 2000 | Hospitalized patient    | Hosp_Surv      | E. faecium | Faeces           | 0        | 0    | 0    | 0    | 0              | 6  | 4    | 2   | 1   | 9    | 1   | 1    | 5   |
| 48 | E0808       | 6  | 3          | 2             | NLD     | 2000 | Hospitalized patient    | Hosp_Surv      | E. faecium | Faeces           | 0        | 0    | 0    | 0    | 0              | 6  | 4    | 2   | 1   | 9    | 1   | 1    | 5   |
| 49 | E1374       | 6  | 3          | 2             | NLD     | 2001 | Hospitalized patient    | Hosp_Surv      | E. faecium | Faeces           | 0        | 0    | 0    | 0    | 0              | 6  | 4    | 2   | 1   | 9    | 1   | 1    | 5   |
| 50 | E1637       | 6  | 3          | 2             | NLD     |      |                         | Hosp_Surv      | E. faecium |                  |          |      |      |      |                | 6  | 4    | 2   | 1   | 9    | 1   | 1    | 5   |
| 51 | E0403       | 7  | 3          | 2             | NLD     | 1997 | Poultry farmer          | Comm_Surv      | E. faecium | Faeces           | 0        | 0    | 0    | 0    | 0              | 7  | 4    | 2   | 1   | 2    | 1   | 1    | 5   |
| 52 | E0429       | 8  | 2          | 1             | NLD     | 1997 | Poultry                 | Animal_Poultry | E. faecium | Faeces           | 0        | 0    | 0    | 0    | 0              | 8  | 5    | 2   | 1   | 6    | 1   | 7    | 1   |
| 53 | A1045       | 8  | 2          | 1             | DEU     | 1992 | Hospitalized patient    |                | E. faecium |                  |          |      |      |      |                | 8  | 5    | 2   | 1   | 6    | 1   | 7    | 1   |
| 54 | A2200       | 8  | 2          | 1             |         |      | Poultry                 | Animal_Poultry | E. faecium | Faeces           |          |      |      |      |                | 8  | 5    | 2   | 1   | 6    | 1   | 7    | 1   |
| 55 | E0449       | 8  | 2          | 1             | NLD     | 1997 | Poultry                 | Animal_Poultry | E. faecium | Faeces           | 0        | 0    | 0    | 0    | 0              | 8  | 5    | 2   | 1   | 6    | 1   | 7    | 1   |
| 56 | E0453       | 8  | 2          | 1             | NLD     | 1997 | Poultry                 | Animal_Poultry | E. faecium | Faeces           | 0        | 0    | 0    | 0    | 0              | 8  | 5    | 2   | 1   | 6    | 1   | 7    | 1   |
| 57 | E0457       | 8  | 2          | 1             | NLD     | 1997 | Poultry                 | Animal_Poultry | E. faecium | Faeces           | 0        | 0    | 0    | 0    | 0              | 8  | 5    | 2   | 1   | 6    | 1   | 7    | 1   |
| 58 | E0045       | 9  | 2          | 1             | GBR     | 1992 | Poultry                 | Animal_Poultry | E. faecium | Faeces           | 0        | 0    | 0    | 0    | 0              | 9  | 5    | 2   | 6   | 6    | 1   | 7    | 1   |
| 59 | A0859       | 9  | 2          | 1             | DEU     | 1998 | Poultry                 | Animal_poultry | E. faecium | chicken faeces   |          |      |      |      |                | 9  | 5    | 2   | 6   | 6    | 1   | 7    | 1   |
| 60 | A1530       | 9  | 2          | 1             | DEU     | 2000 | Hospitalized patient    | Clin_Isol      | E. faecium | blood            | 0        | 1    |      |      |                | 9  | 5    | 2   | 6   | 6    | 1   | 7    | 1   |
| 61 | A1596       | 9  | 2          | 1             | DEU     | 2006 | Hospitalized patient    | Clin_Isol      | E. faecium | blood            | 0        | 0    |      |      |                | 9  | 5    | 2   | 6   | 6    | 1   | 7    | 1   |
| 62 | A1744       | 9  | 2          | 1             | USA     | 2005 |                         |                | E. faecium |                  |          |      |      |      |                | 9  | 5    | 2   | 6   | 6    | 1   | 7    | 1   |
| 63 | A1749       | 9  | 2          | 1             | USA     | 2005 |                         |                | E. faecium |                  |          |      |      |      |                | 9  | 5    | 2   | 6   | 6    | 1   | 7    | 1   |

Supplementary Table 1. Meta-data of isolates included in this study

| No  | Strain code   | ST | BAPS group | BAPS subgroup | country | year | Source               | Epidemiology             | Species    | Isol_site        | esp_gene | ampR | SgrA | EcbA | Genomic island | ST | AtpA | Ddl | Gdh | PurK | Gyd | PstS | Adk |
|-----|---------------|----|------------|---------------|---------|------|----------------------|--------------------------|------------|------------------|----------|------|------|------|----------------|----|------|-----|-----|------|-----|------|-----|
| 64  | A1753         | 9  | 2          |               | 1 USA   | 2005 |                      |                          | E. faecium |                  |          |      |      |      | 9              | 5  | 2    | 6   | 6   | 1    | 7   | 1    |     |
| 65  | A1776         | 9  | 2          |               | 1 USA   | 2005 |                      |                          | E. faecium |                  |          |      |      |      | 9              | 5  | 2    | 6   | 6   | 1    | 7   | 1    |     |
| 66  | A1778         | 9  | 2          |               | 1 USA   | 2005 |                      |                          | E. faecium |                  |          |      |      |      | 9              | 5  | 2    | 6   | 6   | 1    | 7   | 1    |     |
| 67  | E0269         | 9  | 2          |               | 1 NLD   | 1996 | Poultry              | Animal_Poultry           | E. faecium | Faeces           | 0        | 0    |      |      | 9              | 5  | 2    | 6   | 6   | 1    | 7   | 1    |     |
| 68  | E0278         | 9  | 2          |               | 1 NLD   | 1996 | Poultry farmer       | Comm_Surv                | E. faecium | Faeces           | 0        | 0    | 0    | 0    | 0              | 9  | 5    | 2   | 6   | 6    | 1   | 7    | 1   |
| 69  | E4130         | 9  | 2          |               | 1 GBR   | 1982 | Hospitalized patient | Clin_Isol                | E. faecium | Blood            | 0        | 1    |      |      | 9              | 5  | 2    | 6   | 6   | 1    | 7   | 1    |     |
| 70  | E4132         | 9  | 2          |               | 1 GBR   | 1985 | Hospitalized patient | Clin_Isol                | E. faecium | Blood            | 0        | 1    |      |      | 9              | 5  | 2    | 6   | 6   | 1    | 7   | 1    |     |
| 71  | A0035         | 10 | 2          |               | 1 ITA   |      | Animal               | Animal                   | E. faecium |                  |          |      |      |      | 10             | 5  | 2    | 1   | 6   | 1    | 1   | 1    |     |
| 72  | A0036         | 10 | 2          |               | 1 ITA   |      | Animal               | Animal                   | E. faecium |                  |          |      |      |      | 10             | 5  | 2    | 1   | 6   | 1    | 1   | 1    |     |
| 73  | A1745         | 10 | 2          |               | 1 USA   | 2005 |                      |                          | E. faecium |                  |          |      |      |      | 10             | 5  | 2    | 1   | 6   | 1    | 1   | 1    |     |
| 74  | A1750         | 10 | 2          |               | 1 USA   | 2005 |                      |                          | E. faecium |                  |          |      |      |      | 10             | 5  | 2    | 1   | 6   | 1    | 1   | 1    |     |
| 75  | A1752         | 10 | 2          |               | 1 USA   | 2005 |                      |                          | E. faecium |                  |          |      |      |      | 10             | 5  | 2    | 1   | 6   | 1    | 1   | 1    |     |
| 76  | A1775         | 10 | 2          |               | 1 USA   | 2005 |                      |                          | E. faecium |                  |          |      |      |      | 10             | 5  | 2    | 1   | 6   | 1    | 1   | 1    |     |
| 77  | E0454         | 10 | 2          |               | 1 NLD   | 1997 | Poultry              | Animal_Poultry           | E. faecium | Faeces           | 0        | 0    |      |      | 10             | 5  | 2    | 1   | 6   | 1    | 1   | 1    |     |
| 78  | E0674         | 10 | 2          |               | 1 ESP   |      | Poultry              | Animal_Poultry           | E. faecium | Faeces           | 0        | 0    |      |      | 10             | 5  | 2    | 1   | 6   | 1    | 1   | 1    |     |
| 79  | W-5586/TX2008 | 10 | 2          |               | 1 USA   | 1986 | Hospitalized patient |                          | E. faecium |                  | 1        |      |      |      | 10             | 5  | 2    | 1   | 6   | 1    | 1   | 1    |     |
| 80  | E0452         | 11 | 2          |               | 1 NLD   | 1997 | Poultry              | Animal_Poultry           | E. faecium | Faeces           | 0        | 0    |      |      | 11             | 5  | 2    | 7   | 6   | 1    | 1   | 1    |     |
| 81  | E0451         | 12 | 2          |               | 1 NLD   | 1997 | Poultry              | Animal_Poultry           | E. faecium | Faeces           | 0        | 1    |      |      | 12             | 5  | 2    | 6   | 6   | 1    | 1   | 1    |     |
| 82  | E2134         | 12 | 2          |               | 1 NLD   | 2004 | Poultry              | Animal_Poultry           | E. faecium |                  | 1        |      |      |      | 12             | 5  | 2    | 6   | 6   | 1    | 1   | 1    |     |
| 83  | E0446         | 13 | 2          |               | 1 NLD   | 1997 | Poultry              | Animal_Poultry           | E. faecium | Faeces           | 0        | 0    |      |      | 13             | 9  | 2    | 1   | 6   | 7    | 7   | 1    |     |
| 84  | E0447         | 13 | 2          |               | 1 NLD   | 1997 | Poultry              | Animal_Poultry           | E. faecium | Faeces           | 0        | 0    |      |      | 13             | 9  | 2    | 1   | 6   | 7    | 7   | 1    |     |
| 85  | E0455         | 13 | 2          |               | 1 NLD   | 1997 | Poultry              | Animal_Poultry           | E. faecium | Faeces           | 0        | 0    |      |      | 13             | 9  | 2    | 1   | 6   | 7    | 7   | 1    |     |
| 86  | E4197         | 13 | 2          |               | 1 SWE   | 2000 | Poultry              | Animal_Poultry           | E. faecium |                  |          |      |      |      | 13             | 9  | 2    | 1   | 6   | 7    | 7   | 1    |     |
| 87  | E0450         | 14 | 2          |               | 1 NLD   | 1997 | Poultry              | Animal_Poultry           | E. faecium | Faeces           | 0        | 0    |      |      | 14             | 9  | 2    | 7   | 6   | 1    | 7   | 1    |     |
| 88  | E0400         | 15 | 2          |               | 1 NLD   | 1997 | Poultry farmer       | Comm_Surv                | E. faecium | Faeces           | 0        | 0    | 0    | 0    | 0              | 15 | 9    | 2   | 7   | 9    | 1   | 7    | 4   |
| 89  | E0470         | 16 | 3          |               | 3 NLD   | 1999 | Hospitalized patient | Hospital outbreak NL-3-1 | E. faecium |                  | 1        | 1    | 1    | 1    | 1              | 16 | 1    | 2   | 1   | 1    | 1   | 1    | 1   |
| 90  | E0734         | 16 | 3          |               | 3 NLD   | 2000 | Environment          | Hospital outbreak NL-1-1 | E. faecium | Environment      | 1        | 1    | 1    | 1    | 1              | 16 | 1    | 2   | 1   | 1    | 1   | 1    | 1   |
| 91  | E0745         | 16 | 3          |               | 3 NLD   | 2000 | Hospitalized patient | Hospital outbreak NL-2-1 | E. faecium | Faeces           | 1        | 1    | 1    | 1    | 1              | 16 | 1    | 2   | 1   | 1    | 1   | 1    | 1   |
| 92  | E1132         | 16 | 3          |               | 3 USA   | 2001 | Hospitalized patient | Hospital outbreak US-3   | E. faecium | Faeces           | 1        | 1    | 1    | 1    | 1              | 16 | 1    | 2   | 1   | 1    | 1   | 1    | 1   |
| 93  | E1147         | 16 | 3          |               | 3 NLD   | 1998 | Hospitalized patient | Hosp_Surv                | E. faecium | Faeces           | 1        | 1    | 1    | 1    | 1              | 16 | 1    | 2   | 1   | 1    | 1   | 1    | 1   |
| 94  | E1391         | 16 | 3          |               | 3 GBR   | 2000 | Hospitalized patient | Clin_Isol                | E. faecium |                  | 1        | 1    | 0    | 1    | 1              | 16 | 1    | 2   | 1   | 1    | 1   | 1    | 1   |
| 95  | E1441         | 16 | 3          |               | 3 GRC   | 2000 | Hospitalized patient | Hospital outbreak GR-1   | E. faecium | Peritoneal fluid | 1        | 1    | 1    | 1    | 1              | 16 | 1    | 2   | 1   | 1    | 1   | 1    | 1   |
| 96  | E1735         | 16 | 3          |               | 3 ESP   | 2001 | Hospitalized patient | Clin_Isol                | E. faecium | Blood            | 1        | 1    | 1    | 1    | 1              | 16 | 1    | 2   | 1   | 1    | 1   | 1    | 1   |
| 97  | E0161         | 16 | 3          |               | 3 USA   | 1995 | Hospitalized patient | Hospital outbreak US-2-1 | E. faecium | Faeces           | 1        | 1    | 1    | 1    | 1              | 16 | 1    | 2   | 1   | 1    | 1   | 1    | 1   |
| 98  | E1360         | 16 | 3          |               | 3 USA   | 2001 | Hospitalized patient | Clin_Isol                | E. faecium |                  | 1        | 1    | 1    | 1    | 1              | 16 | 1    | 2   | 1   | 1    | 1   | 1    | 1   |
| 99  | A0860         | 16 | 3          |               | 3 DEU   | 2004 | Hospitalized patient | Clin_Isol                | E. faecium | ascites          | 1        | 1    |      |      | 16             | 1  | 2    | 1   | 1   | 1    | 1   | 1    | 1   |
| 100 | A0861         | 16 | 3          |               | 3 DEU   | 2004 | Hospitalized patient | Clin_Isol                | E. faecium | urine            | 1        | 1    |      |      | 16             | 1  | 2    | 1   | 1   | 1    | 1   | 1    | 1   |
| 101 | A1014         | 16 | 3          |               | 3 DEU   | 2004 | Hospitalized patient |                          | E. faecium |                  |          |      |      |      | 16             | 1  | 2    | 1   | 1   | 1    | 1   | 1    | 1   |
| 102 | A1026         | 16 | 3          |               | 3 DEU   | 2004 | Hospitalized patient | Clin_Isol                | E. faecium | urine            | 1        | 1    |      |      | 16             | 1  | 2    | 1   | 1   | 1    | 1   | 1    | 1   |
| 103 | A1509         | 16 | 3          |               | 3 DEU   | 1998 | Hospitalized patient | Clin_Isol                | E. faecium | blood            | 1        | 1    |      |      | 16             | 1  | 2    | 1   | 1   | 1    | 1   | 1    | 1   |
| 104 | A1833         | 16 | 3          |               | 3 SWE   |      | Hospitalized patient | Clin_Isol                | E. faecium | Blood            | 1        | 1    |      |      | 16             | 1  | 2    | 1   | 1   | 1    | 1   | 1    | 1   |
| 105 | E0158         | 16 | 3          |               | 3 USA   | 1995 | Hospitalized patient | Hospital outbreak US-2-2 | E. faecium | Faeces           | 1        | 1    |      |      | 16             | 1  | 2    | 1   | 1   | 1    | 1   | 1    | 1   |
| 106 | E0473         | 16 | 3          |               | 3 NLD   | 1999 | Hospitalized patient | Hospital outbreak NL-3-2 | E. faecium |                  | 1        | 1    |      |      | 16             | 1  | 2    | 1   | 1   | 1    | 1   | 1    | 1   |
| 107 | E0481         | 16 | 3          |               | 3 NLD   | 1999 | Hospitalized patient | Hospital outbreak NL-3-1 | E. faecium |                  | 1        | 1    |      |      | 16             | 1  | 2    | 1   | 1   | 1    | 1   | 1    | 1   |
| 108 | E0487         | 16 | 3          |               | 3 NLD   | 1999 | Hospitalized patient | Hospital outbreak NL-3-1 | E. faecium |                  | 1        | 1    |      |      | 16             | 1  | 2    | 1   | 1   | 1    | 1   | 1    | 1   |
| 109 | E0706         | 16 | 3          |               | 3 NLD   | 2000 | Hospitalized patient | Hospital outbreak NL-1-1 | E. faecium | Catheter         | 1        | 1    |      |      | 16             | 1  | 2    | 1   | 1   | 1    | 1   | 1    | 1   |
| 110 | E0707         | 16 | 3          |               | 3 NLD   | 2000 | Hospitalized patient | Hospital outbreak NL-1-1 | E. faecium | Urine            | 1        | 1    |      |      | 16             | 1  | 2    | 1   | 1   | 1    | 1   | 1    | 1   |
| 111 | E0713         | 16 | 3          |               | 3 NLD   | 2000 | Hospitalized patient | Hospital outbreak NL-1-1 | E. faecium | Faeces           | 1        | 1    |      |      | 16             | 1  | 2    | 1   | 1   | 1    | 1   | 1    | 1   |
| 112 | E0714         | 16 | 3          |               | 3 NLD   | 2000 | Hospitalized patient | Hospital outbreak NL-1-1 | E. faecium | Faeces           | 1        | 1    |      |      | 16             | 1  | 2    | 1   | 1   | 1    | 1   | 1    | 1   |
| 113 | E0715         | 16 | 3          |               | 3 NLD   | 2000 | Hospitalized patient | Hospital outbreak NL-1-1 | E. faecium | Faeces           | 1        | 1    |      |      | 16             | 1  | 2    | 1   | 1   | 1    | 1   | 1    | 1   |
| 114 | E0736         | 16 | 3          |               | 3 NLD   | 2000 | Hospitalized patient | Hospital outbreak NL-1-1 | E. faecium | Faeces           | 1        | 1    |      |      | 16             | 1  | 2    | 1   | 1   | 1    | 1   | 1    | 1   |
| 115 | E0752         | 16 | 3          |               | 3 NLD   | 2000 | Hospitalized patient | Hospital outbreak NL-2-1 | E. faecium | Faeces           | 1        | 1    |      |      | 16             | 1  | 2    | 1   | 1   | 1    | 1   | 1    | 1   |
| 116 | E0758         | 16 | 3          |               | 3 NLD   | 2000 | Hospitalized patient | Hospital outbreak NL-2-1 | E. faecium | Faeces           | 1        | 1    |      |      | 16             | 1  | 2    | 1   | 1   | 1    | 1   | 1    | 1   |
| 117 | E0770         | 16 | 3          |               | 3 NLD   | 2000 | Hospitalized patient | Hospital outbreak NL-2-1 | E. faecium | Faeces           | 1        | 1    |      |      | 16             | 1  | 2    | 1   | 1   | 1    | 1   | 1    | 1   |
| 118 | E0779         | 16 | 3          |               | 3 NLD   | 2000 | Hospitalized patient | Hospital outbreak NL-2-1 | E. faecium | Faeces           | 1        | 1    |      |      | 16             | 1  | 2    | 1   | 1   | 1    | 1   | 1    | 1   |
| 119 | E0805         | 16 | 3          |               | 3 NLD   | 2000 | Hospitalized patient | Hospital outbreak NL-2-1 | E. faecium | Faeces           | 1        | 1    |      |      | 16             | 1  | 2    | 1   | 1   | 1    | 1   | 1    | 1   |
| 120 | E1134         | 16 | 3          |               | 3 USA   | 2001 | Hospitalized patient | Hospital outbreak US-3   | E. faecium | Faeces           | 1        | 1    |      |      | 16             | 1  | 2    | 1   | 1   | 1    | 1   | 1    | 1   |
| 121 | E1135         | 16 | 3          |               | 3 USA   | 2001 | Hospitalized patient | Hospital outbreak US-3   | E. faecium | Faeces           | 1        | 1    |      |      | 16             | 1  | 2    | 1   | 1   | 1    | 1   | 1    | 1   |
| 122 | E1136         | 16 | 3          |               | 3 USA   | 2001 | Hospitalized patient | Hospital outbreak US-3   | E. faecium |                  | 1        | 1    |      |      | 16             | 1  | 2    | 1   | 1   | 1    | 1   | 1    | 1   |
| 123 | E1137         | 16 | 3          |               | 3 USA   | 2001 | Hospitalized patient | Hospital outbreak US-3   | E. faecium |                  | 1        | 1    |      |      | 16             | 1  | 2    | 1   | 1   | 1    | 1   | 1    | 1   |
| 124 | E1148         | 16 | 3          |               | 3 NLD   | 1998 | Hospitalized patient | Hosp_Surv                | E. faecium | Faeces           | 1        | 1    |      |      | 16             | 1  | 2    | 1   | 1   | 1    | 1   | 1    | 1   |
| 125 | E1219         | 16 | 3          |               | 3 NLD   | 2001 | Hospitalized patient | Hospital outbreak NL-1-1 | E. faecium | Faeces           | 1        | 1    |      |      | 16             | 1  | 2    | 1   | 1   | 1    | 1   | 1    | 1   |
| 126 | E1315         | 16 | 3          |               | 3 NLD   | 2000 | Hospitalized patient | Clin_Isol                | E. faecium | Trauma           | 1        | 1    |      |      | 16             | 1  | 2    | 1   | 1   | 1    | 1   | 1    | 1   |

Supplementary Table 1. Meta-data of isolates included in this study

| No  | Strain code  | ST | BAPS group | BAPS subgroup | country | year      | Source                  | Epidemiology                  | Species    | Isol_site     | esp_gene | ampR | SgrA | EcbA | Genomic island | ST | AtpA | Ddl | Gdh | PurK | Gyd | PstS | Adk |
|-----|--------------|----|------------|---------------|---------|-----------|-------------------------|-------------------------------|------------|---------------|----------|------|------|------|----------------|----|------|-----|-----|------|-----|------|-----|
| 127 | E1361        | 16 | 3          |               | USA     | 2001      | Hospitalized patient    | Clin_Isol                     | E. faecium |               | 1        | 1    |      |      |                | 16 | 1    | 2   | 1   | 1    | 1   | 1    | 1   |
| 128 | E1362        | 16 | 3          |               | USA     | 2001      | Hospitalized patient    | Clin_Isol                     | E. faecium |               | 1        | 1    |      |      |                | 16 | 1    | 2   | 1   | 1    | 1   | 1    | 1   |
| 129 | E1363        | 16 | 3          |               | USA     | 2001      | Hospitalized patient    | Clin_Isol                     | E. faecium |               | 1        | 1    |      |      |                | 16 | 1    | 2   | 1   | 1    | 1   | 1    | 1   |
| 130 | E1364        | 16 | 3          |               | USA     | 2001      | Hospitalized patient    | Clin_Isol                     | E. faecium |               | 1        | 1    |      |      |                | 16 | 1    | 2   | 1   | 1    | 1   | 1    | 1   |
| 131 | E1425        | 16 | 3          |               | GBR     | 2000      | Hospitalized patient    | Clin_Isol                     | E. faecium |               | 1        | 1    |      |      |                | 16 | 1    | 2   | 1   | 1    | 1   | 1    | 1   |
| 132 | E1446        | 16 | 3          |               | GRC     | 2000      | Hospitalized patient    | Hospital outbreak GR-1        | E. faecium | Urine         | 1        | 1    |      |      |                | 16 | 1    | 2   | 1   | 1    | 1   | 1    | 1   |
| 133 | E1526        | 16 | 3          |               | NLD     | 2002      | Hospitalized patient    | Hospital outbreak NL-1-1      | E. faecium | Urine         | 1        | 1    |      |      |                | 16 | 1    | 2   | 1   | 1    | 1   | 1    | 1   |
| 134 | E1531        | 16 | 3          |               | GBR     |           | Hospitalized patient    | Clin_Isol                     | E. faecium | nd            | 1        | 1    |      |      |                | 16 | 1    | 2   | 1   | 1    | 1   | 1    | 1   |
| 135 | E1532        | 16 | 3          |               | GBR     |           | Hospitalized patient    | Clin_Isol                     | E. faecium | nd            | 1        | 1    |      |      |                | 16 | 1    | 2   | 1   | 1    | 1   | 1    | 1   |
| 136 | E1550        | 16 | 3          |               | NLD     | 2002      | Hospitalized patient    | Hospital outbreak NL-1-1      | E. faecium | Blood         | 1        | 1    |      |      |                | 16 | 1    | 2   | 1   | 1    | 1   | 1    | 1   |
| 137 | E1556        | 16 | 3          |               | NLD     | 2002      | Hospitalized patient    | Hosp_Surv                     | E. faecium | Faeces        | 1        | 1    |      |      |                | 16 | 1    | 2   | 1   | 1    | 1   | 1    | 1   |
| 138 | E1651        | 16 | 3          |               | NLD     | 2002      | Hospitalized patient    | Hospital outbreak NL-1-1      | E. faecium | Wound         | 1        | 1    |      |      |                | 16 | 1    | 2   | 1   | 1    | 1   | 1    | 1   |
| 139 | E1656        | 16 | 3          |               | NLD     | 2002      | Hospitalized patient    | Hospital outbreak NL-1-1      | E. faecium | Faeces        | 1        | 1    |      |      |                | 16 | 1    | 2   | 1   | 1    | 1   | 1    | 1   |
| 140 | E1660        | 16 | 3          |               | NLD     | 2002      | Hospitalized patient    | Hospital outbreak NL-1-1      | E. faecium | Faeces        | 1        | 1    |      |      |                | 16 | 1    | 2   | 1   | 1    | 1   | 1    | 1   |
| 141 | E1973        | 16 | 3          |               | DEU     | 2001      | Hospitalized patient    |                               | E. faecium | Urine         | 1        | 1    |      |      |                | 16 | 1    | 2   | 1   | 1    | 1   | 1    | 1   |
| 142 | E1986        | 16 | 3          |               | DEU     | 2000      | Hospitalized patient    |                               | E. faecium | WA            | 1        | 1    |      |      |                | 16 | 1    | 2   | 1   | 1    | 1   | 1    | 1   |
| 143 | E1990        | 16 | 3          |               | DEU     | 2001      | Hospitalized patient    |                               | E. faecium | DK-Urin       | 1        | 1    |      |      |                | 16 | 1    | 2   | 1   | 1    | 1   | 1    | 1   |
| 144 | E1993        | 16 | 3          |               | DEU     | 2001      | Hospitalized patient    |                               | E. faecium | WA            | 1        | 1    |      |      |                | 16 | 1    | 2   | 1   | 1    | 1   | 1    | 1   |
| 145 | E2014        | 16 | 3          |               | DEU     | 2000      | Hospitalized patient    |                               | E. faecium | K-Urin        | 1        | 1    |      |      |                | 16 | 1    | 2   | 1   | 1    | 1   | 1    | 1   |
| 146 | E2016        | 16 | 3          |               | DEU     | 2000      | Hospitalized patient    |                               | E. faecium | K-Urin        | 1        | 1    |      |      |                | 16 | 1    | 2   | 1   | 1    | 1   | 1    | 1   |
| 147 | E2023        | 16 | 3          |               | DEU     | 2001      | Hospitalized patient    |                               | E. faecium | K-Spitz       | 1        | 1    |      |      |                | 16 | 1    | 2   | 1   | 1    | 1   | 1    | 1   |
| 148 | E2024        | 16 | 3          |               | DEU     | 2001      | Hospitalized patient    |                               | E. faecium | Urin          | 1        | 1    |      |      |                | 16 | 1    | 2   | 1   | 1    | 1   | 1    | 1   |
| 149 | E2026        | 16 | 3          |               | DEU     | 2000      | Hospitalized patient    |                               | E. faecium | DK-Urin       | 1        | 1    |      |      |                | 16 | 1    | 2   | 1   | 1    | 1   | 1    | 1   |
| 150 | E2027        | 16 | 3          |               | DEU     | 2000      | Hospitalized patient    |                               | E. faecium | WA            | 1        | 1    |      |      |                | 16 | 1    | 2   | 1   | 1    | 1   | 1    | 1   |
| 151 | E2038        | 16 | 3          |               | DEU     | 2000      | Hospitalized patient    | Clin_Isol                     | E. faecium | WA            | 1        | 1    |      |      |                | 16 | 1    | 2   | 1   | 1    | 1   | 1    | 1   |
| 152 | E2480        | 16 | 3          |               | USA     | 1996      | Hospitalized patient    | Hospital outbreak US-4        | E. faecium | Faeces        | 1        | 1    |      |      |                | 16 | 1    | 2   | 1   | 1    | 1   | 1    | 1   |
| 153 | E3193        | 16 | 3          |               | NLD     | 1996      | Hospitalized patient    | Clin_Isol                     | E. faecium | Blood         | 1        | 1    |      |      |                | 16 | 1    | 2   | 1   | 1    | 1   | 1    | 1   |
| 154 | E4456        | 16 | 3          |               | NLD     | 2008      | Dog                     | Animal_Dog                    | E. faecium | Faeces        | 1        | 1    |      |      |                | 16 | 1    | 2   | 1   | 1    | 1   | 1    | 1   |
| 155 | FA280/TX2025 | 16 | 3          |               | USA     | 1988      | Hospitalized patient    |                               |            |               | 1        | 1    |      |      |                | 16 | 1    | 2   | 1   | 1    | 1   | 1    | 1   |
| 156 | FA287/TX2024 | 16 | 3          |               | USA     | 1988      | Hospitalized patient    |                               |            |               | 1        | 1    |      |      |                | 16 | 1    | 2   | 1   | 1    | 1   | 1    | 1   |
| 157 | FA295/TX2023 | 16 | 3          |               | USA     | 1988      | Hospitalized patient    |                               |            |               | 1        | 1    |      |      |                | 16 | 1    | 2   | 1   | 1    | 1   | 1    | 1   |
| 158 | SH-11/TX2436 | 16 | 3          |               | USA     | 1990-1991 | Hospitalized patient    |                               |            |               | 1        | 1    |      |      |                | 16 | 1    | 2   | 1   | 1    | 1   | 1    | 1   |
| 159 | SH-13/TX2438 | 16 | 3          |               | USA     | 1990-1991 | Hospitalized patient    |                               |            |               | 1        | 1    |      |      |                | 16 | 1    | 2   | 1   | 1    | 1   | 1    | 1   |
| 160 | SH-14/TX2439 | 16 | 3          |               | USA     | 1990-1991 | Hospitalized patient    |                               |            |               | 1        | 1    |      |      |                | 16 | 1    | 2   | 1   | 1    | 1   | 1    | 1   |
| 161 | SH-6/TX2431  | 16 | 3          |               | USA     | 1990-1991 | Hospitalized patient    |                               |            |               | 1        | 1    |      |      |                | 16 | 1    | 2   | 1   | 1    | 1   | 1    | 1   |
| 162 | SH-9/TX2434  | 16 | 3          |               | USA     | 1990-1991 | Hospitalized patient    |                               |            |               | 1        | 1    |      |      |                | 16 | 1    | 2   | 1   | 1    | 1   | 1    | 1   |
| 163 | U0012        | 16 | 3          |               | NLD     | 2000      | Hospitalized patient    | Clin_Isol                     | E. faecium | Wound         | 1        | 1    |      |      |                | 16 | 1    | 2   | 1   | 1    | 1   | 1    | 1   |
| 164 | U0063        | 16 | 3          |               | NLD     | 2003      | Hospitalized patient    | Clin_Isol                     | E. faecium | Wound         | 1        | 1    |      |      |                | 16 | 1    | 2   | 1   | 1    | 1   | 1    | 1   |
| 165 | U0085        | 16 | 3          |               | NLD     | 2004      | Hospitalized patient    | Clin_Isol                     | E. faecium | Blood         | 1        | 1    |      |      |                | 16 | 1    | 2   | 1   | 1    | 1   | 1    | 1   |
| 166 | U0126        | 16 | 3          |               | NLD     | 2004      | Hospitalized patient    | Clin_Isol                     | E. faecium | Tissue        | 0        | 1    |      |      |                | 16 | 1    | 2   | 1   | 1    | 1   | 1    | 1   |
| 167 | U0242        | 16 | 3          |               | NLD     | 2004      | Hospitalized patient    | Hosp_Surv                     | E. faecium | Faeces        | 1        | 1    |      |      |                | 16 | 1    | 2   | 1   | 1    | 1   | 1    | 1   |
| 168 | U0285        | 16 | 3          |               | NLD     | 2004      | Hospitalized patient    | Hosp_Surv                     | E. faecium | Faeces        | 1        | 1    |      |      |                | 16 | 1    | 2   | 1   | 1    | 1   | 1    | 1   |
| 169 | E0155        | 17 | 3          |               | USA     | 1995      | Hospitalized patient    | Hospital outbreak US-2-6      | E. faecium | Faeces        | 1        | 1    | 1    | 1    |                | 17 | 1    | 1   | 1   | 1    | 1   | 1    | 1   |
| 170 | E1284        | 17 | 3          |               | DEU     |           | Hospitalized patient    | Clin_Isol                     | E. faecium | Blood         | 0        | 1    |      |      | 1              | 17 | 1    | 1   | 1   | 1    | 1   | 1    | 1   |
| 171 | E0510        | 17 | 3          |               | AUS     | 1998      | Hospitalized patient    | Hospital outbreak Australia-1 | E. faecium | Blood         | 1        | 1    |      |      | 1              | 17 | 1    | 1   | 1   | 1    | 1   | 1    | 1   |
| 172 | E1308        | 17 | 3          |               | PRT     |           | Hospitalized patient    | Clin_Isol                     | E. faecium | Blood         | 1        | 1    | 1    | 1    |                | 17 | 1    | 1   | 1   | 1    | 1   | 1    | 1   |
| 173 | E0321        | 17 | 3          |               | FRA     | 1997      | Hospitalized patient    | Hosp_Surv                     | E. faecium | Faeces        | 0        | 1    | 1    | 1    |                | 17 | 1    | 1   | 1   | 1    | 1   | 1    | 1   |
| 174 | E0380        | 17 | 3          |               | GBR     | 1997      | Hospitalized patient    | Clin_Isol                     | E. faecium | Blood         | 0        | 0    | 1    | 0    |                | 17 | 1    | 1   | 1   | 1    | 1   | 1    | 1   |
| 175 | E1292        | 17 | 3          |               | ITA     |           | Hospitalized patient    | Clin_Isol                     | E. faecium | Blood         | 1        | 1    |      |      | 1              | 17 | 1    | 1   | 1   | 1    | 1   | 1    | 1   |
| 176 | E1302        | 17 | 3          |               | POL     |           | Hospitalized patient    | Clin_Isol                     | E. faecium | Blood         | 1        | 1    | 1    | 1    |                | 17 | 1    | 1   | 1   | 1    | 1   | 1    | 1   |
| 177 | E1340        | 17 | 3          |               | NOR     | 1999      | Hospitalized patient    | Hospital outbreak NO-1        | E. faecium | Wound         | 0        | 1    | 1    | 0    |                | 17 | 1    | 1   | 1   | 1    | 1   | 1    | 1   |
| 178 | E1463        | 17 | 3          |               | ESP     | 1998      | Hospitalized patient    | Clin_Isol                     | E. faecium | Blood         | 1        | 1    | 1    | 1    |                | 17 | 1    | 1   | 1   | 1    | 1   | 1    | 1   |
| 179 | E1716        | 17 | 3          |               | DNK     |           | Hospitalized patient    | Hospital outbreak DK-1        | E. faecium | nd            | 1        | 1    | 1    | 1    |                | 17 | 1    | 1   | 1   | 1    | 1   | 1    | 1   |
| 180 | A0001        | 17 | 3          |               | AUS     | 1996      | Non-hospitalized person | Comm_Surv                     | E. faecium |               | 1        | 1    |      |      |                | 17 | 1    | 1   | 1   | 1    | 1   | 1    | 1   |
| 181 | A0002        | 17 | 3          |               | AUS     | 1999      | Hospitalized patient    | Clin_Isol                     | E. faecium | Bile          | 0        | 1    |      |      |                | 17 | 1    | 1   | 1   | 1    | 1   | 1    | 1   |
| 182 | A0003        | 17 | 3          |               | AUS     | 1999      | Non-hospitalized person | Comm_Surv                     | E. faecium |               | 1        | 1    |      |      |                | 17 | 1    | 1   | 1   | 1    | 1   | 1    | 1   |
| 183 | A0004        | 17 | 3          |               | AUS     | 1997      | Hospitalized patient    | Clin_Isol                     | E. faecium | Urine         | 1        | 1    |      |      |                | 17 | 1    | 1   | 1   | 1    | 1   | 1    | 1   |
| 184 | A0005        | 17 | 3          |               | USA     | 1994      | Hospitalized patient    | Hosp_Surv                     | E. faecium |               | 0        | 1    |      |      |                | 17 | 1    | 1   | 1   | 1    | 1   | 1    | 1   |
| 185 | A0006        | 17 | 3          |               | AUS     | 1998      | Hospitalized patient    | Clin_Isol                     | E. faecium | Blood         | 1        | 1    |      |      |                | 17 | 1    | 1   | 1   | 1    | 1   | 1    | 1   |
| 186 | A0007        | 17 | 3          |               | GBR     | 1997      | Non-hospitalized person | Comm_Surv                     | E. faecium |               | 1        | 1    |      |      |                | 17 | 1    | 1   | 1   | 1    | 1   | 1    | 1   |
| 187 | A0008        | 17 | 3          |               | AUS     | 1999      | Hospitalized patient    | Clin_Isol                     | E. faecium | Blood         | 1        | 1    |      |      |                | 17 | 1    | 1   | 1   | 1    | 1   | 1    | 1   |
| 188 | A0009        | 17 | 3          |               | AUS     | 1999      | Hospitalized patient    | Clin_Isol                     | E. faecium | Pleural fluid | 1        | 1    |      |      |                | 17 | 1    | 1   | 1   | 1    | 1   | 1    | 1   |
| 189 | A0010        | 17 | 3          |               | AUS     | 1995      | Hospitalized patient    | Clin_Isol                     | E. faecium | Urine         | 1        | 1    |      |      |                | 17 | 1    | 1   | 1   | 1    | 1   | 1    | 1   |



Supplementary Table 1. Meta-data of isolates included in this study

| No  | Strain code | ST | BAPS group | BAPS subgroup | country | year | Source               | Epidemiology                  | Species    | Isol_site        | esp_gene | ampR | SgrA | EcbA | Genomic island | ST | AtpA | Ddl | Gdh | PurK | Gyd | PstS | Adk |
|-----|-------------|----|------------|---------------|---------|------|----------------------|-------------------------------|------------|------------------|----------|------|------|------|----------------|----|------|-----|-----|------|-----|------|-----|
| 253 | E0532       | 17 |            | 3             | AUS     | 1998 | Hospitalized patient | Hospital outbreak Australia-1 | E. faecium | Urine            | 1        | 1    |      |      |                | 17 | 1    | 1   | 1   | 1    | 1   | 1    | 1   |
| 254 | E0547       | 17 |            | 3             | AUS     | 1999 | Hospitalized patient | Clin_Isol                     | E. faecium | Blood            | 1        | 1    |      |      |                | 17 | 1    | 1   | 1   | 1    | 1   | 1    | 1   |
| 255 | E0704       | 17 |            | 3             | GBR     |      | Hospitalized patient | Clin_Isol                     | E. faecium | Blood            | 0        | 1    |      |      |                | 17 | 1    | 1   | 1   | 1    | 1   | 1    | 1   |
| 256 | E0762       | 17 |            | 3             | NLD     | 2000 | Hospitalized patient | Hosp_Surv                     | E. faecium | Faeces           | 0        | 1    |      |      |                | 17 | 1    | 1   | 1   | 1    | 1   | 1    | 1   |
| 257 | E1130       | 17 |            | 3             | USA     | 2000 | Hospitalized patient | Clin_Isol                     | E. faecium | Blood            | 0        | 1    |      |      |                | 17 | 1    | 1   | 1   | 1    | 1   | 1    | 1   |
| 258 | E1162       | 17 |            | 3             | FRA     |      | Hospitalized patient | Clin_Isol                     | E. faecium | Blood            | 1        | 1    |      | 1    | 1              | 17 | 1    | 1   | 1   | 1    | 1   | 1    | 1   |
| 259 | E1165       | 17 |            | 3             | ITA     |      | Hospitalized patient | Clin_Isol                     | E. faecium | Wound            | 1        | 1    |      |      |                | 17 | 1    | 1   | 1   | 1    | 1   | 1    | 1   |
| 260 | E1166       | 17 |            | 3             | ITA     |      | Hospitalized patient | Clin_Isol                     | E. faecium | Urine            | 0        | 1    |      |      |                | 17 | 1    | 1   | 1   | 1    | 1   | 1    | 1   |
| 261 | E1168       | 17 |            | 3             | ITA     |      | Hospitalized patient | Clin_Isol                     | E. faecium | Pneumoniae       | 1        | 1    |      |      |                | 17 | 1    | 1   | 1   | 1    | 1   | 1    | 1   |
| 262 | E1193       | 17 |            | 3             | ESP     |      | Hospitalized patient | Clin_Isol                     | E. faecium | Blood            | 1        | 1    |      |      |                | 17 | 1    | 1   | 1   | 1    | 1   | 1    | 1   |
| 263 | E1280       | 17 |            | 3             | DEU     |      | Hospitalized patient | Clin_Isol                     | E. faecium | Blood            | 0        | 1    |      |      |                | 17 | 1    | 1   | 1   | 1    | 1   | 1    | 1   |
| 264 | E1303       | 17 |            | 3             | POL     |      | Hospitalized patient | Clin_Isol                     | E. faecium | Blood            | 1        | 1    |      |      |                | 17 | 1    | 1   | 1   | 1    | 1   | 1    | 1   |
| 265 | E1317       | 17 |            | 3             | NLD     | 2000 | Hospitalized patient | Clin_Isol                     | E. faecium | Blood            | 0        | 1    |      |      |                | 17 | 1    | 1   | 1   | 1    | 1   | 1    | 1   |
| 266 | E1393       | 17 |            | 3             | GBR     | 2000 | Hospitalized patient | Clin_Isol                     | E. faecium | Blood            | 1        | 1    |      |      |                | 17 | 1    | 1   | 1   | 1    | 1   | 1    | 1   |
| 267 | E1417       | 17 |            | 3             | GBR     | 2000 | Hospitalized patient | Hosp_surv                     | E. faecium | Faeces           | 1        | 1    |      |      |                | 17 | 1    | 1   | 1   | 1    | 1   | 1    | 1   |
| 268 | E1451       | 17 |            | 3             | GRC     | 2001 | Hospitalized patient | Hospital outbreak GR-2        | E. faecium | Peritoneal fluid | 0        | 1    |      |      |                | 17 | 1    | 1   | 1   | 1    | 1   | 1    | 1   |
| 269 | E1454       | 17 |            | 3             | GRC     | 2001 | Hospitalized patient | Hospital outbreak GR-2        | E. faecium | Catheter         | 1        | 1    |      |      |                | 17 | 1    | 1   | 1   | 1    | 1   | 1    | 1   |
| 270 | E1455       | 17 |            | 3             | GRC     | 2001 | Hospitalized patient | Hospital outbreak GR-2        | E. faecium | Pus              | 0        | 1    |      |      |                | 17 | 1    | 1   | 1   | 1    | 1   | 1    | 1   |
| 271 | E1464       | 17 |            | 3             | ESP     | 1998 | Hospitalized patient | Clin_Isol                     | E. faecium | Blood            | 1        | 1    |      |      |                | 17 | 1    | 1   | 1   | 1    | 1   | 1    | 1   |
| 272 | E1476       | 17 |            | 3             | ESP     | 1998 | Hospitalized patient | Clin_Isol                     | E. faecium | Blood            | 0        | 1    |      |      |                | 17 | 1    | 1   | 1   | 1    | 1   | 1    | 1   |
| 273 | E1496       | 17 |            | 3             | ESP     | 1999 | Hospitalized patient | Clin_Isol                     | E. faecium | Urine            | 0        | 1    |      |      |                | 17 | 1    | 1   | 1   | 1    | 1   | 1    | 1   |
| 274 | E1504       | 17 |            | 3             | ESP     | 1995 | Hospitalized patient | Clin_Isol                     | E. faecium | Blood            | 1        | 1    |      |      |                | 17 | 1    | 1   | 1   | 1    | 1   | 1    | 1   |
| 275 | E1699       | 17 |            | 3             | BRA     | 1998 | Hospitalized patient | Hosp_Surv                     | E. faecium | Faeces           | 0        | 1    |      |      |                | 17 | 1    | 1   | 1   | 1    | 1   | 1    | 1   |
| 276 | E1718       | 17 |            | 3             | DNK     |      | Hospitalized patient | Hospital outbreak DK-1        | E. faecium | nd               | 1        | 1    |      |      |                | 17 | 1    | 1   | 1   | 1    | 1   | 1    | 1   |
| 277 | E1765       | 17 |            | 3             | BEL     |      | Hospitalized patient | Clin_Isol                     | E. faecium | Peritoneal fluid | 0        | 1    |      |      |                | 17 | 1    | 1   | 1   | 1    | 1   | 1    | 1   |
| 278 | E1771       | 17 |            | 3             | BEL     |      | Hospitalized patient | Clin_Isol                     | E. faecium | Blood            | 0        | 1    |      |      |                | 17 | 1    | 1   | 1   | 1    | 1   | 1    | 1   |
| 279 | E1975       | 17 |            | 3             | DEU     | 2000 | Hospitalized patient |                               | E. faecium | WA               | 1        | 1    |      |      |                | 17 | 1    | 1   | 1   | 1    | 1   | 1    | 1   |
| 280 | E1977       | 17 |            | 3             | DEU     | 2000 | Hospitalized patient |                               | E. faecium | WA               | 1        | 1    |      |      |                | 17 | 1    | 1   | 1   | 1    | 1   | 1    | 1   |
| 281 | E1978       | 17 |            | 3             | DEU     | 2000 | Hospitalized patient |                               | E. faecium | WA               | 1        | 1    |      |      |                | 17 | 1    | 1   | 1   | 1    | 1   | 1    | 1   |
| 282 | E1979       | 17 |            | 3             | DEU     | 2000 | Hospitalized patient |                               | E. faecium | WA               | 1        | 1    |      |      |                | 17 | 1    | 1   | 1   | 1    | 1   | 1    | 1   |
| 283 | E1980       | 17 |            | 3             | DEU     | 2000 | Hospitalized patient |                               | E. faecium | WA               | 1        | 1    |      |      |                | 17 | 1    | 1   | 1   | 1    | 1   | 1    | 1   |
| 284 | E1981       | 17 |            | 3             | DEU     | 2000 | Hospitalized patient |                               | E. faecium | WA               | 1        | 1    |      |      |                | 17 | 1    | 1   | 1   | 1    | 1   | 1    | 1   |
| 285 | E1982       | 17 |            | 3             | DEU     | 2000 | Hospitalized patient |                               | E. faecium | WA               | 1        | 1    |      |      |                | 17 | 1    | 1   | 1   | 1    | 1   | 1    | 1   |
| 286 | E1983       | 17 |            | 3             | DEU     | 2000 | Hospitalized patient |                               | E. faecium | WA               | 1        | 1    |      |      |                | 17 | 1    | 1   | 1   | 1    | 1   | 1    | 1   |
| 287 | E1985       | 17 |            | 3             | DEU     | 2000 | Hospitalized patient |                               | E. faecium | WA               | 1        | 1    |      |      |                | 17 | 1    | 1   | 1   | 1    | 1   | 1    | 1   |
| 288 | E2000       | 17 |            | 3             | DEU     | 2000 | Hospitalized patient |                               | E. faecium | K-Spitz          | 1        | 1    |      |      |                | 17 | 1    | 1   | 1   | 1    | 1   | 1    | 1   |
| 289 | E2013       | 17 |            | 3             | DEU     | 2000 | Hospitalized patient |                               | E. faecium | K-Urin           | 1        | 1    |      |      |                | 17 | 1    | 1   | 1   | 1    | 1   | 1    | 1   |
| 290 | E2017       | 17 |            | 3             | DEU     | 2000 | Hospitalized patient |                               | E. faecium | K-Urin           | 1        | 1    |      |      |                | 17 | 1    | 1   | 1   | 1    | 1   | 1    | 1   |
| 291 | E2020       | 17 |            | 3             | DEU     | 2000 | Hospitalized patient |                               | E. faecium | K-Urin           | 1        | 1    |      |      |                | 17 | 1    | 1   | 1   | 1    | 1   | 1    | 1   |
| 292 | E2031       | 17 |            | 3             | DEU     | 2000 | Hospitalized patient |                               | E. faecium | Abstrich         | 1        | 1    |      |      |                | 17 | 1    | 1   | 1   | 1    | 1   | 1    | 1   |
| 293 | E2033       | 17 |            | 3             | DEU     | 2000 | Hospitalized patient |                               | E. faecium | WA               | 1        | 1    |      |      |                | 17 | 1    | 1   | 1   | 1    | 1   | 1    | 1   |
| 294 | E2034       | 17 |            | 3             | DEU     | 2000 | Hospitalized patient |                               | E. faecium | WA               | 1        | 1    |      |      |                | 17 | 1    | 1   | 1   | 1    | 1   | 1    | 1   |
| 295 | E2036       | 17 |            | 3             | DEU     | 2000 | Hospitalized patient |                               | E. faecium | WA               | 1        | 1    |      |      |                | 17 | 1    | 1   | 1   | 1    | 1   | 1    | 1   |
| 296 | E2042       | 17 |            | 3             | DEU     | 2001 | Hospitalized patient |                               | E. faecium | WA               | 1        | 1    |      |      |                | 17 | 1    | 1   | 1   | 1    | 1   | 1    | 1   |
| 297 | E2235       | 17 |            | 3             | USA     | 2001 | Environment          | Environment_Hospital          | E. faecium | FIC Grad         | 1        | 1    |      |      |                | 17 | 1    | 1   | 1   | 1    | 1   | 1    | 1   |
| 298 | E2337       | 17 |            | 3             | USA     | 2001 | Environment          | Environment_Hospital          | E. faecium | Inf Pump         | 1        | 1    |      |      |                | 17 | 1    | 1   | 1   | 1    | 1   | 1    | 1   |
| 299 | E2371       | 17 |            | 3             | HUN     | 2005 | Hospitalized patient | Clin_Isol                     | E. faecium | Urine            | 1        | 1    |      |      |                | 17 | 1    | 1   | 1   | 1    | 1   | 1    | 1   |
| 300 | E2374       | 17 |            | 3             | SRB     | 2005 | Hospitalized patient | Clin_Isol                     | E. faecium | Wound            | 1        | 1    |      |      |                | 17 | 1    | 1   | 1   | 1    | 1   | 1    | 1   |
| 301 | E4137       | 17 |            | 3             | GBR     | 1990 | Hospitalized patient | Clin_Isol                     | E. faecium | Blood            | 1        | 1    |      |      |                | 17 | 1    | 1   | 1   | 1    | 1   | 1    | 1   |
| 302 | E4138       | 17 |            | 3             | GBR     | 1990 | Hospitalized patient | Clin_Isol                     | E. faecium | Blood            | 0        | 1    |      |      |                | 17 | 1    | 1   | 1   | 1    | 1   | 1    | 1   |
| 303 | E4139       | 17 |            | 3             | GBR     | 1990 | Hospitalized patient | Clin_Isol                     | E. faecium | Blood            | 0        | 1    |      |      |                | 17 | 1    | 1   | 1   | 1    | 1   | 1    | 1   |
| 304 | E4141       | 17 |            | 3             | GBR     | 1991 | Hospitalized patient | Clin_Isol                     | E. faecium | Blood            | 1        | 1    |      |      |                | 17 | 1    | 1   | 1   | 1    | 1   | 1    | 1   |
| 305 | E4143       | 17 |            | 3             | GBR     | 1993 | Hospitalized patient | Clin_Isol                     | E. faecium | Blood            | 0        | 1    |      |      |                | 17 | 1    | 1   | 1   | 1    | 1   | 1    | 1   |
| 306 | E4145       | 17 |            | 3             | GBR     | 1994 | Hospitalized patient | Clin_Isol                     | E. faecium | Blood            | 1        | 1    |      |      |                | 17 | 1    | 1   | 1   | 1    | 1   | 1    | 1   |
| 307 | E4146       | 17 |            | 3             | GBR     | 1994 | Hospitalized patient | Clin_Isol                     | E. faecium | Blood            | 1        | 1    |      |      |                | 17 | 1    | 1   | 1   | 1    | 1   | 1    | 1   |
| 308 | E4147       | 17 |            | 3             | GBR     | 1994 | Hospitalized patient | Clin_Isol                     | E. faecium | Blood            | 1        | 1    |      |      |                | 17 | 1    | 1   | 1   | 1    | 1   | 1    | 1   |
| 309 | E4149       | 17 |            | 3             | GBR     | 1995 | Hospitalized patient | Clin_Isol                     | E. faecium | Blood            | 0        | 1    |      |      |                | 17 | 1    | 1   | 1   | 1    | 1   | 1    | 1   |
| 310 | E4151       | 17 |            | 3             | GBR     | 1995 | Hospitalized patient | Clin_Isol                     | E. faecium | Blood            | 1        | 1    |      |      |                | 17 | 1    | 1   | 1   | 1    | 1   | 1    | 1   |
| 311 | E4159       | 17 |            | 3             | GBR     | 1999 | Hospitalized patient | Clin_Isol                     | E. faecium | Blood            | 0        | 1    |      |      |                | 17 | 1    | 1   | 1   | 1    | 1   | 1    | 1   |
| 312 | E4163       | 17 |            | 3             | GBR     | 2000 | Hospitalized patient | Clin_Isol                     | E. faecium | Blood            | 1        | 1    |      |      |                | 17 | 1    | 1   | 1   | 1    | 1   | 1    | 1   |
| 313 | E4166       | 17 |            | 3             | GBR     | 2001 | Hospitalized patient | Clin_Isol                     | E. faecium | Blood            | 1        | 1    |      |      |                | 17 | 1    | 1   | 1   | 1    | 1   | 1    | 1   |
| 314 | E4167       | 17 |            | 3             | GBR     | 2001 | Hospitalized patient | Clin_Isol                     | E. faecium | Blood            | 1        | 1    |      |      |                | 17 | 1    | 1   | 1   | 1    | 1   | 1    | 1   |
| 315 | E4169       | 17 |            | 3             | GBR     | 2002 | Hospitalized patient | Clin_Isol                     | E. faecium | Blood            | 1        | 1    |      |      |                | 17 | 1    | 1   | 1   | 1    | 1   | 1    | 1   |

Supplementary Table 1. Meta-data of isolates included in this study

| No  | Strain code    | ST | BAPS group | BAPS subgroup | country | year      | Source                  | Epidemiology             | Species    | Isol_site          | esp_gene | ampR | SgrA | EcbA | Genomic island | ST | AtpA | Ddl | Gdh | PurK | Gyd | PstS | Adk |
|-----|----------------|----|------------|---------------|---------|-----------|-------------------------|--------------------------|------------|--------------------|----------|------|------|------|----------------|----|------|-----|-----|------|-----|------|-----|
| 316 | E4181          | 17 |            | 3             | 3 FRA   | 2003      | Non-hospitalized person | Comm_Surv                | E. faecium | Faeces             | 1        |      |      |      |                | 17 | 1    | 1   | 1   | 1    | 1   | 1    | 1   |
| 317 | FA185/TX2026   | 17 |            | 3             | 3 USA   | 1988      | Hospitalized patient    |                          |            |                    | 1        |      |      |      |                | 17 | 1    | 1   | 1   | 1    | 1   | 1    | 1   |
| 318 | FA191/TX2027   | 17 |            | 3             | 3 USA   | 1988      | Hospitalized patient    |                          |            |                    | 1        |      |      |      |                | 17 | 1    | 1   | 1   | 1    | 1   | 1    | 1   |
| 319 | FA232/TX2022   | 17 |            | 3             | 3 USA   | 1988      | Hospitalized patient    |                          |            |                    | 1        |      |      |      |                | 17 | 1    | 1   | 1   | 1    | 1   | 1    | 1   |
| 320 | MCV/264/TX2036 | 17 |            | 3             | 3 USA   | 1982      | Hospitalized patient    |                          |            |                    | 1        |      |      |      |                | 17 | 1    | 1   | 1   | 1    | 1   | 1    | 1   |
| 321 | MCV130/TX2029  | 17 |            | 3             | 3 USA   | 1982      | Hospitalized patient    |                          |            |                    | 1        |      |      |      |                | 17 | 1    | 1   | 1   | 1    | 1   | 1    | 1   |
| 322 | MCV161/TX2031  | 17 |            | 3             | 3 USA   | 1982      | Hospitalized patient    |                          |            |                    | 1        |      |      |      |                | 17 | 1    | 1   | 1   | 1    | 1   | 1    | 1   |
| 323 | MCV211/TX2033  | 17 |            | 3             | 3 USA   | 1982      | Hospitalized patient    |                          |            |                    | 1        |      |      |      |                | 17 | 1    | 1   | 1   | 1    | 1   | 1    | 1   |
| 324 | MCV255/TX2035  | 17 |            | 3             | 3 USA   | 1982      | Hospitalized patient    |                          |            |                    | 1        |      |      |      |                | 17 | 1    | 1   | 1   | 1    | 1   | 1    | 1   |
| 325 | MCV266/TX2034  | 17 |            | 3             | 3 USA   | 1982      | Hospitalized patient    |                          |            |                    | 1        |      |      |      |                | 17 | 1    | 1   | 1   | 1    | 1   | 1    | 1   |
| 326 | MCV268/TX2038  | 17 |            | 3             | 3 USA   | 1982      | Hospitalized patient    |                          |            |                    | 1        |      |      |      |                | 17 | 1    | 1   | 1   | 1    | 1   | 1    | 1   |
| 327 | SEH41/TX1405   | 17 |            | 3             | 3 USA   | 1993–1994 | Hospitalized patient    |                          |            |                    | 1        |      |      |      |                | 17 | 1    | 1   | 1   | 1    | 1   | 1    | 1   |
| 328 | SEH7/TX1371    | 17 |            | 3             | 3 USA   | 1993–1994 | Hospitalized patient    |                          |            |                    | 1        |      |      |      |                | 17 | 1    | 1   | 1   | 1    | 1   | 1    | 1   |
| 329 | U0025          | 17 |            | 3             | 3 NLD   | 2001      | Hospitalized patient    | Clin_Isol                | E. faecium | Drain fluid        | 1        |      |      |      |                | 17 | 1    | 1   | 1   | 1    | 1   | 1    | 1   |
| 330 | U0031          | 17 |            | 3             | 3 NLD   | 2001      | Hospitalized patient    | Clin_Isol                | E. faecium | Peritoneal fluid   | 1        |      |      |      |                | 17 | 1    | 1   | 1   | 1    | 1   | 1    | 1   |
| 331 | U0070          | 17 |            | 3             | 3 NLD   | 2003      | Hospitalized patient    | Clin_Isol                | E. faecium | Peritoneal fluid   | 0        |      |      |      |                | 17 | 1    | 1   | 1   | 1    | 1   | 1    | 1   |
| 332 | U0095          | 17 |            | 3             | 3 NLD   | 2004      | Hospitalized patient    | Hosp_Surv                | E. faecium | Faeces             | 0        |      |      |      |                | 17 | 1    | 1   | 1   | 1    | 1   | 1    | 1   |
| 333 | U0106          | 17 |            | 3             | 3 NLD   | 2004      | Hospitalized patient    | Clin_Isol                | E. faecium | Blood              | 1        |      |      |      |                | 17 | 1    | 1   | 1   | 1    | 1   | 1    | 1   |
| 334 | U0111          | 17 |            | 3             | 3 NLD   | 2004      | Hospitalized patient    | Hosp_Surv                | E. faecium | Faeces             | 0        |      |      |      |                | 17 | 1    | 1   | 1   | 1    | 1   | 1    | 1   |
| 335 | U0211          | 17 |            | 3             | 3 NLD   | 1997      | Hospitalized patient    | Clin_Isol                | E. faecium | Blood              | 1        |      |      |      |                | 17 | 1    | 1   | 1   | 1    | 1   | 1    | 1   |
| 336 | U0213          | 17 |            | 3             | 3 NLD   | 1997      | Hospitalized patient    | Clin_Isol                | E. faecium | Blood              | 0        |      |      |      |                | 17 | 1    | 1   | 1   | 1    | 1   | 1    | 1   |
| 337 | U0215          | 17 |            | 3             | 3 NLD   | 1997      | Hospitalized patient    | Clin_Isol                | E. faecium | Peritoneal fluid   | 0        |      |      |      |                | 17 | 1    | 1   | 1   | 1    | 1   | 1    | 1   |
| 338 | U0218          | 17 |            | 3             | 3 NLD   | 1997      | Hospitalized patient    | Clin_Isol                | E. faecium | Blood              | 0        |      |      |      |                | 17 | 1    | 1   | 1   | 1    | 1   | 1    | 1   |
| 339 | U0222          | 17 |            | 3             | 3 NLD   | 1996      | Hospitalized patient    | Clin_Isol                | E. faecium | Urine              | 1        |      |      |      |                | 17 | 1    | 1   | 1   | 1    | 1   | 1    | 1   |
| 340 | U0225          | 17 |            | 3             | 3 NLD   | 1996      | Hospitalized patient    | Clin_Isol                | E. faecium | Pus                | 0        |      |      |      |                | 17 | 1    | 1   | 1   | 1    | 1   | 1    | 1   |
| 341 | U0229          | 17 |            | 3             | 3 NLD   | 1995      | Hospitalized patient    | Clin_Isol                | E. faecium | Blood              | 1        |      |      |      |                | 17 | 1    | 1   | 1   | 1    | 1   | 1    | 1   |
| 342 | U0233          | 17 |            | 3             | 3 NLD   | 1994      | Hospitalized patient    | Clin_Isol                | E. faecium | Liquor             | 1        |      |      |      |                | 17 | 1    | 1   | 1   | 1    | 1   | 1    | 1   |
| 343 | VREH-5/TX2420  | 17 |            | 3             | 3 USA   | 1992      | Hospitalized patient    |                          |            |                    | 1        |      |      |      |                | 17 | 1    | 1   | 1   | 1    | 1   | 1    | 1   |
| 344 | E0013          | 18 |            | 3             | 3 GBR   | 1992      | Hospitalized patient    | Hospital outbreak UK-1   | E. faecium | Urine              | 1        |      | 1    | 0    | 1              | 18 | 7    | 1   | 1   | 1    | 5   | 1    | 1   |
| 345 | E1500          | 18 |            | 3             | 3 ESP   | 1997      | Hospitalized patient    | Clin_Isol                | E. faecium | Blood              | 0        |      | 1    | 1    | 1              | 18 | 7    | 1   | 1   | 1    | 5   | 1    | 1   |
| 346 | E1717          | 18 |            | 3             | 3 DNK   |           | Hospitalized patient    | Hospital outbreak DK-2   | E. faecium | nd                 | 0        |      | 1    | 0    | 1              | 18 | 7    | 1   | 1   | 1    | 5   | 1    | 1   |
| 347 | E1731          | 18 |            | 3             | 3 TZA   |           | Hospitalized patient    | Clin_Isol                | E. faecium | Blood              | 0        |      | 1    | 0    | 1              | 18 | 7    | 1   | 1   | 1    | 5   | 1    | 1   |
| 348 | E1850          | 18 |            | 3             | 3 ESP   | 2001      | Hospitalized patient    | Hosp_Surv                | E. faecium | Faeces             | 0        |      | 1    | 1    | 0              | 18 | 7    | 1   | 1   | 1    | 5   | 1    | 1   |
| 349 | E1467          | 18 |            | 3             | 3 ESP   | 1997      | Hospitalized patient    | Clin_Isol                | E. faecium | Blood              | 1        |      | 1    | 1    | 1              | 18 | 7    | 1   | 1   | 1    | 5   | 1    | 1   |
| 350 | E1652          | 18 |            | 3             | 3 NLD   | 2002      | Hospitalized patient    | Hospital outbreak NL-1-2 | E. faecium | Faeces             | 0        |      | 1    | 0    | 1              | 18 | 7    | 1   | 1   | 1    | 5   | 1    | 1   |
| 351 | E1734          | 18 |            | 3             | 3 ESP   | 1995      | Hospitalized patient    | Clin_Isol                | E. faecium | Blood              | 0        |      | 1    | 0    | 1              | 18 | 7    | 1   | 1   | 1    | 5   | 1    | 1   |
| 352 | E1737          | 18 |            | 3             | 3 ESP   | 1997      | Hospitalized patient    | Clin_Isol                | E. faecium | Blood              | 0        |      | 1    | 0    | 1              | 18 | 7    | 1   | 1   | 1    | 5   | 1    | 1   |
| 353 | E1794          | 18 |            | 3             | 3 USA   | 1991      | Hospitalized patient    | Clin_Isol                | E. faecium | Blood              | 0        |      | 1    | 1    | 1              | 18 | 7    | 1   | 1   | 1    | 5   | 1    | 1   |
| 354 | 875-D/TX2048   | 18 |            | 3             | 3 USA   | 1988      | Hospitalized patient    |                          |            |                    |          | 1    |      |      |                | 18 | 7    | 1   | 1   | 1    | 5   | 1    | 1   |
| 355 | A0266          | 18 |            | 3             | 3 NLD   | 2002      | Hospitalized patient    | Clin_Isol                | E. faecium | AP                 | 0        |      | 1    |      |                | 18 | 7    | 1   | 1   | 1    | 5   | 1    | 1   |
| 356 | A0290          | 18 |            | 3             | 3 NLD   | 2005      | Hospitalized patient    | Clin_Isol                | E. faecium | Urine              | 1        |      | 1    |      |                | 18 | 7    | 1   | 1   | 1    | 5   | 1    | 1   |
| 357 | A0863          | 18 |            | 3             | 3 DEU   | 2004      | Hospitalized patient    | Clin_Isol                | E. faecium | urine              | 0        |      | 1    |      |                | 18 | 7    | 1   | 1   | 1    | 5   | 1    | 1   |
| 358 | A0864          | 18 |            | 3             | 3 DEU   | 2004      | Hospitalized patient    | Hosp_Surv                | E. faecium | groin swab         | 0        |      | 1    |      |                | 18 | 7    | 1   | 1   | 1    | 5   | 1    | 1   |
| 359 | A1015          | 18 |            | 3             | 3 DEU   | 2004      | Hospitalized patient    |                          |            |                    |          |      |      |      |                | 18 | 7    | 1   | 1   | 1    | 5   | 1    | 1   |
| 360 | A1018          | 18 |            | 3             | 3 DEU   | 2004      | Hospitalized patient    | Hosp_Surv                | E. faecium | groin swab         | 0        |      | 1    |      |                | 18 | 7    | 1   | 1   | 1    | 5   | 1    | 1   |
| 361 | A1019          | 18 |            | 3             | 3 DEU   | 2004      | Hospitalized patient    | Clin_Isol                | E. faecium | urine              | 0        |      | 1    |      |                | 18 | 7    | 1   | 1   | 1    | 5   | 1    | 1   |
| 362 | A1024          | 18 |            | 3             | 3 DEU   | 2005      | Hospitalized patient    |                          |            |                    |          |      |      |      |                | 18 | 7    | 1   | 1   | 1    | 5   | 1    | 1   |
| 363 | A1108          | 18 |            | 3             | 3 ITA   | 2005      | Hospitalized patient    | Hosp_surv                | E. faecium | Skin swab          | 0        |      | 1    |      |                | 18 | 7    | 1   | 1   | 1    | 5   | 1    | 1   |
| 364 | A1109          | 18 |            | 3             | 3 ITA   | 2005      | Hospitalized patient    | Clin_isol                | E. faecium | Broncoaspirate     | 0        |      | 1    |      |                | 18 | 7    | 1   | 1   | 1    | 5   | 1    | 1   |
| 365 | A1115          | 18 |            | 3             | 3 ITA   | 2005      | Hospitalized patient    | Clin_isol                | E. faecium | Faringeal swab     | 0        |      | 1    |      |                | 18 | 7    | 1   | 1   | 1    | 5   | 1    | 1   |
| 366 | A1117          | 18 |            | 3             | 3 ITA   | 2005      | Hospitalized patient    | Clin_isol                | E. faecium | Urine              | 0        |      | 1    |      |                | 18 | 7    | 1   | 1   | 1    | 5   | 1    | 1   |
| 367 | A1119          | 18 |            | 3             | 3 ITA   | 2005      | Hospitalized patient    | Clin_isol                | E. faecium | Blood              | 0        |      | 1    |      |                | 18 | 7    | 1   | 1   | 1    | 5   | 1    | 1   |
| 368 | A1120          | 18 |            | 3             | 3 ITA   | 2005      | Hospitalized patient    | Clin_isol                | E. faecium | Blood              | 0        |      | 1    |      |                | 18 | 7    | 1   | 1   | 1    | 5   | 1    | 1   |
| 369 | A1127          | 18 |            | 3             | 3 ITA   | 2005      | Hospitalized patient    | Hosp_surv                | E. faecium |                    | 0        |      |      |      |                | 18 | 7    | 1   | 1   | 1    | 5   | 1    | 1   |
| 370 | A1131          | 18 |            | 3             | 3 ITA   | 2005      | Hospitalized patient    | Hosp_surv                | E. faecium | Skin swab          | 0        |      | 1    |      |                | 18 | 7    | 1   | 1   | 1    | 5   | 1    | 1   |
| 371 | A1133          | 18 |            | 3             | 3 ITA   | 2005      | Hospitalized patient    | Clin_isol                | E. faecium | Blood              | 0        |      | 1    |      |                | 18 | 7    | 1   | 1   | 1    | 5   | 1    | 1   |
| 372 | A1138          | 18 |            | 3             | 3 ITA   | 2005      | Hospitalized patient    | Clin_isol                | E. faecium | Urine              | 1        |      | 1    |      |                | 18 | 7    | 1   | 1   | 1    | 5   | 1    | 1   |
| 373 | A1159          | 18 |            | 3             | 3 ITA   | 2005      | Hospitalized patient    | Clin_isol                | E. faecium | Abdominal drainage | 0        |      | 1    |      |                | 18 | 7    | 1   | 1   | 1    | 5   | 1    | 1   |
| 374 | A1184          | 18 |            | 3             | 3 PRT   | 2005      | Hospitalized patient    | Clin_Isol                | E. faecium | Ascites            | 1        |      |      |      |                | 18 | 7    | 1   | 1   | 1    | 5   | 1    | 1   |
| 375 | A1379          | 18 |            | 3             | 3 CHN   | 2004      | Hospitalized patient    | Clin_Isol                | E. faecium | Urine              | 0        |      | 1    |      |                | 18 | 7    | 1   | 1   | 1    | 5   | 1    | 1   |
| 376 | A1387          | 18 |            | 3             | 3 CHN   | 2007      | Hospitalized patient    | Clin_Isol                | E. faecium | Urine              | 1        |      | 1    |      |                | 18 | 7    | 1   | 1   | 1    | 5   | 1    | 1   |
| 377 | A1391          | 18 |            | 3             | 3 CHN   | 2007      | Hospitalized patient    | Clin_Isol                | E. faecium | Drain              | 1        |      | 1    |      |                | 18 | 7    | 1   | 1   | 1    | 5   | 1    | 1   |
| 378 | A1500          | 18 |            | 3             | 3 DEU   | 1996      | Hospitalized patient    | Clin_Isol                | E. faecium | blood              | 0        |      | 1    |      |                | 18 | 7    | 1   | 1   | 1    | 5   | 1    | 1   |

Supplementary Table 1. Meta-data of isolates included in this study

| No  | Strain code | ST | BAPS group | BAPS subgroup | country | year | Source                  | Epidemiology             | Species    | isol_site        | esp_gene | ampR | SgrA | EcbA | Genomic island | ST | AtpA | Ddl | Gdh | PurK | Gyd | PstS | Adk |
|-----|-------------|----|------------|---------------|---------|------|-------------------------|--------------------------|------------|------------------|----------|------|------|------|----------------|----|------|-----|-----|------|-----|------|-----|
| 379 | A1507       | 18 |            | 3             | DEU     | 1998 | Hospitalized patient    | Clin_Isol                | E. faecium | blood            | 0        | 1    |      |      |                | 18 | 7    | 1   | 1   | 1    | 5   | 1    | 1   |
| 380 | A1525       | 18 |            | 3             | DEU     | 1999 | Hospitalized patient    | Clin_Isol                | E. faecium | blood            | 0        | 1    |      |      |                | 18 | 7    | 1   | 1   | 1    | 5   | 1    | 1   |
| 381 | A1526       | 18 |            | 3             | DEU     | 1999 | Hospitalized patient    | Clin_Isol                | E. faecium | blood            | 1        | 1    |      |      |                | 18 | 7    | 1   | 1   | 1    | 5   | 1    | 1   |
| 382 | A1528       | 18 |            | 3             | DEU     | 2000 | Hospitalized patient    | Clin_Isol                | E. faecium | blood            | 0        | 1    |      |      |                | 18 | 7    | 1   | 1   | 1    | 5   | 1    | 1   |
| 383 | A1535       | 18 |            | 3             | DEU     | 2001 | Hospitalized patient    | Clin_Isol                | E. faecium | blood            | 1        | 1    |      |      |                | 18 | 7    | 1   | 1   | 1    | 5   | 1    | 1   |
| 384 | A1538       | 18 |            | 3             | DEU     | 2001 | Hospitalized patient    | Clin_Isol                | E. faecium | blood            | 0        | 1    |      |      |                | 18 | 7    | 1   | 1   | 1    | 5   | 1    | 1   |
| 385 | A1539       | 18 |            | 3             | DEU     | 2002 | Hospitalized patient    | Clin_Isol                | E. faecium | blood            | 0        | 1    |      |      |                | 18 | 7    | 1   | 1   | 1    | 5   | 1    | 1   |
| 386 | A1552       | 18 |            | 3             | DEU     | 2004 | Hospitalized patient    | Clin_Isol                | E. faecium | blood            | 0        | 1    |      |      |                | 18 | 7    | 1   | 1   | 1    | 5   | 1    | 1   |
| 387 | A1559       | 18 |            | 3             | DEU     | 2005 | Hospitalized patient    | Clin_Isol                | E. faecium | blood            | 0        | 1    |      |      |                | 18 | 7    | 1   | 1   | 1    | 5   | 1    | 1   |
| 388 | A1560       | 18 |            | 3             | DEU     | 2005 | Hospitalized patient    | Clin_Isol                | E. faecium | blood            | 0        | 1    |      |      |                | 18 | 7    | 1   | 1   | 1    | 5   | 1    | 1   |
| 389 | A1561       | 18 |            | 3             | DEU     | 2005 | Hospitalized patient    | Clin_Isol                | E. faecium | blood            | 0        | 1    |      |      |                | 18 | 7    | 1   | 1   | 1    | 5   | 1    | 1   |
| 390 | A1563       | 18 |            | 3             | DEU     | 2006 | Hospitalized patient    | Clin_Isol                | E. faecium | blood            | 0        | 1    |      |      |                | 18 | 7    | 1   | 1   | 1    | 5   | 1    | 1   |
| 391 | A1566       | 18 |            | 3             | DEU     | 2006 | Hospitalized patient    | Clin_Isol                | E. faecium | blood            | 0        | 1    |      |      |                | 18 | 7    | 1   | 1   | 1    | 5   | 1    | 1   |
| 392 | A1604       | 18 |            | 3             | DEU     | 2006 | Hospitalized patient    | Clin_Isol                | E. faecium | blood            | 0        | 1    |      |      |                | 18 | 7    | 1   | 1   | 1    | 5   | 1    | 1   |
| 393 | A1705       | 18 |            | 3             | DEU     | 2004 | Non-hospitalized person | Comm_Surv                | E. faecium | pus              | 0        | 0    |      |      |                | 18 | 7    | 1   | 1   | 1    | 5   | 1    | 1   |
| 394 | A1826       | 18 |            | 3             | SWE     |      | Hospitalized patient    | Clin_Isol                | E. faecium | Blood            |          |      |      |      |                | 18 | 7    | 1   | 1   | 1    | 5   | 1    | 1   |
| 395 | A1835       | 18 |            | 3             | SWE     |      | Hospitalized patient    | Clin_Isol                | E. faecium | Blood            |          |      |      |      |                | 18 | 7    | 1   | 1   | 1    | 5   | 1    | 1   |
| 396 | A2070       | 18 |            | 3             | RUS     | 2005 | Hospitalized patient    | Clin_Isol                | E. faecium | Wound            | 1        | 1    |      |      |                | 18 | 7    | 1   | 1   | 1    | 5   | 1    | 1   |
| 397 | A2071       | 18 |            | 3             | RUS     | 2005 | Hospitalized patient    | Hosp_Surv                | E. faecium | Faeces           | 1        | 1    |      |      |                | 18 | 7    | 1   | 1   | 1    | 5   | 1    | 1   |
| 398 | A2072       | 18 |            | 3             | RUS     | 2006 | Hospitalized patient    | Hosp_Surv                | E. faecium | Faeces           | 1        | 1    |      |      |                | 18 | 7    | 1   | 1   | 1    | 5   | 1    | 1   |
| 399 | E0233       | 18 |            | 3             | GBR     | 1992 | Hospitalized patient    | Hospital outbreak UK-1   | E. faecium | Urine            | 1        | 1    |      |      |                | 18 | 7    | 1   | 1   | 1    | 5   | 1    | 1   |
| 400 | E0235       | 18 |            | 3             | GBR     | 1992 | Hospitalized patient    | Hospital outbreak UK-1   | E. faecium | Urine            | 1        | 1    |      |      |                | 18 | 7    | 1   | 1   | 1    | 5   | 1    | 1   |
| 401 | E0236       | 18 |            | 3             | GBR     | 1992 | Hospitalized patient    | Hospital outbreak UK-1   | E. faecium | Pus              | 1        | 1    |      |      |                | 18 | 7    | 1   | 1   | 1    | 5   | 1    | 1   |
| 402 | E0506       | 18 |            | 3             | AUS     | 1994 | Hospitalized patient    | Clin_Isol                | E. faecium | Peritoneal fluid | 0        | 1    |      |      |                | 18 | 7    | 1   | 1   | 1    | 5   | 1    | 1   |
| 403 | E0766       | 18 |            | 3             | NLD     | 2000 | Hospitalized patient    | Hosp_Surv                | E. faecium | Faeces           | 0        | 1    |      |      |                | 18 | 7    | 1   | 1   | 1    | 5   | 1    | 1   |
| 404 | E0841       | 18 |            | 3             | NLD     | 2000 | Hospitalized patient    | Hosp_Surv                | E. faecium | Faeces           | 0        | 1    |      |      |                | 18 | 7    | 1   | 1   | 1    | 5   | 1    | 1   |
| 405 | E1176       | 18 |            | 3             | ESP     |      | Hospitalized patient    | Clin_Isol                | E. faecium | Nosocomial Pneu  | 1        | 1    |      |      |                | 18 | 7    | 1   | 1   | 1    | 5   | 1    | 1   |
| 406 | E1184       | 18 |            | 3             | FRA     |      | Hospitalized patient    | Clin_Isol                | E. faecium | Blood            | 0        | 1    |      |      |                | 18 | 7    | 1   | 1   | 1    | 5   | 1    | 1   |
| 407 | E1306       | 18 |            | 3             | PRT     |      | Hospitalized patient    | Clin_Isol                | E. faecium | Blood            | 0        | 1    |      |      |                | 18 | 7    | 1   | 1   | 1    | 5   | 1    | 1   |
| 408 | E1336       | 18 |            | 3             | NLD     | 2001 | Hospitalized patient    | Clin_Isol                | E. faecium | Wound            | 0        | 1    |      |      |                | 18 | 7    | 1   | 1   | 1    | 5   | 1    | 1   |
| 409 | E1387       | 18 |            | 3             | GBR     | 2000 | Hospitalized patient    | Clin_Isol                | E. faecium | Faeces           | 0        | 1    |      |      |                | 18 | 7    | 1   | 1   | 1    | 5   | 1    | 1   |
| 410 | E1413       | 18 |            | 3             | GBR     | 2000 | Hospitalized patient    | Clin_Isol                | E. faecium |                  | 0        | 1    |      |      |                | 18 | 7    | 1   | 1   | 1    | 5   | 1    | 1   |
| 411 | E1469       | 18 |            | 3             | ESP     | 2000 | Hospitalized patient    | Clin_Isol                | E. faecium | Blood            | 1        | 1    |      |      |                | 18 | 7    | 1   | 1   | 1    | 5   | 1    | 1   |
| 412 | E1471       | 18 |            | 3             | ESP     | 1999 | Hospitalized patient    | Clin_Isol                | E. faecium | Blood            | 0        | 1    |      |      |                | 18 | 7    | 1   | 1   | 1    | 5   | 1    | 1   |
| 413 | E1473       | 18 |            | 3             | ESP     | 2000 | Hospitalized patient    | Clin_Isol                | E. faecium | Blood            | 0        | 1    |      |      |                | 18 | 7    | 1   | 1   | 1    | 5   | 1    | 1   |
| 414 | E1497       | 18 |            | 3             | ESP     | 1998 | Hospitalized patient    | Clin_Isol                | E. faecium | Urine            | 0        | 1    |      |      |                | 18 | 7    | 1   | 1   | 1    | 5   | 1    | 1   |
| 415 | E1507       | 18 |            | 3             | ESP     | 1996 | Hospitalized patient    | Clin_Isol                | E. faecium | Blood            | 0        | 0    |      |      |                | 18 | 7    | 1   | 1   | 1    | 5   | 1    | 1   |
| 416 | E1592       | 18 |            | 3             | NLD     | 2002 | Hospitalized patient    | Hosp_surv                | E. faecium | Faeces           | 0        | 1    |      |      |                | 18 | 7    | 1   | 1   | 1    | 5   | 1    | 1   |
| 417 | E1653       | 18 |            | 3             | NLD     | 2002 | Hospitalized patient    | Hospital outbreak NL-1-2 | E. faecium | Faeces           | 0        | 1    |      |      |                | 18 | 7    | 1   | 1   | 1    | 5   | 1    | 1   |
| 418 | E1655       | 18 |            | 3             | NLD     | 2002 | Hospitalized patient    | Hospital outbreak NL-1-2 | E. faecium | Faeces           | 0        | 1    |      |      |                | 18 | 7    | 1   | 1   | 1    | 5   | 1    | 1   |
| 419 | E1657       | 18 |            | 3             | NLD     | 2002 | Hospitalized patient    | Hospital outbreak NL-1-2 | E. faecium | Faeces           | 0        | 1    |      |      |                | 18 | 7    | 1   | 1   | 1    | 5   | 1    | 1   |
| 420 | E1658       | 18 |            | 3             | NLD     | 2002 | Hospitalized patient    | Hospital outbreak NL-1-2 | E. faecium | Faeces           | 0        | 1    |      |      |                | 18 | 7    | 1   | 1   | 1    | 5   | 1    | 1   |
| 421 | E1659       | 18 |            | 3             | NLD     | 2002 | Hospitalized patient    | Hospital outbreak NL-1-2 | E. faecium | Faeces           | 0        | 1    |      |      |                | 18 | 7    | 1   | 1   | 1    | 5   | 1    | 1   |
| 422 | E1719       | 18 |            | 3             | DNK     |      | Hospitalized patient    | Hospital outbreak DK-2   | E. faecium | nd               | 0        | 1    |      |      |                | 18 | 7    | 1   | 1   | 1    | 5   | 1    | 1   |
| 423 | E1732       | 18 |            | 3             | TZA     |      | Hospitalized patient    | Clin_Isol                | E. faecium | Blood            | 0        | 1    |      |      |                | 18 | 7    | 1   | 1   | 1    | 5   | 1    | 1   |
| 424 | E1738       | 18 |            | 3             | ESP     | 2002 | Non-hospitalized person | Clin_Isol                | E. faecium | nd               | 0        | 1    |      |      |                | 18 | 7    | 1   | 1   | 1    | 5   | 1    | 1   |
| 425 | E1763       | 18 |            | 3             | BEL     |      | Hospitalized patient    | Clin_Isol                | E. faecium | Urine            | 1        | 1    |      |      |                | 18 | 7    | 1   | 1   | 1    | 5   | 1    | 1   |
| 426 | E1774       | 18 |            | 3             | BEL     | 2001 | Pig                     | Animal_pig               | E. faecium | Faeces           | 0        | 1    |      |      |                | 18 | 7    | 1   | 1   | 1    | 5   | 1    | 1   |
| 427 | E1868       | 18 |            | 3             | ESP     | 2001 | Hospitalized patient    | Hosp_Surv                | E. faecium | Faeces           |          | 1    |      |      |                | 18 | 7    | 1   | 1   | 1    | 5   | 1    | 1   |
| 428 | E1869       | 18 |            | 3             | ESP     | 2001 | Hospitalized patient    | Hosp_Surv                | E. faecium | Faeces           |          | 1    |      |      |                | 18 | 7    | 1   | 1   | 1    | 5   | 1    | 1   |
| 429 | E1989       | 18 |            | 3             | DEU     | 2001 | Hospitalized patient    |                          | E. faecium | WA               |          |      |      |      |                | 18 | 7    | 1   | 1   | 1    | 5   | 1    | 1   |
| 430 | E1994       | 18 |            | 3             | DEU     | 2000 | Hospitalized patient    |                          | E. faecium | Sheldonspitze    |          |      |      |      |                | 18 | 7    | 1   | 1   | 1    | 5   | 1    | 1   |
| 431 | E1995       | 18 |            | 3             | DEU     | 2000 | Hospitalized patient    |                          | E. faecium | WA (unten)       |          |      |      |      |                | 18 | 7    | 1   | 1   | 1    | 5   | 1    | 1   |
| 432 | E1996       | 18 |            | 3             | DEU     | 2000 | Hospitalized patient    |                          | E. faecium | BAL              |          |      |      |      |                | 18 | 7    | 1   | 1   | 1    | 5   | 1    | 1   |
| 433 | E1997       | 18 |            | 3             | DEU     | 2000 | Hospitalized patient    |                          | E. faecium | WA               |          |      |      |      |                | 18 | 7    | 1   | 1   | 1    | 5   | 1    | 1   |
| 434 | E2007       | 18 |            | 3             | DEU     | 2000 | Hospitalized patient    |                          | E. faecium | A                |          |      |      |      |                | 18 | 7    | 1   | 1   | 1    | 5   | 1    | 1   |
| 435 | E2008       | 18 |            | 3             | DEU     | 2000 | Hospitalized patient    |                          | E. faecium | A                |          |      |      |      |                | 18 | 7    | 1   | 1   | 1    | 5   | 1    | 1   |
| 436 | E2012       | 18 |            | 3             | DEU     | 2000 | Hospitalized patient    |                          | E. faecium | K-Spitze         |          |      |      |      |                | 18 | 7    | 1   | 1   | 1    | 5   | 1    | 1   |
| 437 | E2022       | 18 |            | 3             | DEU     | 2001 | Hospitalized patient    |                          | E. faecium | K-Urin           |          |      |      |      |                | 18 | 7    | 1   | 1   | 1    | 5   | 1    | 1   |
| 438 | E2373       | 18 |            | 3             | SRB     | 2005 | Hospitalized patient    | Hospital outbreak SRB-1  | E. faecium | Coproculture     |          |      |      |      |                | 18 | 7    | 1   | 1   | 1    | 5   | 1    | 1   |
| 439 | E3998       | 18 |            | 3             | NLD     | 2003 | Hospitalized patient    | Clin_Isol                | E. faecium | Blood            | 0        | 1    |      |      |                | 18 | 7    | 1   | 1   | 1    | 5   | 1    | 1   |
| 440 | E4148       | 18 |            | 3             | GBR     | 1994 | Hospitalized patient    | Clin_Isol                | E. faecium | Blood            | 1        | 1    |      |      |                | 18 | 7    | 1   | 1   | 1    | 5   | 1    | 1   |
| 441 | E4152       | 18 |            | 3             | GBR     | 1996 | Hospitalized patient    | Clin_Isol                | E. faecium | Blood            | 1        | 1    |      |      |                | 18 | 7    | 1   | 1   | 1    | 5   | 1    | 1   |

Supplementary Table 1. Meta-data of isolates included in this study

| No  | Strain code    | ST | BAPS group | BAPS subgroup | country | year      | Source                  | Epidemiology           | Species    | Isol_site       | esp_gene | ampR | SgrA | EcbA | Genomic island | ST | AtpA | Ddl | Gdh | PurK | Gyd | PstS | Adk |
|-----|----------------|----|------------|---------------|---------|-----------|-------------------------|------------------------|------------|-----------------|----------|------|------|------|----------------|----|------|-----|-----|------|-----|------|-----|
| 442 | E4160          | 18 | 3          | 3             | GBR     | 1999      | Hospitalized patient    | Clin_Isol              | E. faecium | Blood           | 0        | 1    |      |      |                | 18 | 7    | 1   | 1   | 1    | 5   | 1    | 1   |
| 443 | E4165          | 18 | 3          | 3             | GBR     | 2000      | Hospitalized patient    | Clin_Isol              | E. faecium | Blood           | 1        | 1    |      |      |                | 18 | 7    | 1   | 1   | 1    | 5   | 1    | 1   |
| 444 | E4184          | 18 | 3          | 3             | NLD     | 2007      | Hospitalized patient    | Clin_Isol              | E. faecium | Endocarditis    | 0        |      |      |      |                | 18 | 7    | 1   | 1   | 1    | 5   | 1    | 1   |
| 445 | E4569          | 18 | 3          | 3             | NLD     | 2008      | Cat                     | Animal_Cat             | E. faecium | Faeces          |          | 1    |      |      |                | 18 | 7    | 1   | 1   | 1    | 5   | 1    | 1   |
| 446 | M-1634/TX2000  | 18 | 3          | 3             | USA     | 1986      | Hospitalized patient    |                        |            |                 | 1        |      |      |      |                | 18 | 7    | 1   | 1   | 1    | 5   | 1    | 1   |
| 447 | SH-10/TX2435   | 18 | 3          | 3             | USA     | 1990-1991 | Hospitalized patient    |                        |            |                 | 1        |      |      |      |                | 18 | 7    | 1   | 1   | 1    | 5   | 1    | 1   |
| 448 | SH-4/TX2429    | 18 | 3          | 3             | USA     | 1990-1991 | Hospitalized patient    |                        |            |                 | 1        |      |      |      |                | 18 | 7    | 1   | 1   | 1    | 5   | 1    | 1   |
| 449 | SH-5/TX2430    | 18 | 3          | 3             | USA     | 1990-1991 | Hospitalized patient    |                        |            |                 | 1        |      |      |      |                | 18 | 7    | 1   | 1   | 1    | 5   | 1    | 1   |
| 450 | U0004          | 18 | 3          | 3             | NLD     | 2000      | Hospitalized patient    | Clin_Isol              | E. faecium | Punction        | 0        | 1    |      |      |                | 18 | 7    | 1   | 1   | 1    | 5   | 1    | 1   |
| 451 | U0005          | 18 | 3          | 3             | NLD     | 2000      | Hospitalized patient    | Clin_Isol              | E. faecium | Pus             | 0        | 1    |      |      |                | 18 | 7    | 1   | 1   | 1    | 5   | 1    | 1   |
| 452 | U0011          | 18 | 3          | 3             | NLD     | 2000      | Hospitalized patient    | Clin_Isol              | E. faecium | Pus             | 1        | 1    |      |      |                | 18 | 7    | 1   | 1   | 1    | 5   | 1    | 1   |
| 453 | U0035          | 18 | 3          | 3             | NLD     | 2002      | Hospitalized patient    | Clin_Isol              | E. faecium | Wound           | 0        | 1    |      |      |                | 18 | 7    | 1   | 1   | 1    | 5   | 1    | 1   |
| 454 | U0044          | 18 | 3          | 3             | NLD     | 2002      | Hospitalized patient    | Clin_Isol              | E. faecium | Blood           | 0        | 1    |      |      |                | 18 | 7    | 1   | 1   | 1    | 5   | 1    | 1   |
| 455 | U0071          | 18 | 3          | 3             | NLD     | 2003      | Hospitalized patient    | Clin_Isol              | E. faecium | Blood           | 0        | 1    |      |      |                | 18 | 7    | 1   | 1   | 1    | 5   | 1    | 1   |
| 456 | U0094          | 18 | 3          | 3             | NLD     | 2004      | Hospitalized patient    | Hosp_Surv              | E. faecium | Faeces          | 0        | 1    |      |      |                | 18 | 7    | 1   | 1   | 1    | 5   | 1    | 1   |
| 457 | U0097          | 18 | 3          | 3             | NLD     | 2004      | Hospitalized patient    | Hosp_Surv              | E. faecium | Faeces          | 0        | 1    |      |      |                | 18 | 7    | 1   | 1   | 1    | 5   | 1    | 1   |
| 458 | U0113          | 18 | 3          | 3             | NLD     | 2004      | Hospitalized patient    | Hosp_Surv              | E. faecium | Faeces          | 0        | 1    |      |      |                | 18 | 7    | 1   | 1   | 1    | 5   | 1    | 1   |
| 459 | U0123          | 18 | 3          | 3             | NLD     | 2004      | Hospitalized patient    | Hosp_Surv              | E. faecium | Faeces          | 0        | 1    |      |      |                | 18 | 7    | 1   | 1   | 1    | 5   | 1    | 1   |
| 460 | U0147          | 18 | 3          | 3             | NLD     | 2004      | Hospitalized patient    | Hosp_Surv              | E. faecium | Faeces          | 0        | 1    |      |      |                | 18 | 7    | 1   | 1   | 1    | 5   | 1    | 1   |
| 461 | U0226          | 18 | 3          | 3             | NLD     | 1996      | Hospitalized patient    | Clin_Isol              | E. faecium | Abdominal fluid | 1        | 1    |      |      |                | 18 | 7    | 1   | 1   | 1    | 5   | 1    | 1   |
| 462 | U0254          | 18 | 3          | 3             | NLD     | 2004      | Hospitalized patient    | Hosp_Surv              | E. faecium | Faeces          | 0        | 1    |      |      |                | 18 | 7    | 1   | 1   | 1    | 5   | 1    | 1   |
| 463 | U0256          | 18 | 3          | 3             | NLD     | 2004      | Hospitalized patient    | Hosp_Surv              | E. faecium | Faeces          | 0        | 1    |      |      |                | 18 | 7    | 1   | 1   | 1    | 5   | 1    | 1   |
| 464 | W-27358/TX2016 | 18 | 3          | 3             | USA     | 1986      | Hospitalized patient    |                        |            |                 | 1        |      |      |      |                | 18 | 7    | 1   | 1   | 1    | 5   | 1    | 1   |
| 465 | A1502          | 19 | 3          | 5             | DEU     | 1997      | Hospitalized patient    | Clin_Isol              | E. faecium | blood           | 0        | 1    |      |      |                | 19 | 7    | 1   | 1   | 1    | 1   | 11   | 1   |
| 466 | E0072          | 19 | 3          | 5             | NLD     | 1995      | Hospitalized patient    | Clin_Isol              | E. faecium | Blood           | 0        | 1    |      |      |                | 19 | 7    | 1   | 1   | 1    | 1   | 11   | 1   |
| 467 | E0121          | 19 | 3          | 5             | NLD     | 1995      | Hospitalized patient    | Clin_Isol              | E. faecium | Blood           | 0        | 1    |      |      |                | 19 | 7    | 1   | 1   | 1    | 1   | 11   | 1   |
| 468 | E1584          | 19 | 3          | 5             | NLD     | 2001      | Hospitalized patient    | Clin_Isol              | E. faecium | Blood           | 0        | 1    |      |      |                | 19 | 7    | 1   | 1   | 1    | 1   | 11   | 1   |
| 469 | E1767          | 19 | 3          | 5             | BEL     | 1999      | Hospitalized patient    | Clin_Isol              | E. faecium | Pus             | 0        | 1    |      |      |                | 19 | 7    | 1   | 1   | 1    | 1   | 11   | 1   |
| 470 | E4391          | 19 | 3          | 5             | DNK     |           | Dog                     | Animal_Dog             | E. faecium | Faeces          | 0        | 1    |      |      |                | 19 | 7    | 1   | 1   | 1    | 1   | 11   | 1   |
| 471 | E4393          | 19 | 3          | 5             | DNK     |           | Dog                     | Animal_Dog             | E. faecium | Faeces          | 0        | 1    |      |      |                | 19 | 7    | 1   | 1   | 1    | 1   | 11   | 1   |
| 472 | E4394          | 19 | 3          | 5             | DNK     |           | Dog                     | Animal_Dog             | E. faecium | Faeces          | 0        | 1    |      |      |                | 19 | 7    | 1   | 1   | 1    | 1   | 11   | 1   |
| 473 | E4426          | 19 | 3          | 5             | GBR     |           | Dog                     | Animal_Dog             | E. faecium | Faeces          | 0        | 1    |      |      |                | 19 | 7    | 1   | 1   | 1    | 1   | 11   | 1   |
| 474 | E4430          | 19 | 3          | 5             | GBR     |           | Dog                     | Animal_Dog             | E. faecium | Faeces          | 0        | 1    |      |      |                | 19 | 7    | 1   | 1   | 1    | 1   | 11   | 1   |
| 475 | E4468          | 19 | 3          | 5             | NLD     | 2008      | Dog                     | Animal_Dog             | E. faecium | Faeces          | 1        | 1    |      |      |                | 19 | 7    | 1   | 1   | 1    | 1   | 11   | 1   |
| 476 | E4473          | 19 | 3          | 5             | NLD     | 2008      | Dog                     | Animal_Dog             | E. faecium | Faeces          | 1        | 1    |      |      |                | 19 | 7    | 1   | 1   | 1    | 1   | 11   | 1   |
| 477 | U0013          | 19 | 3          | 5             | NLD     | 2000      | Hospitalized patient    | Clin_Isol              | E. faecium | Wound           | 1        | 1    |      |      |                | 19 | 7    | 1   | 1   | 1    | 1   | 11   | 1   |
| 478 | U0026          | 19 | 3          | 5             | NLD     | 2001      | Hospitalized patient    | Clin_Isol              | E. faecium | Autopsy         | 0        | 1    |      |      |                | 19 | 7    | 1   | 1   | 1    | 1   | 11   | 1   |
| 479 | UWHC-4827/TX20 | 19 | 3          | 5             | USA     | 1987-1988 | Hospitalized patient    |                        |            |                 | 1        | 1    |      |      |                | 19 | 7    | 1   | 1   | 1    | 1   | 11   | 1   |
| 480 | E0300          | 20 | 2          | 4             | USA     | 1994      | Hospitalized patient    | Hospital outbreak US-1 | E. faecium | Urine           | 1        | 1    | 1    | 1    | 1              | 20 | 5    | 1   | 1   | 1    | 8   | 6    | 1   |
| 481 | E0292          | 20 | 2          | 4             | USA     | 1992      | Hospitalized patient    | Hospital outbreak US-1 | E. faecium | Urine           | 1        | 1    |      |      |                | 20 | 5    | 1   | 1   | 1    | 8   | 6    | 1   |
| 482 | E0296          | 20 | 2          | 4             | USA     | 1994      | Hospitalized patient    | Hospital outbreak US-1 | E. faecium | Urine           | 1        | 1    |      |      |                | 20 | 5    | 1   | 1   | 1    | 8   | 6    | 1   |
| 483 | E0298          | 20 | 2          | 4             | USA     | 1994      | Hospitalized patient    | Hospital outbreak US-1 | E. faecium | Blood           | 1        | 1    |      |      |                | 20 | 5    | 1   | 1   | 1    | 8   | 6    | 1   |
| 484 | E0302          | 20 | 2          | 4             | USA     | 1994      | Hospitalized patient    | Hospital outbreak US-1 | E. faecium | Faeces          | 1        | 1    |      |      |                | 20 | 5    | 1   | 1   | 1    | 8   | 6    | 1   |
| 485 | E0303          | 20 | 2          | 4             | USA     | 1994      | Hospitalized patient    | Hospital outbreak US-1 | E. faecium | Urine           | 1        | 1    |      |      |                | 20 | 5    | 1   | 1   | 1    | 8   | 6    | 1   |
| 486 | E0304          | 20 | 2          | 4             | USA     | 1994      | Hospitalized patient    | Hospital outbreak US-1 | E. faecium | Catheter        | 1        | 1    |      |      |                | 20 | 5    | 1   | 1   | 1    | 8   | 6    | 1   |
| 487 | E0305          | 20 | 2          | 4             | USA     | 1994      | Hospitalized patient    | Hospital outbreak US-1 | E. faecium | Urine           | 1        | 1    |      |      |                | 20 | 5    | 1   | 1   | 1    | 8   | 6    | 1   |
| 488 | E0316          | 20 | 2          | 4             | USA     | 1994      | Hospitalized patient    | Hospital outbreak US-1 | E. faecium | Blood           | 1        | 1    |      |      |                | 20 | 5    | 1   | 1   | 1    | 8   | 6    | 1   |
| 489 | E0319          | 20 | 2          | 4             | USA     | 1994      | Hospitalized patient    | Hospital outbreak US-1 | E. faecium | Urine           | 1        | 1    |      |      |                | 20 | 5    | 1   | 1   | 1    | 8   | 6    | 1   |
| 490 | VREH-1/TX2416  | 20 | 2          | 4             | USA     | 1992      | Hospitalized patient    |                        |            |                 | 1        |      |      |      |                | 20 | 5    | 1   | 1   | 1    | 8   | 6    | 1   |
| 491 | VREH-4/TX2419  | 20 | 2          | 4             | USA     | 1992      | Hospitalized patient    |                        |            |                 | 1        |      |      |      |                | 20 | 5    | 1   | 1   | 1    | 8   | 6    | 1   |
| 492 | E1573          | 21 | 2          | 3             | BEL     | 1994      | Bison                   | Animal_Bison           | E. faecium | Faeces          | 0        | 0    | 0    | 0    | 0              | 21 | 9    | 3   | 1   | 2    | 1   | 1    | 1   |
| 493 | E0125          | 21 | 2          | 3             | NLD     | 1995      | Hospitalized patient    | Clin_Isol              | E. faecium | Bile            | 0        | 0    | 0    | 0    | 0              | 21 | 9    | 3   | 1   | 2    | 1   | 1    | 1   |
| 494 | E0466          | 21 | 2          | 3             | NLD     | 1996      | Cat                     | Animal_Cat             | E. faecium | Faeces          | 0        | 0    | 0    | 0    | 0              | 21 | 9    | 3   | 1   | 2    | 1   | 1    | 1   |
| 495 | E0849          | 21 | 2          | 3             | NLD     | 2000      | Hospitalized patient    | Hosp_Surv              | E. faecium | Faeces          | 0        | 0    | 0    | 0    | 0              | 21 | 9    | 3   | 1   | 2    | 1   | 1    | 1   |
| 496 | A0865          | 21 | 2          | 3             | DEU     | 1992      | Non-hospitalized person | Comm_Surv              | E. faecium | human faeces    | 0        | 0    |      |      |                | 21 | 9    | 3   | 1   | 2    | 1   | 1    | 1   |
| 497 | E0074          | 21 | 2          | 3             | NLD     | 1995      | Hospitalized patient    | Clin_Isol              | E. faecium |                 | 0        | 0    |      |      |                | 21 | 9    | 3   | 1   | 2    | 1   | 1    | 1   |
| 498 | E0202          | 21 | 2          | 3             | NLD     | 1996      | Calf                    | Animal_Calf            | E. faecium | Faeces          | 0        | 0    |      |      |                | 21 | 9    | 3   | 1   | 2    | 1   | 1    | 1   |
| 499 | E1069          | 21 | 2          | 3             | NLD     | 2000      | Hospitalized patient    | Hosp_Surv              | E. faecium | Faeces          | 0        | 0    |      |      |                | 21 | 9    | 3   | 1   | 2    | 1   | 1    | 1   |
| 500 | E2364          | 21 | 2          | 3             | DEU     | 1997      | Non-hospitalized person | Comm_Surv              | E. faecium | Faeces          | 0        | 0    |      |      |                | 21 | 9    | 3   | 1   | 2    | 1   | 1    | 1   |
| 501 | E1623          | 22 | 3          | 1             | NLD     | 1960      | Hospitalized patient    | Clin_Isol              | E. faecium | Pus             | 0        | 0    |      |      | 0              | 22 | 2    | 3   | 1   | 2    | 1   | 1    | 1   |
| 502 | E1625          | 22 | 3          | 1             | NLD     | 1961      | Hospitalized patient    | Clin_Isol              | E. faecium | Liquor          | 0        | 0    | 0    | 0    | 0              | 22 | 2    | 3   | 1   | 2    | 1   | 1    | 1   |
| 503 | E0073          | 22 | 3          | 1             | NLD     | 1995      | Hospitalized patient    | Clin_Isol              | E. faecium | Faeces          | 0        | 0    | 0    | 0    | 0              | 22 | 2    | 3   | 1   | 2    | 1   | 1    | 1   |
| 504 | A0037          | 22 | 3          | 1             | ITA     |           | Cheese                  | Animal_Food            | E. faecium | Food            |          |      |      |      |                | 22 | 2    | 3   | 1   | 2    | 1   | 1    | 1   |



Supplementary Table 1. Meta-data of isolates included in this study

| No  | Strain code     | ST | BAPS group | BAPS subgroup | country | year      | Source                  | Epidemiology   | Species    | Isol_site        | esp_gene | ampR | SgrA | EcbA | Genomic island | ST | AtpA | Ddl | Gdh | PurK | Gyd | PstS | Adk |   |
|-----|-----------------|----|------------|---------------|---------|-----------|-------------------------|----------------|------------|------------------|----------|------|------|------|----------------|----|------|-----|-----|------|-----|------|-----|---|
| 505 | A0038           | 22 | 3          | 1             | ITA     |           | Cheese                  | Animal_Food    | E. faecium | Food             |          |      |      |      | 22             | 2  | 3    | 1   | 2   | 1    | 1   | 1    | 1   |   |
| 506 | A1047           | 22 | 3          | 1             | DEU     | 1994      | Hospitalized patient    |                | E. faecium |                  |          |      |      |      | 22             | 2  | 3    | 1   | 2   | 1    | 1   | 1    | 1   |   |
| 507 | A1156           | 22 | 3          | 1             | ITA     | 2005      | Hospitalized patient    | Clin_isol      | E. faecium | Blood            | 0        | 0    |      |      | 22             | 2  | 3    | 1   | 2   | 1    | 1   | 1    | 1   |   |
| 508 | A2186           | 22 | 3          | 1             |         |           | Pig                     | Animal_Pig     | E. faecium | Faeces           |          |      |      |      | 22             | 2  | 3    | 1   | 2   | 1    | 1   | 1    | 1   |   |
| 509 | E0122           | 22 | 3          | 1             | NLD     | 1995      | Hospitalized patient    | Clin_Isol      | E. faecium | Urine            | 0        | 0    |      |      | 22             | 2  | 3    | 1   | 2   | 1    | 1   | 1    | 1   |   |
| 510 | E0126           | 22 | 3          | 1             | NLD     | 1996      | Hospitalized patient    | Clin_Isol      | E. faecium | Ascites          | 0        | 0    |      |      | 22             | 2  | 3    | 1   | 2   | 1    | 1   | 1    | 1   |   |
| 511 | E0749           | 22 | 3          | 1             | NLD     | 2000      | Hospitalized patient    | Hosp_Surv      | E. faecium | Faeces           | 0        | 0    |      |      | 22             | 2  | 3    | 1   | 2   | 1    | 1   | 1    | 1   |   |
| 512 | E1272           | 22 | 3          | 1             | FRA     |           | Hospitalized patient    | Clin_Isol      | E. faecium | Blood            | 0        | 0    |      |      | 22             | 2  | 3    | 1   | 2   | 1    | 1   | 1    | 1   |   |
| 513 | E1510           | 22 | 3          | 1             | ESP     | 1995      | Hospitalized patient    | Clin_Isol      | E. faecium | Blood            | 0        | 0    |      |      | 22             | 2  | 3    | 1   | 2   | 1    | 1   | 1    | 1   |   |
| 514 | E1852           | 22 | 3          | 1             | ESP     | 2001      | Hospitalized patient    | Hosp_Surv      | E. faecium | Faeces           |          | 0    |      |      | 22             | 2  | 3    | 1   | 2   | 1    | 1   | 1    | 1   |   |
| 515 | E2040           | 22 | 3          | 1             | DEU     | 2000      | Hospitalized patient    |                | E. faecium | WA               | 1        |      |      |      | 22             | 2  | 3    | 1   | 2   | 1    | 1   | 1    | 1   |   |
| 516 | E2083           | 22 | 3          | 1             | DNK     | 2001      | Pig                     | Animal_pig     | E. faecium |                  |          | 0    |      |      | 22             | 2  | 3    | 1   | 2   | 1    | 1   | 1    | 1   |   |
| 517 | E0461           | 23 | 3          | 1             | NLD     | 1996      | Dog                     | Animal_Dog     | E. faecium | Faeces           | 0        | 0    |      |      | 23             | 2  | 3    | 1   | 2   | 1    | 1   | 1    | 7   |   |
| 518 | E0462           | 24 | 3          | 1             | NLD     | 1996      | Dog                     | Animal_Dog     | E. faecium | Faeces           | 0        | 0    |      |      | 24             | 2  | 3    | 1   | 7   | 1    | 1   | 1    | 1   |   |
| 519 | E0005           | 25 | 2          | 3             | FRA     | 1986      | Hospitalized patient    | Hosp_Surv      | E. faecium | Faeces           | 0        | 0    |      | 1    | 25             | 9  | 3    | 1   | 6   | 1    | 1   | 1    | 1   |   |
| 520 | E1250           | 25 | 2          | 3             | CHE     |           | Hospitalized patient    | Clin_Isol      | E. faecium | Blood            | 0        | 0    | 0    | 0    | 25             | 9  | 3    | 1   | 6   | 1    | 1   | 1    | 1   |   |
| 521 | A1034           | 25 | 2          | 3             | DEU     | 1986      | Hospitalized patient    |                | E. faecium |                  |          |      |      | 25   | 9              | 3  | 1    | 6   | 1   | 1    | 1   | 1    | 1   |   |
| 522 | A1043           | 25 | 2          | 3             | DEU     | 1991      | Hospitalized patient    |                | E. faecium |                  |          |      |      | 25   | 9              | 3  | 1    | 6   | 1   | 1    | 1   | 1    | 1   |   |
| 523 | A1380           | 25 | 2          | 3             | CHN     | 2004      | Hospitalized patient    | Clin_Isol      | E. faecium | Blood            | 0        | 0    |      |      | 25             | 9  | 3    | 1   | 6   | 1    | 1   | 1    | 1   |   |
| 524 | A1541           | 25 | 2          | 3             | DEU     | 2002      | Hospitalized patient    | Clin_Isol      | E. faecium | blood            | 0        | 1    |      |      | 25             | 9  | 3    | 1   | 6   | 1    | 1   | 1    | 1   |   |
| 525 | E0119           | 25 | 2          | 3             | NLD     | 1995      | Hospitalized patient    | Clin_Isol      | E. faecium | Wound            | 0        | 0    |      |      | 25             | 9  | 3    | 1   | 6   | 1    | 1   | 1    | 1   |   |
| 526 | E1196           | 25 | 2          | 3             | CHE     |           | Hospitalized patient    | Clin_Isol      | E. faecium | Blood            | 0        | 0    |      |      | 25             | 9  | 3    | 1   | 6   | 1    | 1   | 1    | 1   |   |
| 527 | E1273           | 25 | 2          | 3             | FRA     |           | Hospitalized patient    | Clin_Isol      | E. faecium | Blood            | 0        | 1    |      |      | 25             | 9  | 3    | 1   | 6   | 1    | 1   | 1    | 1   |   |
| 528 | E1770           | 25 | 2          | 3             | BEL     | 1996      | Hospitalized patient    | Hosp_Surv      | E. faecium | Faeces           | 0        | 0    |      |      | 25             | 9  | 3    | 1   | 6   | 1    | 1   | 1    | 1   |   |
| 529 | NEDH 758/TX2052 | 25 | 2          | 3             | USA     | 1973      | Hospitalized patient    |                | E. faecium |                  |          | 1    |      |      | 25             | 9  | 3    | 1   | 6   | 1    | 1   | 1    | 1   |   |
| 530 | U0220           | 25 | 2          | 3             | NLD     | 1996      | Hospitalized patient    | Clin_Isol      | E. faecium | Blood            | 1        | 1    |      |      | 25             | 9  | 3    | 1   | 6   | 1    | 1   | 1    | 1   |   |
| 531 | UWHC-112/TX204  | 25 | 2          | 3             | USA     | 1987-1988 | Hospitalized patient    |                | E. faecium |                  |          | 1    |      |      | 25             | 9  | 3    | 1   | 6   | 1    | 1   | 1    | 1   |   |
| 532 | UWHC-9802/TX20  | 25 | 2          | 3             | USA     | 1987-1988 | Hospitalized patient    |                | E. faecium |                  |          | 1    |      |      | 25             | 9  | 3    | 1   | 6   | 1    | 1   | 1    | 1   |   |
| 533 | A1746           | 26 | 2          | 1             | USA     | 2005      |                         |                | E. faecium |                  |          |      |      |      | 26             | 9  | 2    | 1   | 6   | 1    | 1   | 1    | 1   |   |
| 534 | A2204           | 26 | 2          | 1             |         |           | Poultry                 | Animal_Poultry | E. faecium | Faeces           |          |      |      |      | 26             | 9  | 2    | 1   | 6   | 1    | 1   | 1    | 1   |   |
| 535 | E0164           | 26 | 2          | 1             | NLD     | 1996      | Poultry                 | Animal_Poultry | E. faecium | Faeces           | 0        | 0    |      |      | 26             | 9  | 2    | 1   | 6   | 1    | 1   | 1    | 1   |   |
| 536 | E1185           | 26 | 2          | 1             | FRA     |           | Hospitalized patient    | Clin_Isol      | E. faecium | Blood            | 0        | 0    |      |      | 26             | 9  | 2    | 1   | 6   | 1    | 1   | 1    | 1   |   |
| 537 | E1268           | 26 | 2          | 1             | FRA     |           | Hospitalized patient    | Clin_Isol      | E. faecium | Blood            | 0        | 0    |      |      | 26             | 9  | 2    | 1   | 6   | 1    | 1   | 1    | 1   |   |
| 538 | E0463           | 27 | 3          | 3             | NLD     | 1996      | Dog                     | Animal_Dog     | E. faecium | Faeces           | 0        | 0    | 1    | 0    | 0              | 27 | 2    | 7   | 5   | 7    | 1   | 1    | 1   | 1 |
| 539 | E1574           | 27 | 3          | 3             | BEL     | 1995      | Dog                     | Animal_Dog     | E. faecium | Faeces           | 0        | 0    | 1    | 0    | 0              | 27 | 2    | 7   | 5   | 7    | 1   | 1    | 1   | 1 |
| 540 | E0120           | 27 | 3          | 3             | NLD     | 1995      | Hospitalized patient    | Clin_Isol      | E. faecium | Ascites          | 0        | 0    |      |      | 27             | 2  | 7    | 5   | 7   | 1    | 1   | 1    | 1   |   |
| 541 | E0203           | 27 | 3          | 3             | NLD     | 1996      | Calf                    | Animal_Calf    | E. faecium | Faeces           | 0        | 0    |      |      | 27             | 2  | 7    | 5   | 7   | 1    | 1   | 1    | 1   |   |
| 542 | E2071           | 27 | 3          | 3             | DNK     | 2001      | Poultry                 | Animal_Poultry | E. faecium |                  |          |      |      | 27   | 2              | 7  | 5    | 7   | 1   | 1    | 1   | 1    | 1   |   |
| 543 | E0467           | 28 | 3          | 3             | NLD     | 1996      | Cat                     | Animal_Cat     | E. faecium | Faeces           | 0        | 0    |      |      | 28             | 2  | 7    | 5   | 6   | 1    | 1   | 1    | 1   |   |
| 544 | A0019           | 29 | 3          | 2             | AUS     | 1999      | Hospitalized patient    | Clin_Isol      | E. faecium | Blood            |          |      |      |      | 29             | 4  | 5    | 1   | 3   | 1    | 1   | 1    | 1   |   |
| 545 | E1778           | 29 | 3          | 2             | BEL     | 2001      | Pig                     | Animal_pig     | E. faecium | Faeces           | 0        | 0    |      |      | 29             | 4  | 5    | 1   | 3   | 1    | 1   | 1    | 1   |   |
| 546 | E4182           | 29 | 3          | 2             | FRA     | 2003      | Non-hospitalized person | Comm_Surv      | E. faecium | Faeces           |          | 1    |      |      | 29             | 4  | 5    | 1   | 3   | 1    | 1   | 1    | 1   |   |
| 547 | A0021           | 30 | 2          | 3             | AUS     | 1995      | Hospitalized patient    | Clin_Isol      | E. faecium | Blood            |          |      |      |      | 30             | 5  | 3    | 1   | 6   | 2    | 2   | 1    | 1   |   |
| 548 | A0012           | 31 | 3          | 1             | AUS     | 1996      | Non-hospitalized person | Clin_Isol      | E. faecium |                  |          |      |      | 31   | 1              | 3  | 1    | 1   | 1   | 1    | 1   | 3    |     |   |
| 549 | E1071           | 32 | 3          | 1             | NLD     | 2000      | Hospitalized patient    | Hosp_Surv      | E. faecium | Faeces           | 0        | 0    | 0    | 0    | 0              | 32 | 3    | 3   | 1   | 2    | 1   | 1    | 1   | 1 |
| 550 | A0016           | 32 | 3          | 1             | AUS     | 1999      | Non-hospitalized person | Comm_Surv      | E. faecium |                  |          |      |      | 32   | 3              | 3  | 1    | 2   | 1   | 1    | 1   | 1    | 1   |   |
| 551 | A0240           | 32 | 3          | 1             | NLD     |           |                         |                | E. faecium |                  |          |      |      | 32   | 3              | 3  | 1    | 2   | 1   | 1    | 1   | 1    | 1   |   |
| 552 | A2192           | 32 | 3          | 1             |         |           | Pig                     | Animal_Pig     | E. faecium | Faeces           |          |      |      |      | 32             | 3  | 3    | 1   | 2   | 1    | 1   | 1    | 1   |   |
| 553 | D0539           | 32 | 3          | 1             | NLD     | 1997      | Poultry                 | Animal_Poultry | E. faecium | Faeces           | 0        | 0    |      |      | 32             | 3  | 3    | 1   | 2   | 1    | 1   | 1    | 1   |   |
| 554 | E1488           | 32 | 3          | 1             | ESP     | 2000      | Non-hospitalized person | Comm_Surv      | E. faecium | Faeces           | 0        | 0    | 0    | 0    | 0              | 32 | 3    | 3   | 1   | 2    | 1   | 1    | 1   | 1 |
| 555 | E1855           | 32 | 3          | 1             | ESP     | 2001      | Hospitalized patient    | Hosp_Surv      | E. faecium | Faeces           |          | 0    |      |      | 32             | 3  | 3    | 1   | 2   | 1    | 1   | 1    | 1   |   |
| 556 | E1860           | 32 | 3          | 1             | ESP     | 2001      | Hospitalized patient    | Hosp_Surv      | E. faecium | Faeces           |          | 0    |      |      | 32             | 3  | 3    | 1   | 2   | 1    | 1   | 1    | 1   |   |
| 557 | E4133           | 32 | 3          | 1             | GBR     | 1987      | Hospitalized patient    | Clin_Isol      | E. faecium | Blood            | 0        | 0    |      |      | 32             | 3  | 3    | 1   | 2   | 1    | 1   | 1    | 1   |   |
| 558 | A0013           | 33 | 3          | 1             | AUS     | 1999      | Hospitalized patient    | Clin_Isol      | E. faecium | Blood            |          |      |      |      | 33             | 2  | 3    | 1   | 2   | 1    | 5   | 1    | 1   |   |
| 559 | A0015           | 34 | 3          | 1             | AUS     | 1999      | Environment             | Environment    | E. faecium |                  |          |      |      | 34   | 3              | 3  | 1    | 2   | 2   | 1    | 1   | 1    | 1   |   |
| 560 | A0017           | 35 | 3          | 1             | AUS     | 2000      | Environment             | Environment    | E. faecium |                  |          |      |      | 35   | 3              | 3  | 1    | 6   | 1   | 1    | 1   | 1    | 1   |   |
| 561 | A0018           | 35 | 3          | 1             | AUS     | 2000      | Environment             | Environment    | E. faecium |                  |          |      |      | 35   | 3              | 3  | 1    | 6   | 1   | 1    | 1   | 1    | 1   |   |
| 562 | A0014           | 36 | 3          | 1             | AUS     | 1999      | Environment             | Environment    | E. faecium |                  |          |      |      | 36   | 2              | 3  | 2    | 2   | 3   | 1    | 1   | 1    | 1   |   |
| 563 | A0020           | 37 | 2          | 3             | AUS     | 2000      | Environment             | Environment    | E. faecium |                  |          |      |      | 37   | 9              | 7  | 5    | 7   | 1   | 8    | 1   | 1    | 1   |   |
| 564 | A0022           | 38 | 3          | 5             | AUS     | 1999      | Hospitalized patient    | Clin_Isol      | E. faecium | Peritoneal fluid |          |      |      | 38   | 2              | 5  | 3    | 5   | 4   | 4    | 1   | 1    | 1   |   |
| 565 | A0024           | 39 | 1          |               | AUS     | 1999      | Hospitalized patient    | Clin_Isol      | E. faecium | Tissue           |          |      |      | 39   | 6              | 6  | 4    | 4   | 3   | 3    | 2   | 1    | 1   |   |
| 566 | A0246           | 39 | 1          |               | NLD     |           |                         |                | E. faecium |                  |          |      |      | 39   | 6              | 6  | 4    | 4   | 3   | 3    | 2   | 1    | 1   |   |
| 567 | A0023           | 40 | 1          |               | AUS     | 2000      | Environment             | Environment    | E. faecium |                  |          |      |      | 40   | 10             | 8  | 8    | 8   | 6   | 10   | 6   | 1    | 6   |   |

Supplementary Table 1. Meta-data of isolates included in this study

| No  | Strain code | ST | BAPS group | BAPS subgroup | country | year | Source                  | Epidemiology             | Species    | Isol_site | esp_gene | ampR | SgrA | EcbA | Genomic island | ST | AtpA | Ddl | Gdh | PurK | Gyd | PstS | Adk |
|-----|-------------|----|------------|---------------|---------|------|-------------------------|--------------------------|------------|-----------|----------|------|------|------|----------------|----|------|-----|-----|------|-----|------|-----|
| 568 | E1222       | 41 | 2          | 3             | NLD     | 1996 | Calf                    | Animal_Calf              | E. faecium | Faeces    | 0        | 0    |      |      |                | 41 | 8    | 4   | 5   | 3    | 1   | 1    | 5   |
| 569 | E1225       | 41 | 2          | 3             | NLD     | 1996 | Calf                    | Animal_Calf              | E. faecium | Faeces    | 0        | 0    |      |      |                | 41 | 8    | 4   | 5   | 3    | 1   | 1    | 5   |
| 570 | E1039       | 42 | 2          | 3             | NLD     | 1998 | Non-hospitalized person | Comm_Surv                | E. faecium | Faeces    | 0        | 0    | 0    | 0    | 0              | 42 | 17   | 4   | 1   | 13   | 1   | 1    | 5   |
| 571 | A0040       | 43 | 3          | 3             | ITA     |      | Meat                    | Animal_Food              | E. faecium | Food      |          |      |      |      |                | 43 | 3    | 4   | 5   | 7    | 1   | 1    | 5   |
| 572 | E1224       | 43 | 3          | 3             | NLD     | 1996 | Calf                    | Animal_Calf              | E. faecium | Faeces    | 0        | 0    |      |      |                | 43 | 3    | 4   | 5   | 7    | 1   | 1    | 5   |
| 573 | E0788       | 44 | 3          | 3             | NLD     | 2000 | Hospitalized patient    | Hosp_Surv                | E. faecium | Faeces    | 0        | 0    |      |      |                | 44 | 3    | 2   | 12  | 9    | 1   | 1    | 5   |
| 574 | E1221       | 44 | 3          | 3             | NLD     | 1996 | Calf                    | Animal_Calf              | E. faecium | Faeces    | 0        | 0    |      |      |                | 44 | 3    | 2   | 12  | 9    | 1   | 1    | 5   |
| 575 | D0363       | 45 | 2          | 1             | NLD     | 1999 | Pig                     | Animal_Pig               | E. faecium | Faeces    | 0        | 0    |      |      |                | 45 | 5    | 5   | 1   | 6    | 1   | 1    | 5   |
| 576 | D0166       | 46 | 2          | 1             | NLD     | 1999 | Hospitalized patient    | Hosp_Surv                | E. faecium | Faeces    | 0        | 0    |      |      |                | 46 | 5    | 2   | 1   | 11   | 1   | 14   | 6   |
| 577 | E0996       | 47 | 2          | 1             | NLD     | 1998 | Non-hospitalized person | Comm_Surv                | E. faecium | Faeces    | 0        | 0    |      |      |                | 47 | 9    | 2   | 1   | 11   | 1   | 14   | 5   |
| 578 | A2201       | 48 | 2          | 1             |         |      | Poultry                 | Animal_Poultry           | E. faecium | Faeces    |          |      |      |      |                | 48 | 9    | 2   | 1   | 6    | 1   | 16   | 1   |
| 579 | D0532       | 48 | 2          | 1             | NLD     | 1997 | Poultry                 | Animal_Poultry           | E. faecium | Faeces    | 0        | 0    |      |      |                | 48 | 9    | 2   | 1   | 6    | 1   | 16   | 1   |
| 580 | A2189       | 49 | 2          | 1             |         |      | Pig                     | Animal_Pig               | E. faecium | Faeces    |          |      |      |      |                | 49 | 15   | 2   | 12  | 6    | 1   | 1    | 1   |
| 581 | D0365       | 49 | 2          | 1             | NLD     | 1999 | Pig                     | Animal_Pig               | E. faecium | Faeces    | 0        | 0    |      |      |                | 49 | 15   | 2   | 12  | 6    | 1   | 1    | 1   |
| 582 | E0772       | 50 | 2          | 1             | NLD     | 2000 | Hospitalized patient    | Hospital outbreak NL-2-2 | E. faecium | Faeces    | 0        | 1    | 1    | 0    | 0              | 50 | 15   | 1   | 6   | 6    | 1   | 1    | 1   |
| 583 | E1554       | 50 | 2          | 1             | NLD     | 2002 | Hospitalized patient    | Hosp_Surv                | E. faecium | Faeces    | 0        | 1    | 1    | 0    | 0              | 50 | 15   | 1   | 6   | 6    | 1   | 1    | 1   |
| 584 | E0774       | 50 | 2          | 1             | NLD     | 2000 | Hospitalized patient    | Hospital outbreak NL-2-2 | E. faecium | Faeces    | 0        | 1    |      |      |                | 50 | 15   | 1   | 6   | 6    | 1   | 1    | 1   |
| 585 | E1293       | 50 | 2          | 1             | ITA     |      | Hospitalized patient    | Clin_Isol                | E. faecium | Blood     | 0        | 1    |      |      |                | 50 | 15   | 1   | 6   | 6    | 1   | 1    | 1   |
| 586 | E1320       | 50 | 2          | 1             | ITA     | 1999 | Hospitalized patient    | Clin_Isol                | E. faecium | Bile      | 1        | 1    |      |      |                | 50 | 15   | 1   | 6   | 6    | 1   | 1    | 1   |
| 587 | E2041       | 50 | 2          | 1             | DEU     | 2000 | Hospitalized patient    |                          | E. faecium | WA        |          |      |      |      |                | 50 | 15   | 1   | 6   | 6    | 1   | 1    | 1   |
| 588 | E4179       | 50 | 2          | 1             | FRA     | 2003 | Non-hospitalized person | Comm_Surv                | E. faecium | Faeces    |          | 1    |      |      |                | 50 | 15   | 1   | 6   | 6    | 1   | 1    | 1   |
| 589 | D0534       | 51 | 2          | 1             | NLD     | 1997 | Poultry                 | Animal_Poultry           | E. faecium | Faeces    |          |      |      |      |                | 51 | 16   | 2   | 7   | 6    | 2   | 1    | 1   |
| 590 | D0161       | 52 | 3          | 5             | NLD     | 1999 | Hospitalized patient    | Hosp_Surv                | E. faecium | Faeces    | 0        | 0    |      |      |                | 52 | 12   | 9   | 6   | 3    | 1   | 13   | 1   |
| 591 | E2563       | 52 | 3          | 5             | NLD     | 2004 | Hospitalized patient    | Clin_Isol                | E. faecium | Blood     | 0        | 0    |      |      |                | 52 | 12   | 9   | 6   | 3    | 1   | 13   | 1   |
| 592 | D0531       | 53 | 3          | 3             | NLD     | 1997 | Poultry                 | Animal_Poultry           | E. faecium | Faeces    | 0        | 1    |      |      |                | 53 | 3    | 2   | 6   | 3    | 1   | 7    | 1   |
| 593 | E0676       | 53 | 3          | 3             | ESP     |      | Poultry                 | Animal_Poultry           | E. faecium | Faeces    | 0        | 0    |      |      |                | 53 | 3    | 2   | 6   | 3    | 1   | 7    | 1   |
| 594 | E1002       | 54 | 3          | 5             | NLD     | 1998 | Non-hospitalized person | Comm_Surv                | E. faecium | Faeces    | 0        | 0    | 1    | 0    | 0              | 54 | 2    | 9   | 6   | 6    | 1   | 11   | 1   |
| 595 | E1192       | 54 | 3          | 5             | PRT     |      | Hospitalized patient    | Clin_Isol                | E. faecium | Blood     | 0        | 0    |      |      |                | 54 | 2    | 9   | 6   | 6    | 1   | 11   | 1   |
| 596 | D0540       | 55 | 3          | 3             | NLD     | 1997 | Poultry                 | Animal_Poultry           | E. faecium | Faeces    | 0        | 0    |      |      |                | 55 | 2    | 1   | 1   | 2    | 1   | 1    | 1   |
| 597 | E1028       | 56 | 2          | 3             | NLD     | 1998 | Non-hospitalized person | Comm_Surv                | E. faecium | Faeces    | 0        | 0    | 1    | 0    | 0              | 56 | 5    | 3   | 1   | 6    | 1   | 1    | 1   |
| 598 | D0159       | 57 | 3          | 2             | NLD     | 1999 | Hospitalized patient    | Hosp_Surv                | E. faecium | Faeces    | 0        | 0    |      |      |                | 57 | 4    | 3   | 1   | 3    | 1   | 1    | 1   |
| 599 | E1678       | 57 | 3          | 2             | BRA     |      | Hospitalized patient    | Hosp_surv                | E. faecium | Faeces    | 0        | 1    |      |      |                | 57 | 4    | 3   | 1   | 3    | 1   | 1    | 1   |
| 600 | D0544       | 58 | 2          | 3             | NLD     | 1997 | Poultry                 | Animal_Poultry           | E. faecium | Faeces    | 0        | 0    |      |      |                | 58 | 5    | 3   | 11  | 6    | 2   | 16   | 1   |
| 601 | D0307       | 59 | 3          | 4             | NLD     | 1999 | Non-hospitalized person | Comm_Surv                | E. faecium | Faeces    | 0        | 0    |      |      |                | 59 | 14   | 4   | 10  | 6    | 1   | 15   | 5   |
| 602 | E1582       | 59 | 3          | 4             | BEL     | 2001 | Non-hospitalized person | Comm_Surv                | E. faecium | Faeces    | 0        | 0    | 0    | 0    | 0              | 59 | 14   | 4   | 10  | 6    | 1   | 15   | 5   |
| 603 | D0302       | 60 | 1          |               | NLD     | 1999 | Non-hospitalized person | Comm_Surv                | E. faecium | Faeces    | 0        | 0    |      |      |                | 60 | 13   | 8   | 8   | 8    | 11  | 10   | 6   |
| 604 | E1007       | 61 | 1          |               | NLD     | 1998 | Non-hospitalized person | Comm_Surv                | E. faecium | Faeces    | 0        | 0    |      |      |                | 61 | 13   | 8   | 8   | 8    | 6   | 17   | 6   |
| 605 | E1333       | 61 | 1          |               | NLD     |      | Non-hospitalized person | Comm_Surv                | E. faecium | Faeces    | 0        | 0    |      |      |                | 61 | 13   | 8   | 8   | 8    | 6   | 17   | 6   |
| 606 | D0154       | 62 | 1          |               | NLD     | 1999 | Hospitalized patient    | Hosp_Surv                | E. faecium | Faeces    | 0        |      |      |      |                | 62 | 11   | 8   | 9   | 10   | 10  | 9    | 6   |
| 607 | E1460       | 63 | 3          | 3             | ESP     | 1999 | Hospitalized patient    | Clin_Isol                | E. faecium | Blood     | 1        | 1    |      |      |                | 63 | 1    | 1   | 1   | 21   | 1   | 1    | 1   |
| 608 | E1739       | 63 | 3          | 3             | ESP     | 2000 | Hospitalized patient    | Clin_Isol                | E. faecium | Blood     | 1        | 1    |      |      |                | 63 | 1    | 1   | 1   | 21   | 1   | 1    | 1   |
| 609 | A1389       | 64 | 3          | 3             | CHN     | 2007 | Hospitalized patient    | Clin_Isol                | E. faecium | Urine     | 0        | 1    |      |      |                | 64 | 7    | 1   | 1   | 1    | 1   | 1    | 1   |
| 610 | E1392       | 64 | 3          | 3             | GBR     | 2000 | Hospitalized patient    | Clin_Isol                | E. faecium | Faeces    | 1        | 1    |      |      |                | 64 | 7    | 1   | 1   | 1    | 1   | 1    | 1   |
| 611 | E1422       | 64 | 3          | 3             | GBR     | 1997 | Hospitalized patient    | Clin_Isol                | E. faecium | Faeces    | 1        | 1    |      |      |                | 64 | 7    | 1   | 1   | 1    | 1   | 1    | 1   |
| 612 | E4142       | 64 | 3          | 3             | GBR     | 1992 | Hospitalized patient    | Clin_Isol                | E. faecium | Blood     | 1        | 1    |      |      |                | 64 | 7    | 1   | 1   | 1    | 1   | 1    | 1   |
| 613 | E4150       | 64 | 3          | 3             | GBR     | 1995 | Hospitalized patient    | Clin_Isol                | E. faecium | Blood     | 0        | 1    |      |      |                | 64 | 7    | 1   | 1   | 1    | 1   | 1    | 1   |
| 614 | E4155       | 64 | 3          | 3             | GBR     | 1998 | Hospitalized patient    | Clin_Isol                | E. faecium | Blood     | 1        | 1    |      |      |                | 64 | 7    | 1   | 1   | 1    | 1   | 1    | 1   |
| 615 | E4161       | 64 | 3          | 3             | GBR     | 1999 | Hospitalized patient    | Clin_Isol                | E. faecium | Blood     | 1        | 1    |      |      |                | 64 | 7    | 1   | 1   | 1    | 1   | 1    | 1   |
| 616 | E1435       | 65 | 3          | 3             | GRC     | 1999 | Hospitalized patient    | Hospital outbreak GR-3   | E. faecium | Blood     | 1        | 1    | 1    | 1    | 1              | 65 | 1    | 2   | 1   | 20   | 1   | 1    | 9   |
| 617 | A0866       | 65 | 3          | 3             | DEU     | 2004 | Hospitalized patient    | Hosp_Surv                | E. faecium | anal swab | 1        | 1    |      |      |                | 65 | 1    | 2   | 1   | 20   | 1   | 1    | 9   |
| 618 | A1016       | 65 | 3          | 3             | DEU     | 2004 | Hospitalized patient    | Hosp_Surv                | E. faecium | anal swab | 1        | 1    |      |      |                | 65 | 1    | 2   | 1   | 20   | 1   | 1    | 9   |
| 619 | A1532       | 65 | 3          | 3             | DEU     | 2000 | Hospitalized patient    | Clin_Isol                | E. faecium | blood     | 1        | 1    |      |      |                | 65 | 1    | 2   | 1   | 20   | 1   | 1    | 9   |
| 620 | A1537       | 65 | 3          | 3             | DEU     | 2001 | Hospitalized patient    | Clin_Isol                | E. faecium | blood     | 1        | 1    |      |      |                | 65 | 1    | 2   | 1   | 20   | 1   | 1    | 9   |
| 621 | E1438       | 65 | 3          | 3             | GRC     | 1999 | Hospitalized patient    | Hospital outbreak GR-3   | E. faecium | Blood     | 1        | 1    |      |      |                | 65 | 1    | 2   | 1   | 20   | 1   | 1    | 9   |
| 622 | E1527       | 65 | 3          | 3             | AUT     |      | Hospitalized patient    | Clin_Isol                | E. faecium | nd        | 1        | 1    |      |      |                | 65 | 1    | 2   | 1   | 20   | 1   | 1    | 9   |
| 623 | E1528       | 65 | 3          | 3             | AUT     |      | Hospitalized patient    | Clin_Isol                | E. faecium | nd        | 1        | 1    |      |      |                | 65 | 1    | 2   | 1   | 20   | 1   | 1    | 9   |
| 624 | E1991       | 65 | 3          | 3             | DEU     | 2001 | Hospitalized patient    |                          | E. faecium | Gewebe    |          |      |      |      |                | 65 | 1    | 2   | 1   | 20   | 1   | 1    | 9   |
| 625 | E2032       | 65 | 3          | 3             | DEU     | 2000 | Hospitalized patient    |                          | E. faecium | Galle     |          |      |      |      |                | 65 | 1    | 2   | 1   | 20   | 1   | 1    | 9   |
| 626 | E2035       | 65 | 3          | 3             | DEU     | 2000 | Hospitalized patient    |                          | E. faecium | BK        |          |      |      |      |                | 65 | 1    | 2   | 1   | 20   | 1   | 1    | 9   |
| 627 | E2045       | 65 | 3          | 3             | DEU     | 2001 | Hospitalized patient    |                          | E. faecium | BK        |          |      |      |      |                | 65 | 1    | 2   | 1   | 20   | 1   | 1    | 9   |
| 628 | E2046       | 65 | 3          | 3             | DEU     | 2001 | Hospitalized patient    |                          | E. faecium | WA        |          |      |      |      |                | 65 | 1    | 2   | 1   | 20   | 1   | 1    | 9   |
| 629 | U0252       | 65 | 3          | 3             | NLD     | 2004 | Hospitalized patient    | Clin_Isol                | E. faecium | Urine     | 1        | 1    |      |      |                | 65 | 1    | 2   | 1   | 20   | 1   | 1    | 9   |
| 630 | U0263       | 65 | 3          | 3             | NLD     | 2004 | Hospitalized patient    | Clin_Isol                | E. faecium | Pus       | 1        | 1    |      |      |                | 65 | 1    | 2   | 1   | 20   | 1   | 1    | 9   |

Supplementary Table 1. Meta-data of isolates included in this study

| No  | Strain code  | ST | BAPS group | BAPS subgroup | country | year      | Source               | Epidemiology           | Species    | Isol_site          | esp_gene | ampR | SgrA | EcbA | Genomic island | ST | AtpA | Ddl | Gdh | PurK | Gyd | PstS | Adk |
|-----|--------------|----|------------|---------------|---------|-----------|----------------------|------------------------|------------|--------------------|----------|------|------|------|----------------|----|------|-----|-----|------|-----|------|-----|
| 631 | E1627        | 66 | 2          | 1             | NLD     | 1979      | Hospitalized patient | Hosp_surv              | E. faecium | Faeces             | 0        | 0    | 0    | 0    | 0              | 66 | 9    | 5   | 1   | 3    | 1   | 1    | 1   |
| 632 | E1634        | 66 | 2          | 1             | NLD     | 1982      | River water          | Environment            | E. faecium | Environment        | 0        | 0    | 0    | 0    | 0              | 66 | 9    | 5   | 1   | 3    | 1   | 1    | 1   |
| 633 | E1620        | 67 | 2          | 3             | NLD     | 1957      | Hospitalized patient | Clin_Isol              | E. faecium | Blood              | 0        | 0    | 0    | 0    | 0              | 67 | 5    | 3   | 13  | 6    | 2   | 1    | 1   |
| 634 | E1628        | 68 | 2          | 3             | NLD     | 1981      | River water          | Environment            | E. faecium | Environment        | 0        | 0    | 0    | 0    | 0              | 68 | 9    | 12  | 12  | 24   | 1   | 1    | 5   |
| 635 | E1630        | 69 | 2          | 1             | NLD     | 1981      | River water          | Environment            | E. faecium | Environment        | 0        | 0    | 1    | 0    | 0              | 69 | 9    | 2   | 1   | 11   | 1   | 14   | 6   |
| 636 | E1631        | 69 | 2          | 1             | NLD     | 1981      | River water          | Environment            | E. faecium | Environment        | 0        | 0    | 1    | 0    | 0              | 69 | 9    | 2   | 1   | 11   | 1   | 14   | 6   |
| 637 | E1619        | 70 | 2          | 3             | NOR     | 1964      | Fish burger          | Animal_Food            | E. faecium | Food               | 0        | 0    | 0    | 0    | 0              | 70 | 9    | 4   | 12  | 9    | 1   | 7    | 10  |
| 638 | E1520        | 71 | 2          | 3             | ESP     | 1995      | Hospitalized patient | Clin_Isol              | E. faecium | Blood              | 0        | 0    |      |      |                | 71 | 15   | 3   | 1   | 2    | 1   | 1    | 1   |
| 639 | SEH1a/TX1361 | 71 | 2          | 3             | USA     | 1993-1994 | Hospitalized patient |                        |            |                    | 1        |      |      |      |                | 71 | 15   | 3   | 1   | 2    | 1   | 1    | 1   |
| 640 | E1611        | 72 | 3          | 3             | NOR     | 1956      | Cheese               | Animal_Food            | E. faecium | Food               | 0        | 0    |      |      |                | 72 | 3    | 1   | 1   | 2    | 13  | 1    | 1   |
| 641 | E1406        | 73 | 3          | 1             | GBR     | 2000      | Hospitalized patient | Clin_Isol              | E. faecium |                    | 0        | 0    |      |      |                | 73 | 20   | 9   | 16  | 3    | 1   | 25   | 1   |
| 642 | E1499        | 74 | 1          | 1             | ESP     | 1999      | Hospitalized patient | Clin_Isol              | E. faecium | Urine              | 0        | 0    | 1    | 0    | 0              | 74 | 22   | 13  | 14  | 22   | 6   | 27   | 6   |
| 643 | E1604        | 75 | 1          | 1             | NOR     | 1956      | Cheese               | Animal_Food            | E. faecium | Food               | 0        | 0    |      |      |                | 75 | 13   | 8   | 8   | 23   | 6   | 28   | 11  |
| 644 | E1607        | 76 | 1          | 1             | NOR     | 1956      | Cheese               | Animal_Food            | E. faecium | Food               | 0        | 0    | 1    | 1    | 0              | 76 | 13   | 8   | 10  | 23   | 6   | 28   | 11  |
| 645 | E1613        | 77 | 1          | 1             | NOR     | 1964      | Fish burger          | Animal_Food            | E. faecium | Food               | 0        | 0    |      |      |                | 77 | 13   | 8   | 10  | 23   | 6   | 29   | 11  |
| 646 | E1616        | 77 | 1          | 1             | NOR     | 1964      | Fish burger          | Animal_Food            | E. faecium | Food               | 0        | 0    |      |      |                | 77 | 13   | 8   | 10  | 23   | 6   | 29   | 11  |
| 647 | E1263        | 78 | 2          | 1             | AUT     | 2002      | Hospitalized patient | Clin_Isol              | E. faecium | Blood              | 1        | 1    | 1    | 1    | 0              | 78 | 15   | 1   | 1   | 1    | 1   | 1    | 1   |
| 648 | E1643        | 78 | 2          | 1             | DEU     | 2002      | Hospitalized patient | Hosp_Surv              | E. faecium | Faeces             | 1        | 1    | 1    | 1    | 1              | 78 | 15   | 1   | 1   | 1    | 1   | 1    | 1   |
| 649 | E1644        | 78 | 2          | 1             | DEU     | 2002      | Hospitalized patient | Hospital outbreak DE-1 | E. faecium | Catheter urine     | 1        | 1    | 1    | 1    | 1              | 78 | 15   | 1   | 1   | 1    | 1   | 1    | 1   |
| 650 | A0028        | 78 | 2          | 1             | ITA     | 2000      | Hospitalized patient | Hospital outbreak IT-2 | E. faecium |                    |          |      |      |      | 78             | 15 | 1    | 1   | 1   | 1    | 1   | 1    |     |
| 651 | A0029        | 78 | 2          | 1             | ITA     | 2000      | Hospitalized patient | Hospital outbreak IT-2 | E. faecium |                    |          |      |      |      | 78             | 15 | 1    | 1   | 1   | 1    | 1   | 1    |     |
| 652 | A0030        | 78 | 2          | 1             | ITA     | 2000      | Hospitalized patient | Hospital outbreak IT-2 | E. faecium |                    |          |      |      |      | 78             | 15 | 1    | 1   | 1   | 1    | 1   | 1    |     |
| 653 | A0031        | 78 | 2          | 1             | ITA     | 2000      | Hospitalized patient | Hospital outbreak IT-2 | E. faecium |                    |          |      |      |      | 78             | 15 | 1    | 1   | 1   | 1    | 1   | 1    |     |
| 654 | A0032        | 78 | 2          | 1             | ITA     | 2000      | Hospitalized patient | Hospital outbreak IT-2 | E. faecium |                    |          |      |      |      | 78             | 15 | 1    | 1   | 1   | 1    | 1   | 1    |     |
| 655 | A0070        | 78 | 2          | 1             | ITA     | 2001      | Hospitalized patient | Clin_Isol              | E. faecium | Blood              | 1        | 1    |      |      |                | 78 | 15   | 1   | 1   | 1    | 1   | 1    | 1   |
| 656 | A0071        | 78 | 2          | 1             | ITA     | 2001      | Hospitalized patient | Clin_Isol              | E. faecium | Blood              | 1        | 1    |      |      |                | 78 | 15   | 1   | 1   | 1    | 1   | 1    | 1   |
| 657 | A0073        | 78 | 2          | 1             | KOR     | 1998      | Hospitalized patient | Clin_Isol              | E. faecium | Sputum             | 1        |      |      |      |                | 78 | 15   | 1   | 1   | 1    | 1   | 1    | 1   |
| 658 | A0079        | 78 | 2          | 1             | KOR     | 1999      | Hospitalized patient | Clin_Isol              | E. faecium | Others             | 1        |      |      |      |                | 78 | 15   | 1   | 1   | 1    | 1   | 1    | 1   |
| 659 | A0083        | 78 | 2          | 1             | KOR     | 2001      | Hospitalized patient | Clin_Isol              | E. faecium | Others             | 1        |      |      |      |                | 78 | 15   | 1   | 1   | 1    | 1   | 1    | 1   |
| 660 | A0084        | 78 | 2          | 1             | KOR     | 2002      | Hospitalized patient | Clin_Isol              | E. faecium | Tissue             | 1        |      |      |      |                | 78 | 15   | 1   | 1   | 1    | 1   | 1    | 1   |
| 661 | A0085        | 78 | 2          | 1             | KOR     | 2002      | Hospitalized patient | Clin_Isol              | E. faecium | Urine, catheterize | 1        |      |      |      |                | 78 | 15   | 1   | 1   | 1    | 1   | 1    | 1   |
| 662 | A0087        | 78 | 2          | 1             | KOR     | 2002      | Hospitalized patient | Clin_Isol              | E. faecium | Urine, voided      | 1        |      |      |      |                | 78 | 15   | 1   | 1   | 1    | 1   | 1    | 1   |
| 663 | A0089        | 78 | 2          | 1             | KOR     | 2002      | Hospitalized patient | Clin_Isol              | E. faecium | Wound,surgical/Ti  | 1        |      |      |      |                | 78 | 15   | 1   | 1   | 1    | 1   | 1    | 1   |
| 664 | A0090        | 78 | 2          | 1             | KOR     | 2002      | Hospitalized patient | Clin_Isol              | E. faecium | Urine, voided      | 1        |      |      |      |                | 78 | 15   | 1   | 1   | 1    | 1   | 1    | 1   |
| 665 | A0091        | 78 | 2          | 1             | KOR     | 2002      | Hospitalized patient | Clin_Isol              | E. faecium | Urine, catheterize | 1        |      |      |      |                | 78 | 15   | 1   | 1   | 1    | 1   | 1    | 1   |
| 666 | A0097        | 78 | 2          | 1             | KOR     | 2002      | Hospitalized patient | Clin_Isol              | E. faecium | Blood,central line | 1        |      |      |      |                | 78 | 15   | 1   | 1   | 1    | 1   | 1    | 1   |
| 667 | A0098        | 78 | 2          | 1             | KOR     | 2002      | Hospitalized patient | Clin_Isol              | E. faecium | Others             | 1        |      |      |      |                | 78 | 15   | 1   | 1   | 1    | 1   | 1    | 1   |
| 668 | A0099        | 78 | 2          | 1             | KOR     | 2002      | Hospitalized patient | Clin_Isol              | E. faecium | Central line tip   | 1        |      |      |      |                | 78 | 15   | 1   | 1   | 1    | 1   | 1    | 1   |
| 669 | A0100        | 78 | 2          | 1             | KOR     | 2002      | Hospitalized patient | Hosp_Surv              | E. faecium | Rectal swab        | 1        |      |      |      |                | 78 | 15   | 1   | 1   | 1    | 1   | 1    | 1   |
| 670 | A0101        | 78 | 2          | 1             | KOR     | 2002      | Hospitalized patient | Clin_Isol              | E. faecium | Urine, voided      | 1        |      |      |      |                | 78 | 15   | 1   | 1   | 1    | 1   | 1    | 1   |
| 671 | A0105        | 78 | 2          | 1             | KOR     | 2002      | Hospitalized patient | Clin_Isol              | E. faecium | Fluid,other        | 1        |      |      |      |                | 78 | 15   | 1   | 1   | 1    | 1   | 1    | 1   |
| 672 | A0106        | 78 | 2          | 1             | KOR     | 2002      | Hospitalized patient | Clin_Isol              | E. faecium | Fluid,joint        | 1        |      |      |      |                | 78 | 15   | 1   | 1   | 1    | 1   | 1    | 1   |
| 673 | A0107        | 78 | 2          | 1             | KOR     | 2002      | Hospitalized patient | Clin_Isol              | E. faecium | Urine, voided      | 1        |      |      |      |                | 78 | 15   | 1   | 1   | 1    | 1   | 1    | 1   |
| 674 | A0108        | 78 | 2          | 1             | KOR     | 2002      | Hospitalized patient | Hosp_Surv              | E. faecium | Rectal swab        | 1        |      |      |      |                | 78 | 15   | 1   | 1   | 1    | 1   | 1    | 1   |
| 675 | A0109        | 78 | 2          | 1             | KOR     | 2002      | Hospitalized patient | Clin_Isol              | E. faecium | Others             | 1        |      |      |      |                | 78 | 15   | 1   | 1   | 1    | 1   | 1    | 1   |
| 676 | A0110        | 78 | 2          | 1             | KOR     | 2003      | Hospitalized patient | Clin_Isol              | E. faecium | Fluid ,peritoneal  | 1        |      |      |      |                | 78 | 15   | 1   | 1   | 1    | 1   | 1    | 1   |
| 677 | A0111        | 78 | 2          | 1             | KOR     | 2003      | Hospitalized patient | Clin_Isol              | E. faecium | Urine, catheterize | 1        |      |      |      |                | 78 | 15   | 1   | 1   | 1    | 1   | 1    | 1   |
| 678 | A0113        | 78 | 2          | 1             | KOR     | 2003      | Hospitalized patient | Hosp_Surv              | E. faecium | Rectal swab        | 1        |      |      |      |                | 78 | 15   | 1   | 1   | 1    | 1   | 1    | 1   |
| 679 | A0115        | 78 | 2          | 1             | KOR     | 2003      | Hospitalized patient | Clin_Isol              | E. faecium | Urine, voided      | 1        |      |      |      |                | 78 | 15   | 1   | 1   | 1    | 1   | 1    | 1   |
| 680 | A0116        | 78 | 2          | 1             | KOR     | 2003      | Hospitalized patient | Clin_Isol              | E. faecium | Others             | 1        |      |      |      |                | 78 | 15   | 1   | 1   | 1    | 1   | 1    | 1   |
| 681 | A0117        | 78 | 2          | 1             | KOR     | 2003      | Hospitalized patient | Clin_Isol              | E. faecium | Pus, open          | 1        |      |      |      |                | 78 | 15   | 1   | 1   | 1    | 1   | 1    | 1   |
| 682 | A0119        | 78 | 2          | 1             | KOR     | 2003      | Hospitalized patient | Clin_Isol              | E. faecium | Others             | 1        |      |      |      |                | 78 | 15   | 1   | 1   | 1    | 1   | 1    | 1   |
| 683 | A0120        | 78 | 2          | 1             | KOR     | 2003      | Hospitalized patient | Hosp_Surv              | E. faecium | Rectal swab        | 1        |      |      |      |                | 78 | 15   | 1   | 1   | 1    | 1   | 1    | 1   |
| 684 | A0121        | 78 | 2          | 1             | KOR     | 2003      | Hospitalized patient | Clin_Isol              | E. faecium | Blood,central line | 1        |      |      |      |                | 78 | 15   | 1   | 1   | 1    | 1   | 1    | 1   |
| 685 | A0123        | 78 | 2          | 1             | KOR     | 2003      | Hospitalized patient | Hosp_Surv              | E. faecium | Rectal swab        | 1        |      |      |      |                | 78 | 15   | 1   | 1   | 1    | 1   | 1    | 1   |
| 686 | A0124        | 78 | 2          | 1             | KOR     | 2003      | Hospitalized patient | Hosp_Surv              | E. faecium | Rectal swab        | 1        |      |      |      |                | 78 | 15   | 1   | 1   | 1    | 1   | 1    | 1   |
| 687 | A0125        | 78 | 2          | 1             | KOR     | 2003      | Hospitalized patient | Clin_Isol              | E. faecium | Pus, open          | 1        |      |      |      |                | 78 | 15   | 1   | 1   | 1    | 1   | 1    | 1   |
| 688 | A0126        | 78 | 2          | 1             | KOR     | 2003      | Hospitalized patient | Hosp_Surv              | E. faecium | Rectal swab        | 1        |      |      |      |                | 78 | 15   | 1   | 1   | 1    | 1   | 1    | 1   |
| 689 | A0127        | 78 | 2          | 1             | KOR     | 2003      | Hospitalized patient | Clin_Isol              | E. faecium | Urine, catheterize | 1        |      |      |      |                | 78 | 15   | 1   | 1   | 1    | 1   | 1    | 1   |
| 690 | A0128        | 78 | 2          | 1             | KOR     | 2003      | Hospitalized patient | Clin_Isol              | E. faecium | Urine, catheterize | 1        |      |      |      |                | 78 | 15   | 1   | 1   | 1    | 1   | 1    | 1   |
| 691 | A0129        | 78 | 2          | 1             | KOR     | 2003      | Hospitalized patient | Clin_Isol              | E. faecium | Urine, voided      | 1        |      |      |      |                | 78 | 15   | 1   | 1   | 1    | 1   | 1    | 1   |
| 692 | A0130        | 78 | 2          | 1             | KOR     | 2003      | Hospitalized patient | Clin_Isol              | E. faecium | Pus, closed        | 1        |      |      |      |                | 78 | 15   | 1   | 1   | 1    | 1   | 1    | 1   |
| 693 | A0131        | 78 | 2          | 1             | KOR     | 2003      | Hospitalized patient | Hosp_Surv              | E. faecium | Rectal swab        | 1        |      |      |      |                | 78 | 15   | 1   | 1   | 1    | 1   | 1    | 1   |

Supplementary Table 1. Meta-data of isolates included in this study

| No  | Strain code | ST | BAPS group | BAPS subgroup | country | year | Source               | Epidemiology | Species    | isol_site          | esp_gene | ampR | SgrA | EcbA | Genomic island | ST | AtpA | Ddl | Gdh | PurK | Gyd | PstS | Adk |
|-----|-------------|----|------------|---------------|---------|------|----------------------|--------------|------------|--------------------|----------|------|------|------|----------------|----|------|-----|-----|------|-----|------|-----|
| 694 | A0132       | 78 |            | 2             | 1 KOR   | 2003 | Hospitalized patient | Hosp_Surv    | E. faecium | Rectal swab        | 1        |      |      |      | 78             | 15 | 1    | 1   | 1   | 1    | 1   | 1    | 1   |
| 695 | A0133       | 78 |            | 2             | 1 KOR   | 2003 | Hospitalized patient | Clin_Isol    | E. faecium | Pus, open          | 1        |      |      |      | 78             | 15 | 1    | 1   | 1   | 1    | 1   | 1    | 1   |
| 696 | A0134       | 78 |            | 2             | 1 KOR   | 2003 | Hospitalized patient | Clin_Isol    | E. faecium | Blood,peripheral   | 1        |      |      |      | 78             | 15 | 1    | 1   | 1   | 1    | 1   | 1    | 1   |
| 697 | A0135       | 78 |            | 2             | 1 KOR   | 2003 | Hospitalized patient | Clin_Isol    | E. faecium | Pus, open          | 1        |      |      |      | 78             | 15 | 1    | 1   | 1   | 1    | 1   | 1    | 1   |
| 698 | A0136       | 78 |            | 2             | 1 KOR   | 2003 | Hospitalized patient | Clin_Isol    | E. faecium | Wound,surgical     | 1        |      |      |      | 78             | 15 | 1    | 1   | 1   | 1    | 1   | 1    | 1   |
| 699 | A0137       | 78 |            | 2             | 1 KOR   | 2003 | Hospitalized patient | Clin_Isol    | E. faecium | Wound,surgical     | 1        |      |      |      | 78             | 15 | 1    | 1   | 1   | 1    | 1   | 1    | 1   |
| 700 | A0139       | 78 |            | 2             | 1 KOR   | 2003 | Hospitalized patient | Hosp_Surv    | E. faecium | Rectal swab        | 1        |      |      |      | 78             | 15 | 1    | 1   | 1   | 1    | 1   | 1    | 1   |
| 701 | A0140       | 78 |            | 2             | 1 KOR   | 2003 | Hospitalized patient | Hosp_Surv    | E. faecium | Rectal swab        | 1        |      |      |      | 78             | 15 | 1    | 1   | 1   | 1    | 1   | 1    | 1   |
| 702 | A0143       | 78 |            | 2             | 1 KOR   | 2003 | Hospitalized patient | Hosp_Surv    | E. faecium | Rectal swab        | 1        |      |      |      | 78             | 15 | 1    | 1   | 1   | 1    | 1   | 1    | 1   |
| 703 | A0147       | 78 |            | 2             | 1 KOR   | 2003 | Hospitalized patient | Clin_Isol    | E. faecium | Urine, voided      | 1        |      |      |      | 78             | 15 | 1    | 1   | 1   | 1    | 1   | 1    | 1   |
| 704 | A0148       | 78 |            | 2             | 1 KOR   | 2003 | Hospitalized patient | Clin_Isol    | E. faecium | Blood,central line | 1        |      |      |      | 78             | 15 | 1    | 1   | 1   | 1    | 1   | 1    | 1   |
| 705 | A0149       | 78 |            | 2             | 1 KOR   | 2003 | Hospitalized patient | Clin_Isol    | E. faecium | Urine, Voided      | 1        |      |      |      | 78             | 15 | 1    | 1   | 1   | 1    | 1   | 1    | 1   |
| 706 | A0748       | 78 |            | 2             | 1 KOR   | 2004 | Hospitalized patient |              | E. faecium |                    | 1        | 1    |      |      | 78             | 15 | 1    | 1   | 1   | 1    | 1   | 1    | 1   |
| 707 | A0749       | 78 |            | 2             | 1 KOR   | 2004 | Hospitalized patient |              | E. faecium |                    | 1        | 1    |      |      | 78             | 15 | 1    | 1   | 1   | 1    | 1   | 1    | 1   |
| 708 | A0752       | 78 |            | 2             | 1 KOR   | 2004 | Hospitalized patient |              | E. faecium |                    | 1        | 1    |      |      | 78             | 15 | 1    | 1   | 1   | 1    | 1   | 1    | 1   |
| 709 | A0754       | 78 |            | 2             | 1 KOR   | 2004 | Hospitalized patient |              | E. faecium |                    | 1        | 1    |      |      | 78             | 15 | 1    | 1   | 1   | 1    | 1   | 1    | 1   |
| 710 | A0755       | 78 |            | 2             | 1 KOR   | 2004 | Hospitalized patient |              | E. faecium |                    | 1        | 1    |      |      | 78             | 15 | 1    | 1   | 1   | 1    | 1   | 1    | 1   |
| 711 | A0757       | 78 |            | 2             | 1 KOR   | 2004 | Hospitalized patient |              | E. faecium |                    | 1        | 1    |      |      | 78             | 15 | 1    | 1   | 1   | 1    | 1   | 1    | 1   |
| 712 | A0764       | 78 |            | 2             | 1 KOR   | 2004 | Hospitalized patient |              | E. faecium |                    | 1        | 0    |      |      | 78             | 15 | 1    | 1   | 1   | 1    | 1   | 1    | 1   |
| 713 | A0768       | 78 |            | 2             | 1 KOR   | 2004 | Hospitalized patient |              | E. faecium |                    | 1        | 1    |      |      | 78             | 15 | 1    | 1   | 1   | 1    | 1   | 1    | 1   |
| 714 | A0771       | 78 |            | 2             | 1 KOR   | 2004 | Hospitalized patient |              | E. faecium |                    | 1        | 1    |      |      | 78             | 15 | 1    | 1   | 1   | 1    | 1   | 1    | 1   |
| 715 | A0772       | 78 |            | 2             | 1 KOR   | 2004 | Hospitalized patient |              | E. faecium |                    | 0        | 1    |      |      | 78             | 15 | 1    | 1   | 1   | 1    | 1   | 1    | 1   |
| 716 | A0867       | 78 |            | 2             | 1 DEU   | 2004 | Hospitalized patient | Clin_Isol    | E. faecium | knee biopsy        | 1        | 1    |      |      | 78             | 15 | 1    | 1   | 1   | 1    | 1   | 1    | 1   |
| 717 | A1093       | 78 |            | 2             | 1 ITA   | 2004 | Hospitalized patient | Clin_isol    | E. faecium | Periepatic drainag | 1        | 1    |      |      | 78             | 15 | 1    | 1   | 1   | 1    | 1   | 1    | 1   |
| 718 | A1095       | 78 |            | 2             | 1 ITA   | 2004 | Hospitalized patient | Clin_isol    | E. faecium | erihepatic drainag | 0        | 1    |      |      | 78             | 15 | 1    | 1   | 1   | 1    | 1   | 1    | 1   |
| 719 | A1096       | 78 |            | 2             | 1 ITA   | 2004 | Hospitalized patient | Clin_isol    | E. faecium | Abdominal drainag  | 0        | 1    |      |      | 78             | 15 | 1    | 1   | 1   | 1    | 1   | 1    | 1   |
| 720 | A1097       | 78 |            | 2             | 1 ITA   | 2004 | Hospitalized patient | Hosp_surv    | E. faecium | Skin swab          | 1        | 1    |      |      | 78             | 15 | 1    | 1   | 1   | 1    | 1   | 1    | 1   |
| 721 | A1099       | 78 |            | 2             | 1 ITA   | 2004 | Hospitalized patient | Hosp_surv    | E. faecium | Skin swab          | 1        | 1    |      |      | 78             | 15 | 1    | 1   | 1   | 1    | 1   | 1    | 1   |
| 722 | A1100       | 78 |            | 2             | 1 ITA   | 2004 | Hospitalized patient | Clin_isol    | E. faecium | Blood              | 1        | 1    |      |      | 78             | 15 | 1    | 1   | 1   | 1    | 1   | 1    | 1   |
| 723 | A1103       | 78 |            | 2             | 1 ITA   | 2004 | Hospitalized patient | Hosp_surv    | E. faecium | Skin swab          | 1        | 1    |      |      | 78             | 15 | 1    | 1   | 1   | 1    | 1   | 1    | 1   |
| 724 | A1105       | 78 |            | 2             | 1 ITA   | 2004 | Hospitalized patient | Clin_isol    | E. faecium | Bile               | 1        | 1    |      |      | 78             | 15 | 1    | 1   | 1   | 1    | 1   | 1    | 1   |
| 725 | A1106       | 78 |            | 2             | 1 ITA   | 2004 | Hospitalized patient | Clin_isol    | E. faecium | Bile               | 1        | 1    |      |      | 78             | 15 | 1    | 1   | 1   | 1    | 1   | 1    | 1   |
| 726 | A1110       | 78 |            | 2             | 1 ITA   | 2005 | Hospitalized patient | Clin_isol    | E. faecium | Broncoaspirate     | 1        | 1    |      |      | 78             | 15 | 1    | 1   | 1   | 1    | 1   | 1    | 1   |
| 727 | A1111       | 78 |            | 2             | 1 ITA   | 2005 | Hospitalized patient | Clin_isol    | E. faecium | Blood              | 1        | 1    |      |      | 78             | 15 | 1    | 1   | 1   | 1    | 1   | 1    | 1   |
| 728 | A1112       | 78 |            | 2             | 1 ITA   | 2005 | Hospitalized patient | Clin_isol    | E. faecium | Urine              | 1        | 1    |      |      | 78             | 15 | 1    | 1   | 1   | 1    | 1   | 1    | 1   |
| 729 | A1114       | 78 |            | 2             | 1 ITA   | 2005 | Hospitalized patient | Clin_isol    | E. faecium | Urine              | 1        | 1    |      |      | 78             | 15 | 1    | 1   | 1   | 1    | 1   | 1    | 1   |
| 730 | A1116       | 78 |            | 2             | 1 ITA   | 2005 | Hospitalized patient | Clin_isol    | E. faecium | Abdominal drainag  | 1        | 1    |      |      | 78             | 15 | 1    | 1   | 1   | 1    | 1   | 1    | 1   |
| 731 | A1118       | 78 |            | 2             | 1 ITA   | 2005 | Hospitalized patient | Clin_isol    | E. faecium | Broncoalveolar lav | 1        | 1    |      |      | 78             | 15 | 1    | 1   | 1   | 1    | 1   | 1    | 1   |
| 732 | A1126       | 78 |            | 2             | 1 ITA   | 2005 | Hospitalized patient | Clin_isol    | E. faecium | Urine              | 1        | 1    |      |      | 78             | 15 | 1    | 1   | 1   | 1    | 1   | 1    | 1   |
| 733 | A1137       | 78 |            | 2             | 1 ITA   | 2005 | Hospitalized patient | Clin_isol    | E. faecium | Urine              | 1        | 1    |      |      | 78             | 15 | 1    | 1   | 1   | 1    | 1   | 1    | 1   |
| 734 | A1144       | 78 |            | 2             | 1 ITA   | 2005 | Hospitalized patient | Clin_isol    | E. faecium | Faringeal swab     | 0        | 1    |      |      | 78             | 15 | 1    | 1   | 1   | 1    | 1   | 1    | 1   |
| 735 | A1148       | 78 |            | 2             | 1 ITA   | 2005 | Hospitalized patient | Clin_isol    | E. faecium | Bile               | 0        | 1    |      |      | 78             | 15 | 1    | 1   | 1   | 1    | 1   | 1    | 1   |
| 736 | A1152       | 78 |            | 2             | 1 ITA   | 2005 | Hospitalized patient | Clin_isol    | E. faecium | Broncoaspirate     | 0        | 1    |      |      | 78             | 15 | 1    | 1   | 1   | 1    | 1   | 1    | 1   |
| 737 | A1153       | 78 |            | 2             | 1 ITA   | 2005 | Hospitalized patient | Clin_isol    | E. faecium | Urine              | 1        | 1    |      |      | 78             | 15 | 1    | 1   | 1   | 1    | 1   | 1    | 1   |
| 738 | A1154       | 78 |            | 2             | 1 ITA   | 2005 | Hospitalized patient | Clin_isol    | E. faecium | Urine              | 1        | 1    |      |      | 78             | 15 | 1    | 1   | 1   | 1    | 1   | 1    | 1   |
| 739 | A1155       | 78 |            | 2             | 1 ITA   | 2005 | Hospitalized patient | Clin_isol    | E. faecium | Broncoaspirate     | 0        | 1    |      |      | 78             | 15 | 1    | 1   | 1   | 1    | 1   | 1    | 1   |
| 740 | A1162       | 78 |            | 2             | 1 ITA   | 2005 | Hospitalized patient | Clin_isol    | E. faecium | Blood              | 1        | 1    |      |      | 78             | 15 | 1    | 1   | 1   | 1    | 1   | 1    | 1   |
| 741 | A1163       | 78 |            | 2             | 1 ITA   | 2005 | Hospitalized patient | Clin_isol    | E. faecium | Broncoaspirate     | 1        | 1    |      |      | 78             | 15 | 1    | 1   | 1   | 1    | 1   | 1    | 1   |
| 742 | A1377       | 78 |            | 2             | 1 CHN   | 2001 | Hospitalized patient | Clin_Isol    | E. faecium | Sputum             | 0        | 1    |      |      | 78             | 15 | 1    | 1   | 1   | 1    | 1   | 1    | 1   |
| 743 | A1378       | 78 |            | 2             | 1 CHN   | 2004 | Hospitalized patient | Clin_Isol    | E. faecium | Urine              | 0        | 1    |      |      | 78             | 15 | 1    | 1   | 1   | 1    | 1   | 1    | 1   |
| 744 | A1382       | 78 |            | 2             | 1 CHN   | 2005 | Hospitalized patient | Clin_Isol    | E. faecium | Blood              | 1        | 1    |      |      | 78             | 15 | 1    | 1   | 1   | 1    | 1   | 1    | 1   |
| 745 | A1386       | 78 |            | 2             | 1 CHN   | 2006 | Hospitalized patient | Clin_Isol    | E. faecium | Drain              | 1        | 1    |      |      | 78             | 15 | 1    | 1   | 1   | 1    | 1   | 1    | 1   |
| 746 | A1388       | 78 |            | 2             | 1 CHN   | 2007 | Hospitalized patient | Clin_Isol    | E. faecium | Drain              | 1        | 1    |      |      | 78             | 15 | 1    | 1   | 1   | 1    | 1   | 1    | 1   |
| 747 | A1392       | 78 |            | 2             | 1 CHN   | 2007 | Hospitalized patient | Clin_Isol    | E. faecium | Urine              | 1        | 0    |      |      | 78             | 15 | 1    | 1   | 1   | 1    | 1   | 1    | 1   |
| 748 | A1393       | 78 |            | 2             | 1 CHN   | 2007 | Hospitalized patient | Clin_Isol    | E. faecium | Drain              | 0        | 1    |      |      | 78             | 15 | 1    | 1   | 1   | 1    | 1   | 1    | 1   |
| 749 | A1394       | 78 |            | 2             | 1 CHN   | 2006 | Hospitalized patient | Clin_Isol    | E. faecium | Blood              | 1        | 1    |      |      | 78             | 15 | 1    | 1   | 1   | 1    | 1   | 1    | 1   |
| 750 | A1399       | 78 |            | 2             | 1 CHN   | 2007 | Hospitalized patient | Clin_Isol    | E. faecium | Blood              | 1        | 1    |      |      | 78             | 15 | 1    | 1   | 1   | 1    | 1   | 1    | 1   |
| 751 | A1401       | 78 |            | 2             | 1 CHN   | 2007 | Hospitalized patient | Clin_Isol    | E. faecium | Urine              | 1        | 1    |      |      | 78             | 15 | 1    | 1   | 1   | 1    | 1   | 1    | 1   |
| 752 | A1562       | 78 |            | 2             | 1 DEU   | 2006 | Hospitalized patient | Clin_Isol    | E. faecium | blood              | 1        | 1    |      |      | 78             | 15 | 1    | 1   | 1   | 1    | 1   | 1    | 1   |
| 753 | A1565       | 78 |            | 2             | 1 DEU   | 2006 | Hospitalized patient | Clin_Isol    | E. faecium | blood              | 1        | 1    |      |      | 78             | 15 | 1    | 1   | 1   | 1    | 1   | 1    | 1   |
| 754 | A1568       | 78 |            | 2             | 1 DEU   | 2006 | Hospitalized patient | Clin_Isol    | E. faecium | blood              | 1        | 1    |      |      | 78             | 15 | 1    | 1   | 1   | 1    | 1   | 1    | 1   |
| 755 | A1579       | 78 |            | 2             | 1 DEU   | 2006 | Hospitalized patient | Clin_Isol    | E. faecium | blood              | 1        | 1    |      |      | 78             | 15 | 1    | 1   | 1   | 1    | 1   | 1    | 1   |
| 756 | A1593       | 78 |            | 2             | 1 DEU   | 2006 | Hospitalized patient | Clin_Isol    | E. faecium | blood              | 1        | 1    |      |      | 78             | 15 | 1    | 1   | 1   | 1    | 1   | 1    | 1   |

Supplementary Table 1. Meta-data of isolates included in this study

| No  | Strain code | ST | BAPS group | BAPS subgroup | country | year | Source                  | Epidemiology | Species    | Isol_site | esp_gene | ampR | SgrA | EcbA | Genomic island | ST | AtpA | Ddl | Gdh | PurK | Gyd | PstS | Adk |
|-----|-------------|----|------------|---------------|---------|------|-------------------------|--------------|------------|-----------|----------|------|------|------|----------------|----|------|-----|-----|------|-----|------|-----|
| 757 | A1616       | 78 | 2          |               | 1 CHN   | 2006 | Hospitalized patient    |              | E. faecium |           |          |      |      |      | 78             | 15 | 1    | 1   | 1   | 1    | 1   | 1    | 1   |
| 758 | A1617       | 78 | 2          |               | 1 CHN   | 2006 | Hospitalized patient    |              | E. faecium |           |          |      |      |      | 78             | 15 | 1    | 1   | 1   | 1    | 1   | 1    | 1   |
| 759 | A1619       | 78 | 2          |               | 1 CHN   | 2006 | Hospitalized patient    |              | E. faecium |           |          |      |      |      | 78             | 15 | 1    | 1   | 1   | 1    | 1   | 1    | 1   |
| 760 | A1620       | 78 | 2          |               | 1 CHN   | 2006 | Hospitalized patient    |              | E. faecium |           |          |      |      |      | 78             | 15 | 1    | 1   | 1   | 1    | 1   | 1    | 1   |
| 761 | A1624       | 78 | 2          |               | 1 CHN   | 2007 | Hospitalized patient    |              | E. faecium |           |          |      |      |      | 78             | 15 | 1    | 1   | 1   | 1    | 1   | 1    | 1   |
| 762 | A1732       | 78 | 2          |               | 1 JPN   | 2007 | Hospitalized patient    | Clin_Isol    | E. faecium | Urine     |          |      |      |      | 78             | 15 | 1    | 1   | 1   | 1    | 1   | 1    | 1   |
| 763 | A1735       | 78 | 2          |               | 1 JPN   | 2006 | Hospitalized patient    | Clin_Isol    | E. faecium | Wound     |          |      |      |      | 78             | 15 | 1    | 1   | 1   | 1    | 1   | 1    | 1   |
| 764 | A1823       | 78 | 2          |               | 1 SWE   |      | Hospitalized patient    | Clin_Isol    | E. faecium | Blood     |          |      |      |      | 78             | 15 | 1    | 1   | 1   | 1    | 1   | 1    | 1   |
| 765 | E1181       | 78 | 2          |               | 1 AUT   |      | Hospitalized patient    | Clin_Isol    | E. faecium | Blood     |          |      |      |      | 78             | 15 | 1    | 1   | 1   | 1    | 1   | 1    | 1   |
| 766 | E1186       | 78 | 2          |               | 1 DEU   |      | Hospitalized patient    | Clin_Isol    | E. faecium | Blood     | 1        | 1    |      |      | 78             | 15 | 1    | 1   | 1   | 1    | 1   | 1    | 1   |
| 767 | E1267       | 78 | 2          |               | 1 AUT   |      | Hospitalized patient    | Clin_Isol    | E. faecium | Blood     | 1        | 1    |      |      | 78             | 15 | 1    | 1   | 1   | 1    | 1   | 1    | 1   |
| 768 | E1277       | 78 | 2          |               | 1 DEU   |      | Hospitalized patient    | Clin_Isol    | E. faecium | Blood     | 1        | 1    |      |      | 78             | 15 | 1    | 1   | 1   | 1    | 1   | 1    | 1   |
| 769 | E1321       | 78 | 2          |               | 1 ITA   | 1999 | Hospitalized patient    | Clin_Isol    | E. faecium | Catheter  | 1        | 1    |      |      | 78             | 15 | 1    | 1   | 1   | 1    | 1   | 1    | 1   |
| 770 | E1324       | 78 | 2          |               | 1 ITA   | 1999 | Hospitalized patient    | Clin_Isol    | E. faecium | Blood     | 1        | 1    |      |      | 78             | 15 | 1    | 1   | 1   | 1    | 1   | 1    | 1   |
| 771 | E1325       | 78 | 2          |               | 1 ITA   | 1999 | Hospitalized patient    | Clin_Isol    | E. faecium | Blood     | 1        | 1    |      |      | 78             | 15 | 1    | 1   | 1   | 1    | 1   | 1    | 1   |
| 772 | E2368       | 78 | 2          |               | 1 HUN   | 2005 | Hospitalized patient    | Clin_Isol    | E. faecium | Blood     |          |      |      |      | 78             | 15 | 1    | 1   | 1   | 1    | 1   | 1    | 1   |
| 773 | E2369       | 78 | 2          |               | 1 HUN   | 2005 | Hospitalized patient    | Clin_Isol    | E. faecium | Wound     |          |      |      |      | 78             | 15 | 1    | 1   | 1   | 1    | 1   | 1    | 1   |
| 774 | E2375       | 78 | 2          |               | 1 NLD   | 2005 | Hospitalized patient    |              | E. faecium |           |          | 1    |      |      | 78             | 15 | 1    | 1   | 1   | 1    | 1   | 1    | 1   |
| 775 | E2397       | 78 | 2          |               | 1 NLD   | 2006 | Hospitalized patient    |              | E. faecium |           |          | 1    |      |      | 78             | 15 | 1    | 1   | 1   | 1    | 1   | 1    | 1   |
| 776 | E2454       | 78 | 2          |               | 1 NLD   |      | Hospitalized patient    | Clin_Isol    | E. faecium | Blood     | 1        |      |      |      | 78             | 15 | 1    | 1   | 1   | 1    | 1   | 1    | 1   |
| 777 | E2479       | 78 | 2          |               | 1 NLD   |      | Hospitalized patient    |              | E. faecium |           | 1        |      |      |      | 78             | 15 | 1    | 1   | 1   | 1    | 1   | 1    | 1   |
| 778 | E2560       | 78 | 2          |               | 1 NLD   | 2006 | Hospitalized patient    | Clin_Isol    | E. faecium | Blood     | 1        | 1    |      |      | 78             | 15 | 1    | 1   | 1   | 1    | 1   | 1    | 1   |
| 779 | E2603       | 78 | 2          |               | 1 NLD   | 2005 | Hospitalized patient    | Clin_Isol    | E. faecium | Blood     | 1        | 1    |      |      | 78             | 15 | 1    | 1   | 1   | 1    | 1   | 1    | 1   |
| 780 | E2618       | 78 | 2          |               | 1 NLD   | 2005 | Hospitalized patient    | Clin_Isol    | E. faecium | Blood     | 1        | 1    |      |      | 78             | 15 | 1    | 1   | 1   | 1    | 1   | 1    | 1   |
| 781 | E2632       | 78 | 2          |               | 1 NLD   | 2006 | Hospitalized patient    | Clin_Isol    | E. faecium | Blood     | 1        | 1    |      |      | 78             | 15 | 1    | 1   | 1   | 1    | 1   | 1    | 1   |
| 782 | E3169       | 78 | 2          |               | 1 NLD   | 2005 | Hospitalized patient    | Clin_Isol    | E. faecium | Blood     | 1        | 1    |      |      | 78             | 15 | 1    | 1   | 1   | 1    | 1   | 1    | 1   |
| 783 | E3180       | 78 | 2          |               | 1 NLD   | 2006 | Hospitalized patient    | Clin_Isol    | E. faecium | Blood     | 1        | 1    |      |      | 78             | 15 | 1    | 1   | 1   | 1    | 1   | 1    | 1   |
| 784 | E3582       | 78 | 2          |               | 1 NLD   | 2006 | Hospitalized patient    | Clin_Isol    | E. faecium | Blood     | 1        | 1    |      |      | 78             | 15 | 1    | 1   | 1   | 1    | 1   | 1    | 1   |
| 785 | E4076       | 78 | 2          |               | 1 NLD   | 2006 | Hospitalized patient    | Clin_Isol    | E. faecium | Blood     | 1        | 1    |      |      | 78             | 15 | 1    | 1   | 1   | 1    | 1   | 1    | 1   |
| 786 | E4389       | 78 | 2          |               | 1 DNK   |      | Dog                     | Animal_Dog   | E. faecium | Faeces    | 0        | 1    |      |      | 78             | 15 | 1    | 1   | 1   | 1    | 1   | 1    | 1   |
| 787 | E4392       | 78 | 2          |               | 1 DNK   |      | Dog                     | Animal_Dog   | E. faecium | Faeces    | 0        | 1    |      |      | 78             | 15 | 1    | 1   | 1   | 1    | 1   | 1    | 1   |
| 788 | E4395       | 78 | 2          |               | 1 DNK   |      | Dog                     | Animal_Dog   | E. faecium | Faeces    | 0        | 1    |      |      | 78             | 15 | 1    | 1   | 1   | 1    | 1   | 1    | 1   |
| 789 | E4396       | 78 | 2          |               | 1 DNK   |      | Dog                     | Animal_Dog   | E. faecium | Faeces    | 0        | 1    |      |      | 78             | 15 | 1    | 1   | 1   | 1    | 1   | 1    | 1   |
| 790 | E4397       | 78 | 2          |               | 1 DNK   |      | Non-hospitalized person | Comm_Surv    | E. faecium | Faeces    | 0        | 1    |      |      | 78             | 15 | 1    | 1   | 1   | 1    | 1   | 1    | 1   |
| 791 | E4398       | 78 | 2          |               | 1 DNK   |      | Dog                     | Animal_Dog   | E. faecium | Faeces    | 0        | 1    |      |      | 78             | 15 | 1    | 1   | 1   | 1    | 1   | 1    | 1   |
| 792 | E4400       | 78 | 2          |               | 1 DNK   |      | Dog                     | Animal_Dog   | E. faecium | Faeces    | 0        | 1    |      |      | 78             | 15 | 1    | 1   | 1   | 1    | 1   | 1    | 1   |
| 793 | E4401       | 78 | 2          |               | 1 DNK   |      | Dog                     | Animal_Dog   | E. faecium | Faeces    | 0        | 1    |      |      | 78             | 15 | 1    | 1   | 1   | 1    | 1   | 1    | 1   |
| 794 | E4402       | 78 | 2          |               | 1 DNK   |      | Dog                     | Animal_Dog   | E. faecium | Faeces    | 0        | 1    |      |      | 78             | 15 | 1    | 1   | 1   | 1    | 1   | 1    | 1   |
| 795 | E4403       | 78 | 2          |               | 1 DNK   |      | Dog                     | Animal_Dog   | E. faecium | Faeces    | 0        | 1    |      |      | 78             | 15 | 1    | 1   | 1   | 1    | 1   | 1    | 1   |
| 796 | E4407       | 78 | 2          |               | 1 DNK   |      | Dog                     | Animal_Dog   | E. faecium | Faeces    | 0        | 1    |      |      | 78             | 15 | 1    | 1   | 1   | 1    | 1   | 1    | 1   |
| 797 | E4408       | 78 | 2          |               | 1 GBR   |      | Dog                     | Animal_Dog   | E. faecium | Faeces    | 0        | 1    |      |      | 78             | 15 | 1    | 1   | 1   | 1    | 1   | 1    | 1   |
| 798 | E4409       | 78 | 2          |               | 1 GBR   |      | Dog                     | Animal_Dog   | E. faecium | Faeces    | 0        | 1    |      |      | 78             | 15 | 1    | 1   | 1   | 1    | 1   | 1    | 1   |
| 799 | E4422       | 78 | 2          |               | 1 GBR   |      | Dog                     | Animal_Dog   | E. faecium | Faeces    | 0        | 1    |      |      | 78             | 15 | 1    | 1   | 1   | 1    | 1   | 1    | 1   |
| 800 | E4424       | 78 | 2          |               | 1 GBR   |      | Dog                     | Animal_Dog   | E. faecium | Faeces    | 0        | 1    |      |      | 78             | 15 | 1    | 1   | 1   | 1    | 1   | 1    | 1   |
| 801 | E4434       | 78 | 2          |               | 1 GBR   |      | Dog                     | Animal_Dog   | E. faecium | Faeces    | 0        | 1    |      |      | 78             | 15 | 1    | 1   | 1   | 1    | 1   | 1    | 1   |
| 802 | E4437       | 78 | 2          |               | 1 GBR   |      | Dog                     | Animal_Dog   | E. faecium | Faeces    | 0        | 1    |      |      | 78             | 15 | 1    | 1   | 1   | 1    | 1   | 1    | 1   |
| 803 | E4589       | 78 | 2          |               | 1 NLD   |      | Cat                     | Animal_Cat   | E. faecium | Faeces    | 1        | 1    |      |      | 78             | 15 | 1    | 1   | 1   | 1    | 1   | 1    | 1   |
| 804 | U0262       | 78 | 2          |               | 1 NLD   | 2004 | Hospitalized patient    | Clin_Isol    | E. faecium | Blood     | 1        | 1    |      |      | 78             | 15 | 1    | 1   | 1   | 1    | 1   | 1    | 1   |
| 805 | U0317       | 78 | 2          |               | 1 NLD   | 2005 | Hospitalized patient    | Clin_Isol    | E. faecium | Urine     | 1        | 1    |      |      | 78             | 15 | 1    | 1   | 1   | 1    | 1   | 1    | 1   |
| 806 | U0367       | 78 | 2          |               | 1 NLD   | 2005 | Hospitalized patient    | Clin_Isol    | E. faecium | Blood     | 1        | 1    |      |      | 78             | 15 | 1    | 1   | 1   | 1    | 1   | 1    | 1   |
| 807 | U0443       | 78 | 2          |               | 1 NLD   | 2005 | Hospitalized patient    | Hosp_Surv    | E. faecium | Faeces    | 1        | 1    |      |      | 78             | 15 | 1    | 1   | 1   | 1    | 1   | 1    | 1   |
| 808 | U0495       | 78 | 2          |               | 1 NLD   | 2005 | Hospitalized patient    | Hosp_Surv    | E. faecium | Faeces    | 1        | 1    |      |      | 78             | 15 | 1    | 1   | 1   | 1    | 1   | 1    | 1   |
| 809 | U0496       | 78 | 2          |               | 1 NLD   | 2005 | Hospitalized patient    | Hosp_Surv    | E. faecium | Faeces    | 1        | 1    |      |      | 78             | 15 | 1    | 1   | 1   | 1    | 1   | 1    | 1   |
| 810 | U0565       | 78 | 2          |               | 1 NLD   | 2005 | Hospitalized patient    | Hosp_Surv    | E. faecium | Faeces    | 1        | 1    |      |      | 78             | 15 | 1    | 1   | 1   | 1    | 1   | 1    | 1   |
| 811 | U0573       | 78 | 2          |               | 1 NLD   | 2005 | Hospitalized patient    | Hosp_Surv    | E. faecium | Faeces    | 1        | 1    |      |      | 78             | 15 | 1    | 1   | 1   | 1    | 1   | 1    | 1   |
| 812 | U0590       | 78 | 2          |               | 1 NLD   | 2006 | Hospitalized patient    | Hosp_Surv    | E. faecium | Faeces    | 1        | 1    |      |      | 78             | 15 | 1    | 1   | 1   | 1    | 1   | 1    | 1   |
| 813 | U0603       | 78 | 2          |               | 1 NLD   | 2006 | Hospitalized patient    | Hosp_Surv    | E. faecium | Faeces    | 1        | 1    |      |      | 78             | 15 | 1    | 1   | 1   | 1    | 1   | 1    | 1   |
| 814 | U0625       | 78 | 2          |               | 1 NLD   | 2006 | Hospitalized patient    | Hosp_Surv    | E. faecium | Faeces    | 1        | 1    |      |      | 78             | 15 | 1    | 1   | 1   | 1    | 1   | 1    | 1   |
| 815 | U0631       | 78 | 2          |               | 1 NLD   | 2006 | Hospitalized patient    | Hosp_Surv    | E. faecium | Faeces    | 1        | 1    |      |      | 78             | 15 | 1    | 1   | 1   | 1    | 1   | 1    | 1   |
| 816 | E0322       | 79 | 2          |               | 3 FRA   | 1997 | Hospitalized patient    | Hosp_Surv    | E. faecium | Faeces    | 0        | 0    | 0    | 0    | 0              | 79 | 9    | 3   | 1   | 6    | 1   | 7    | 1   |
| 817 | A1492       | 79 | 2          |               | 3 DEU   | 1991 | Hospitalized patient    | Clin_Isol    | E. faecium | blood     | 0        | 0    |      |      | 79             | 9  | 3    | 1   | 6   | 1    | 7   | 1    | 1   |
| 818 | E0323       | 79 | 2          |               | 3 FRA   | 1997 | Hospitalized patient    | Hosp_surv    | E. faecium | Faeces    | 0        | 0    | 0    | 0    | 0              | 79 | 9    | 3   | 1   | 6    | 1   | 7    | 1   |
| 819 | E0333       | 80 | 2          |               | 1 ISR   | 1997 | Hospitalized patient    | Clin_Isol    | E. faecium | Blood     | 0        | 1    | 1    | 0    | 1              | 80 | 9    | 1   | 1   | 1    | 12  | 1    | 1   |

Supplementary Table 1. Meta-data of isolates included in this study

| No  | Strain code  | ST  | BAPS group | BAPS subgroup | country | year    | Source                  | Epidemiology            | Species    | Isol_site        | esp_gene | ampR | SgrA | EcbA | Genomic island | ST  | AtpA | Ddl | Gdh | PurK | Gyd | PstS | Adk |
|-----|--------------|-----|------------|---------------|---------|---------|-------------------------|-------------------------|------------|------------------|----------|------|------|------|----------------|-----|------|-----|-----|------|-----|------|-----|
| 820 | A0183        | 80  | 2          |               | 1 KOR   |         |                         |                         | E. faecium |                  |          |      |      |      | 80             | 9   | 1    | 1   | 1   | 12   | 1   | 1    |     |
| 821 | A1130        | 80  | 2          |               | 1 ITA   | 2005    | Hospitalized patient    | Hosp_surv               | E. faecium | Skin swab        | 1        | 1    |      |      | 80             | 9   | 1    | 1   | 1   | 12   | 1   | 1    |     |
| 822 | A1145        | 80  | 2          |               | 1 ITA   | 2005    | Hospitalized patient    | Clin_isol               | E. faecium | Abdominal draina | 1        | 1    |      |      | 80             | 9   | 1    | 1   | 1   | 12   | 1   | 1    |     |
| 823 | A1164        | 80  | 2          |               | 1 ITA   | 2005    | Hospitalized patient    | Clin_isol               | E. faecium | Abdominal draina | 1        | 1    |      |      | 80             | 9   | 1    | 1   | 1   | 12   | 1   | 1    |     |
| 824 | A1514        | 80  | 2          |               | 1 DEU   | 1999    | Hospitalized patient    | Clin_Isol               | E. faecium | blood            | 0        | 1    |      |      | 80             | 9   | 1    | 1   | 1   | 12   | 1   | 1    |     |
| 825 | A1531        | 80  | 2          |               | 1 DEU   | 2000    | Hospitalized patient    | Clin_Isol               | E. faecium | blood            | 0        | 1    |      |      | 80             | 9   | 1    | 1   | 1   | 12   | 1   | 1    |     |
| 826 | A1820        | 80  | 2          |               | 1 SWE   |         | Hospitalized patient    | Clin_Isol               | E. faecium | Blood            |          |      |      |      | 80             | 9   | 1    | 1   | 1   | 12   | 1   | 1    |     |
| 827 | A1831        | 80  | 2          |               | 1 SWE   |         | Hospitalized patient    | Clin_Isol               | E. faecium | Blood            |          |      |      |      | 80             | 9   | 1    | 1   | 1   | 12   | 1   | 1    |     |
| 828 | E0705        | 80  | 2          |               | 1 GBR   |         | Hospitalized patient    | Clin_Isol               | E. faecium |                  | 0        | 1    |      |      | 80             | 9   | 1    | 1   | 1   | 12   | 1   | 1    |     |
| 829 | E1992        | 80  | 2          |               | 1 DEU   | 2001    | Hospitalized patient    |                         | E. faecium | blood            |          |      |      |      | 80             | 9   | 1    | 1   | 1   | 12   | 1   | 1    |     |
| 830 | E2365        | 80  | 2          |               | 1 HUN   | 2004    | Hospitalized patient    | Hospital outbreak HUN-1 | E. faecium | Blood            |          |      |      |      | 80             | 9   | 1    | 1   | 1   | 12   | 1   | 1    |     |
| 831 | E2366        | 80  | 2          |               | 1 HUN   | 2004    | Hospitalized patient    | Hospital outbreak HUN-1 | E. faecium | Urine            |          |      |      |      | 80             | 9   | 1    | 1   | 1   | 12   | 1   | 1    |     |
| 832 | A1522        | 81  | 3          |               | 3 DEU   | 1999    | Hospitalized patient    | Clin_Isol               | E. faecium | blood            | 1        | 1    |      |      | 81             | 7   | 1    | 1   | 5   | 5    | 1   | 1    |     |
| 833 | A1523        | 81  | 3          |               | 3 DEU   | 1999    | Hospitalized patient    | Clin_Isol               | E. faecium | blood            | 1        | 1    |      |      | 81             | 7   | 1    | 1   | 5   | 5    | 1   | 1    |     |
| 834 | A1524        | 81  | 3          |               | 3 DEU   | 1999    | Hospitalized patient    | Clin_Isol               | E. faecium | blood            | 1        | 1    |      |      | 81             | 7   | 1    | 1   | 5   | 5    | 1   | 1    |     |
| 835 | A1600        | 81  | 3          |               | 3 DEU   | 2006    | Hospitalized patient    | Clin_Isol               | E. faecium | blood            | 0        | 1    |      |      | 81             | 7   | 1    | 1   | 5   | 5    | 1   | 1    |     |
| 836 | E0338        | 81  | 3          |               | 3 ITA   | 1997    | Hospitalized patient    | Clin_Isol               | E. faecium | Skin             | 0        | 1    |      |      | 81             | 7   | 1    | 1   | 5   | 5    | 1   | 1    |     |
| 837 | E4144        | 81  | 3          |               | 3 GBR   | 1993    | Hospitalized patient    | Clin_Isol               | E. faecium | Blood            | 1        | 1    |      |      | 81             | 7   | 1    | 1   | 5   | 5    | 1   | 1    |     |
| 838 | A0060        | 82  | 2          |               | 1 BEL   |         | Poultry                 | Animal_Poultry          | E. faecium |                  |          |      |      |      | 82             | 9   | 2    | 6   | 3   | 1    | 7   | 1    |     |
| 839 | A1742        | 82  | 2          |               | 1 USA   | 2005    |                         |                         | E. faecium |                  |          |      |      |      | 82             | 9   | 2    | 6   | 3   | 1    | 7   | 1    |     |
| 840 | A2205        | 82  | 2          |               | 1       |         | Poultry                 | Animal_Poultry          | E. faecium | Faeces           |          |      |      |      | 82             | 9   | 2    | 6   | 3   | 1    | 7   | 1    |     |
| 841 | E0127        | 82  | 2          |               | 1 NLD   | 1997    | Hospitalized patient    | Clin_Isol               | E. faecium | Ascites          | 0        | 0    |      |      | 82             | 9   | 2    | 6   | 3   | 1    | 7   | 1    |     |
| 842 | E0128        | 82  | 2          |               | 1 NLD   | 1996    | Non-hospitalized person | Comm_Surv               | E. faecium | Faeces           | 0        | 0    | 0    | 0    | 0              | 82  | 9    | 2   | 6   | 3    | 1   | 7    | 1   |
| 843 | E0341        | 82  | 2          |               | 1 GBR   | 1997    | Hospitalized patient    | Clin_Isol               | E. faecium |                  | 0        | 0    |      |      | 82             | 9   | 2    | 6   | 3   | 1    | 7   | 1    |     |
| 844 | E1394        | 83  | 2          |               | 3 GBR   | 2000    | Hospitalized patient    | Clin_Isol               | E. faecium |                  | 0        | 0    |      |      | 83             | 9   | 12   | 1   | 3   | 7    | 23  | 5    |     |
| 845 | E1403        | 84  | 3          |               | 1 GBR   | 2000    | Hospitalized patient    | Clin_Isol               | E. faecium |                  | 0        | 0    | 1    | 0    | 0              | 84  | 12   | 3   | 1   | 19   | 1   | 24   | 1   |
| 846 | E1262        | 85  | 1          |               | ESP     |         | Hospitalized patient    | Clin_Isol               | E. faecium | Blood            | 0        | 0    |      |      | 85             | 13  | 8    | 15  | 8   | 11   | 10  | 6    |     |
| 847 | E1503        | 85  | 1          |               | ESP     | 1995    | Hospitalized patient    | Clin_Isol               | E. faecium | Blood            | 0        | 0    |      |      | 85             | 13  | 8    | 15  | 8   | 11   | 10  | 6    |     |
| 848 | E1621        | 86  | 3          |               | 1 NLD   | 1959    | Hospitalized patient    | Clin_Isol               | E. faecium | Blood            | 0        | 0    | 1    | 0    | 0              | 86  | 12   | 15  | 1   | 3    | 1   | 30   | 12  |
| 849 | E0075        | 87  | 3          |               | 3 NLD   | 1995    | Hospitalized patient    | Hosp_Surv               | E. faecium | Faeces           | 0        | 0    | 0    | 0    | 0              | 87  | 3    | 5   | 1   | 6    | 1   | 1    | 1   |
| 850 | E0124        | 88  | 2          |               | 3 NLD   | 1996    | Hospitalized patient    | Clin_Isol               | E. faecium | Urine            | 0        | 0    |      |      | 88             | 18  | 3    | 1   | 9   | 1    | 1   | 5    |     |
| 851 | E0492        | 89  | 2          |               | 3 NLD   | 1999    | Hospitalized patient    | Hosp_Surv               | E. faecium |                  | 0        | 0    | 0    | 0    | 0              | 89  | 18   | 3   | 1   | 12   | 15  | 1    | 5   |
| 852 | E0167        | 90  | 3          |               | 3 NLD   | 1996    | Poultry                 | Animal_Poultry          | E. faecium | Faeces           | 0        | 0    |      |      | 90             | 3   | 2    | 13  | 6   | 1    | 1   | 1    |     |
| 853 | E0318        | 91  | 2          |               | 4 USA   | 1994    | Hospitalized patient    | Clin_Isol               | E. faecium | Peritoneal fluid | 0        | 1    | 1    | 0    | 0              | 91  | 5    | 3   | 1   | 1    | 8   | 6    | 1   |
| 854 | A1832        | 92  | 2          |               | 3 SWE   |         | Hospitalized patient    | Clin_Isol               | E. faecium | Blood            |          |      |      |      | 92             | 5   | 3    | 1   | 2   | 1    | 1   | 1    |     |
| 855 | E1050        | 92  | 2          |               | 3 NLD   | 1998    | Non-hospitalized person | Comm_Surv               | E. faecium | Faeces           | 0        | 0    | 0    | 0    | 0              | 92  | 5    | 3   | 1   | 2    | 1   | 1    | 1   |
| 856 | E1626        | 92  | 2          |               | 3 NLD   | 1965    | Hospitalized patient    | Clin_Isol               | E. faecium | Peritoneal fluid | 0        | 1    |      |      | 92             | 5   | 3    | 1   | 2   | 1    | 1   | 1    |     |
| 857 | RLA-4/TX2061 | 92  | 2          |               | 3 USA   | 1981-87 | Hospitalized patient    |                         |            |                  | 1        |      |      |      | 92             | 5   | 3    | 1   | 2   | 1    | 1   | 1    |     |
| 858 | RLA-5/TX2062 | 92  | 2          |               | 3 USA   | 1981-87 | Hospitalized patient    |                         |            |                  | 1        |      |      |      | 92             | 5   | 3    | 1   | 2   | 1    | 1   | 1    |     |
| 859 | RLA-7/TX2064 | 92  | 2          |               | 3 USA   | 1981-87 | Hospitalized patient    |                         |            |                  | 1        |      |      |      | 92             | 5   | 3    | 1   | 2   | 1    | 1   | 1    |     |
| 860 | E1629        | 93  | 2          |               | 3 NLD   | 1981    | River water             | Environment             | E. faecium | Environment      | 0        | 0    | 0    | 0    | 0              | 93  | 5    | 3   | 1   | 2    | 1   | 31   | 1   |
| 861 | E1423        | 94  | 1          |               | GBR     | 2000    | Hospitalized patient    | Clin_Isol               | E. faecium |                  | 0        | 0    | 1    | 0    | 0              | 94  | 13   | 8   | 8   | 8    | 6   | 10   | 6   |
| 862 | E0980        | 94  | 1          |               | 1 NLD   | 1998    | Non-hospitalized person | Comm_Surv               | E. faecium | Faeces           | 0        | 0    | 1    | 0    | 0              | 94  | 13   | 8   | 8   | 8    | 6   | 10   | 6   |
| 863 | E0986        | 94  | 1          |               | 1 NLD   | 1998    | Non-hospitalized person | Comm_Surv               | E. faecium | Faeces           | 0        | 0    |      |      | 94             | 13  | 8    | 8   | 8   | 6    | 10  | 6    |     |
| 864 | E1669        | 94  | 1          |               | BRA     |         | Hospitalized patient    | Hosp_surv               | E. faecium | Faeces           | 0        | 0    | 1    | 0    | 0              | 94  | 13   | 8   | 8   | 8    | 6   | 10   | 6   |
| 865 | E1670        | 94  | 1          |               | BRA     |         | Hospitalized patient    | Hosp_surv               | E. faecium | Faeces           | 0        | 0    | 1    | 0    | 0              | 94  | 13   | 8   | 8   | 8    | 6   | 10   | 6   |
| 866 | E1974        | 94  | 1          |               | 1 DEU   | 2001    | Hospitalized patient    |                         | E. faecium | Pleura           |          |      |      |      | 94             | 13  | 8    | 8   | 8   | 6    | 10  | 6    |     |
| 867 | E1012        | 95  | 1          |               | 1 NLD   | 1998    | Non-hospitalized person | Comm_Surv               | E. faecium | Faeces           | 0        | 0    |      |      | 95             | 11  | 13   | 9   | 15  | 10   | 19  | 6    |     |
| 868 | E1031        | 96  | 1          |               | 1 NLD   | 1998    | Non-hospitalized person | Comm_Surv               | E. faecium | Faeces           | 0        | 0    |      |      | 96             | 13  | 16   | 8   | 16  | 11   | 19  | 6    |     |
| 869 | A1496        | 97  | 3          |               | 2 DEU   | 1995    | Hospitalized patient    | Clin_Isol               | E. faecium | blood            | 0        | 1    |      |      | 97             | 4   | 5    | 1   | 3   | 1    | 20  | 1    |     |
| 870 | E1037        | 97  | 3          |               | 2 NLD   | 1998    | Non-hospitalized person | Comm_Surv               | E. faecium | Faeces           | 0        | 0    | 0    | 0    | 0              | 97  | 4    | 5   | 1   | 3    | 1   | 20   | 1   |
| 871 | E1695        | 97  | 3          |               | 2 BRA   | 1998    | Hospitalized patient    | Hosp_Surv               | E. faecium | Faeces           | 0        | 0    | 0    | 0    | 0              | 97  | 4    | 5   | 1   | 3    | 1   | 20   | 1   |
| 872 | E1046        | 98  | 1          |               | 1 NLD   | 1998    | Non-hospitalized person | Comm_Surv               | E. faecium | Faeces           | 0        | 0    | 1    | 0    | 0              | 98  | 19   | 13  | 9   | 17   | 10  | 9    | 6   |
| 873 | E1172        | 99  | 2          |               | 1 POL   |         | Hospitalized patient    | Clin_Isol               | E. faecium | Urine            | 1        | 1    | 1    | 1    | 1              | 99  | 9    | 5   | 1   | 18   | 1   | 21   | 3   |
| 874 | E1421        | 100 | 1          |               | 1 GBR   | 2000    | Hospitalized patient    | Clin_Isol               | E. faecium |                  | 0        | 0    | 1    | 0    | 0              | 100 | 5    | 13  | 18  | 17   | 10  | 26   | 6   |
| 875 | E2548        | 100 | 1          |               | 1 NLD   | 2005    | Hospitalized patient    | Clin_Isol               | E. faecium | Blood            | 0        | 0    |      |      | 100            | 5   | 13   | 18  | 17  | 10   | 26  | 6    |     |
| 876 | E1485        | 101 | 2          |               | 1 ESP   | 2000    | Non-hospitalized person | Comm_Surv               | E. faecium | Faeces           | 0        | 0    | 0    | 0    | 0              | 101 | 21   | 2   | 12  | 9    | 1   | 20   | 5   |
| 877 | E1489        | 102 | 3          |               | 3 ESP   | 2000    | Non-hospitalized person | Comm_Surv               | E. faecium | Faeces           | 0        | 0    | 0    | 0    | 0              | 102 | 2    | 4   | 1   | 9    | 1   | 1    | 10  |
| 878 | E1493        | 103 | 3          |               | 3 ESP   | 2001    | Hospitalized patient    | Hosp_Surv               | E. faecium | Faeces           | 1        | 1    | 1    | 1    | 1              | 103 | 1    | 14  | 1   | 21   | 1   | 1    | 1   |
| 879 | E1736        | 103 | 3          |               | 3 ESP   | 2001    | Hospitalized patient    | Clin_Isol               | E. faecium | Blood            | 1        | 1    |      |      | 103            | 1   | 14   | 1   | 21  | 1    | 1   | 1    |     |
| 880 | E1622        | 104 | 3          |               | 1 NLD   | 1959    | Mouse                   | Animal_Rodent           | E. faecium | Faeces           | 0        | 0    | 0    | 0    | 0              | 104 | 3    | 3   | 17  | 2    | 1   | 1    | 1   |
| 881 | A1594        | 104 | 3          |               | 1 DEU   | 2006    | Hospitalized patient    | Clin_Isol               | E. faecium | blood            | 0        | 0    |      |      | 104            | 3   | 3    | 17  | 2   | 1    | 1   | 1    |     |
| 882 | E1635        | 105 | 4          |               | 1 NLD   |         | Test strain             | Laboratory              | E. faecium |                  | 0        | 0    |      |      | 105            | 4   | 4    | 19  | 25  | 14   | 7   | 5    |     |

Supplementary Table 1. Meta-data of isolates included in this study

| No  | Strain code     | ST  | BAPS group | BAPS subgroup | country | year | Source                  | Epidemiology           | Species    | Isol_site      | esp_gene | ampR | SgrA | EcbA | Genomic island | ST  | AtpA | Ddl | Gdh | PurK | Gyd | PstS | Adk |
|-----|-----------------|-----|------------|---------------|---------|------|-------------------------|------------------------|------------|----------------|----------|------|------|------|----------------|-----|------|-----|-----|------|-----|------|-----|
| 883 | E1636           | 106 | 3          | 1             | NLD     | 1961 | Hospitalized patient    | Clin_Isol              | E. faecium | Blood          | 0        | 0    | 0    | 1    | 0              | 106 | 23   | 3   | 1   | 6    | 1   | 1    | 1   |
| 884 | E1671           | 107 | 1          |               | BRA     |      | Hospitalized patient    | Hosp_surv              | E. faecium | Faeces         | 0        | 0    |      |      |                | 107 | 11   | 13  | 18  | 17   | 10  | 19   | 6   |
| 885 | E1672           | 108 | 1          |               | BRA     |      | Hospitalized patient    | Hosp_surv              | E. faecium | Faeces         | 0        | 0    |      |      |                | 108 | 25   | 13  | 18  | 17   | 17  | 19   | 6   |
| 886 | E1673           | 109 | 3          | 1             | BRA     |      | Hospitalized patient    | Hosp_surv              | E. faecium | Faeces         | 0        | 1    |      |      |                | 109 | 3    | 3   | 6   | 6    | 1   | 1    | 1   |
| 887 | E1674           | 110 | 2          | 3             | BRA     |      | Hospitalized patient    | Hosp_surv              | E. faecium | Faeces         | 0        | 0    | 0    | 0    | 0              | 110 | 5    | 4   | 20  | 9    | 2   | 1    | 5   |
| 888 | E1675           | 111 | 3          | 1             | BRA     |      | Hospitalized patient    | Hosp_surv              | E. faecium | Faeces         | 0        | 1    | 0    | 0    | 0              | 111 | 2    | 3   | 6   | 2    | 1   | 1    | 1   |
| 889 | E1676           | 112 | 2          | 3             | BRA     |      | Hospitalized patient    | Hosp_surv              | E. faecium | Faeces         | 0        | 1    |      |      |                | 112 | 9    | 3   | 21  | 18   | 6   | 1    | 3   |
| 890 | NEDH-87-P1/TX20 | 112 | 2          | 3             | USA     | 1986 | Hospitalized patient    |                        |            |                |          |      |      |      | 112            | 9   | 3    | 21  | 18  | 6    | 1   | 3    |     |
| 891 | E1677           | 113 | 2          | 3             | BRA     |      | Hospitalized patient    | Hosp_surv              | E. faecium | Faeces         | 0        | 0    | 0    | 0    | 0              | 113 | 26   | 3   | 1   | 2    | 1   | 1    | 1   |
| 892 | E1679           | 114 | 2          | 3             | BRA     | 1998 | Hospitalized patient    | Hospital outbreak BR-1 | E. faecium | Catheter       | 1        | 0    | 0    | 1    | 1              | 114 | 5    | 3   | 21  | 18   | 6   | 32   | 3   |
| 893 | E1680           | 114 | 2          | 3             | BRA     | 1998 | Hospitalized patient    | Hospital outbreak BR-1 | E. faecium | Faeces         | 1        | 0    |      |      |                | 114 | 5    | 3   | 21  | 18   | 6   | 32   | 3   |
| 894 | E1681           | 114 | 2          | 3             | BRA     | 1998 | Hospitalized patient    | Hospital outbreak BR-1 | E. faecium | Faeces         | 0        | 0    |      |      |                | 114 | 5    | 3   | 21  | 18   | 6   | 32   | 3   |
| 895 | E1682           | 114 | 2          | 3             | BRA     | 1998 | Hospitalized patient    | Hospital outbreak BR-1 | E. faecium | Faeces         | 1        | 0    |      |      |                | 114 | 5    | 3   | 21  | 18   | 6   | 32   | 3   |
| 896 | E1683           | 114 | 2          | 3             | BRA     | 1998 | Hospitalized patient    | Hospital outbreak BR-1 | E. faecium | Tracheal secr. | 0        | 0    |      |      |                | 114 | 5    | 3   | 21  | 18   | 6   | 32   | 3   |
| 897 | E1684           | 114 | 2          | 3             | BRA     | 1998 | Hospitalized patient    | Hospital outbreak BR-1 | E. faecium | Faeces         | 0        | 0    |      |      |                | 114 | 5    | 3   | 21  | 18   | 6   | 32   | 3   |
| 898 | E1686           | 114 | 2          | 3             | BRA     | 1998 | Hospitalized patient    | Hospital outbreak BR-1 | E. faecium | Faeces         | 0        | 1    |      |      |                | 114 | 5    | 3   | 21  | 18   | 6   | 32   | 3   |
| 899 | E1687           | 114 | 2          | 3             | BRA     | 1998 | Hospitalized patient    | Hospital outbreak BR-1 | E. faecium | Faeces         | 0        | 1    |      |      |                | 114 | 5    | 3   | 21  | 18   | 6   | 32   | 3   |
| 900 | E1688           | 114 | 2          | 3             | BRA     | 1998 | Hospitalized patient    | Hospital outbreak BR-1 | E. faecium | Blood          | 1        | 1    |      |      |                | 114 | 5    | 3   | 21  | 18   | 6   | 32   | 3   |
| 901 | E1689           | 114 | 2          | 3             | BRA     | 1998 | Hospitalized patient    | Hospital outbreak BR-1 | E. faecium | Faeces         | 1        | 1    |      |      |                | 114 | 5    | 3   | 21  | 18   | 6   | 32   | 3   |
| 902 | E1690           | 114 | 2          | 3             | BRA     | 1998 | Hospitalized patient    | Hospital outbreak BR-1 | E. faecium | Faeces         | 1        | 0    |      |      |                | 114 | 5    | 3   | 21  | 18   | 6   | 32   | 3   |
| 903 | E1691           | 114 | 2          | 3             | BRA     | 1998 | Hospitalized patient    | Hospital outbreak BR-1 | E. faecium | Urine          | 1        | 1    |      |      |                | 114 | 5    | 3   | 21  | 18   | 6   | 32   | 3   |
| 904 | E1692           | 114 | 2          | 3             | BRA     | 1998 | Hospitalized patient    | Hospital outbreak BR-1 | E. faecium | Faeces         | 1        | 1    |      |      |                | 114 | 5    | 3   | 21  | 18   | 6   | 32   | 3   |
| 905 | E1693           | 114 | 2          | 3             | BRA     | 1998 | Hospitalized patient    | Hospital outbreak BR-1 | E. faecium | Faeces         | 1        | 0    |      |      |                | 114 | 5    | 3   | 21  | 18   | 6   | 32   | 3   |
| 906 | E1694           | 114 | 2          | 3             | BRA     | 1998 | Hospitalized patient    | Hospital outbreak BR-1 | E. faecium | Faeces         | 1        | 0    |      |      |                | 114 | 5    | 3   | 21  | 18   | 6   | 32   | 3   |
| 907 | E1698           | 114 | 2          | 3             | BRA     | 1998 | Hospitalized patient    | Hospital outbreak BR-1 | E. faecium | Faeces         | 0        | 1    |      |      |                | 114 | 5    | 3   | 21  | 18   | 6   | 32   | 3   |
| 908 | E1696           | 115 | 2          | 1             | BRA     | 1997 | Hospitalized patient    | Clin_Isol              | E. faecium | nd             | 0        | 0    |      |      |                | 115 | 9    | 5   | 1   | 2    | 1   | 1    | 1   |
| 909 | E1668           | 116 | 1          |               | BRA     |      | Hospitalized patient    | Hosp_surv              | E. faecium | Faeces         | 0        | 0    |      |      |                | 116 | 25   | 17  | 18  | 17   | 10  | 19   | 6   |
| 910 | E1133           | 117 | 2          | 1             | USA     | 2001 | Hospitalized patient    | Hosp_Surv              | E. faecium | Faeces         | 1        | 1    | 1    | 1    | 1              | 117 | 9    | 1   | 1   | 1    | 1   | 1    | 1   |
| 911 | A0103           | 117 | 2          | 1             | KOR     | 2002 | Hospitalized patient    | Clin_Isol              | E. faecium | Pus, closed    | 1        | 1    |      |      |                | 117 | 9    | 1   | 1   | 1    | 1   | 1    | 1   |
| 912 | A0868           | 117 | 2          | 1             | DEU     | 1996 | Hospitalized patient    | Clin_Isol              | E. faecium | wound          | 1        | 1    |      |      |                | 117 | 9    | 1   | 1   | 1    | 1   | 1    | 1   |
| 913 | A1035           | 117 | 2          | 1             | DEU     | 1996 | Hospitalized patient    | Clin_Isol              | E. faecium | wound          | 1        | 1    |      |      |                | 117 | 9    | 1   | 1   | 1    | 1   | 1    | 1   |
| 914 | A1036           | 117 | 2          | 1             | DEU     | 1996 | Hospitalized patient    |                        | E. faecium |                |          |      |      |      | 117            | 9   | 1    | 1   | 1   | 1    | 1   | 1    | 1   |
| 915 | A1037           | 117 | 2          | 1             | DEU     | 1997 | Hospitalized patient    |                        | E. faecium |                |          |      |      |      | 117            | 9   | 1    | 1   | 1   | 1    | 1   | 1    | 1   |
| 916 | A1038           | 117 | 2          | 1             | DEU     | 1998 | Hospitalized patient    |                        | E. faecium |                |          |      |      |      | 117            | 9   | 1    | 1   | 1   | 1    | 1   | 1    | 1   |
| 917 | A1039           | 117 | 2          | 1             | DEU     | 1998 | Hospitalized patient    |                        | E. faecium |                |          |      |      |      | 117            | 9   | 1    | 1   | 1   | 1    | 1   | 1    | 1   |
| 918 | A1040           | 117 | 2          | 1             | DEU     | 1998 | Hospitalized patient    |                        | E. faecium |                |          |      |      |      | 117            | 9   | 1    | 1   | 1   | 1    | 1   | 1    | 1   |
| 919 | A1041           | 117 | 2          | 1             | DEU     | 1998 | Hospitalized patient    |                        | E. faecium |                |          |      |      |      | 117            | 9   | 1    | 1   | 1   | 1    | 1   | 1    | 1   |
| 920 | A1508           | 117 | 2          | 1             | DEU     | 1998 | Hospitalized patient    | Clin_Isol              | E. faecium | blood          | 0        | 1    |      |      |                | 117 | 9    | 1   | 1   | 1    | 1   | 1    | 1   |
| 921 | A1510           | 117 | 2          | 1             | DEU     | 1998 | Hospitalized patient    | Clin_Isol              | E. faecium | blood          | 0        | 1    |      |      |                | 117 | 9    | 1   | 1   | 1    | 1   | 1    | 1   |
| 922 | A1511           | 117 | 2          | 1             | DEU     | 1999 | Hospitalized patient    | Clin_Isol              | E. faecium | blood          | 0        | 1    |      |      |                | 117 | 9    | 1   | 1   | 1    | 1   | 1    | 1   |
| 923 | A1512           | 117 | 2          | 1             | DEU     | 1999 | Hospitalized patient    | Clin_Isol              | E. faecium | blood          | 0        | 1    |      |      |                | 117 | 9    | 1   | 1   | 1    | 1   | 1    | 1   |
| 924 | A1513           | 117 | 2          | 1             | DEU     | 1999 | Hospitalized patient    | Clin_Isol              | E. faecium | blood          | 0        | 1    |      |      |                | 117 | 9    | 1   | 1   | 1    | 1   | 1    | 1   |
| 925 | A1516           | 117 | 2          | 1             | DEU     | 1999 | Hospitalized patient    | Clin_Isol              | E. faecium | blood          | 0        | 1    |      |      |                | 117 | 9    | 1   | 1   | 1    | 1   | 1    | 1   |
| 926 | A1529           | 117 | 2          | 1             | DEU     | 2000 | Hospitalized patient    | Clin_Isol              | E. faecium | blood          | 0        | 1    |      |      |                | 117 | 9    | 1   | 1   | 1    | 1   | 1    | 1   |
| 927 | A1534           | 117 | 2          | 1             | DEU     | 2001 | Hospitalized patient    | Clin_Isol              | E. faecium | blood          | 0        | 1    |      |      |                | 117 | 9    | 1   | 1   | 1    | 1   | 1    | 1   |
| 928 | A1589           | 117 | 2          | 1             | DEU     | 2006 | Hospitalized patient    | Clin_Isol              | E. faecium | blood          | 0        | 1    |      |      |                | 117 | 9    | 1   | 1   | 1    | 1   | 1    | 1   |
| 929 | A1613           | 117 | 2          | 1             | DEU     | 2007 | Hospitalized patient    | Clin_Isol              | E. faecium | blood          | 1        | 1    |      |      |                | 117 | 9    | 1   | 1   | 1    | 1   | 1    | 1   |
| 930 | A1614           | 117 | 2          | 1             | DEU     | 2007 | Hospitalized patient    | Clin_Isol              | E. faecium | blood          | 1        | 1    |      |      |                | 117 | 9    | 1   | 1   | 1    | 1   | 1    | 1   |
| 931 | A1623           | 117 | 2          | 1             | CHN     | 2006 | Hospitalized patient    |                        | E. faecium |                |          |      |      |      | 117            | 9   | 1    | 1   | 1   | 1    | 1   | 1    | 1   |
| 932 | E1279           | 117 | 2          | 1             | DEU     |      | Hospitalized patient    | Clin_Isol              | E. faecium | Blood          | 1        | 1    |      |      |                | 117 | 9    | 1   | 1   | 1    | 1   | 1    | 1   |
| 933 | E2011           | 117 | 2          | 1             | DEU     | 2000 | Hospitalized patient    |                        | E. faecium | Katheter       |          |      |      |      |                | 117 | 9    | 1   | 1   | 1    | 1   | 1    | 1   |
| 934 | E2168           | 117 | 2          | 1             | USA     | 2001 | Environment             | Environment_Hospital   | E. faecium | B/P cuff       | 1        |      |      |      |                | 117 | 9    | 1   | 1   | 1    | 1   | 1    | 1   |
| 935 | E2297           | 117 | 2          | 1             | USA     | 2001 | Hospitalized patient    | Clin_Isol              | E. faecium | Urine          | 1        |      |      |      |                | 117 | 9    | 1   | 1   | 1    | 1   | 1    | 1   |
| 936 | E2633           | 117 | 2          | 1             | NLD     | 2006 | Hospitalized patient    | Clin_Isol              | E. faecium | Blood          | 1        | 1    |      |      |                | 117 | 9    | 1   | 1   | 1    | 1   | 1    | 1   |
| 937 | E3160           | 117 | 2          | 1             | NLD     | 2005 | Hospitalized patient    | Clin_Isol              | E. faecium | Blood          | 1        | 1    |      |      |                | 117 | 9    | 1   | 1   | 1    | 1   | 1    | 1   |
| 938 | E3449           | 117 | 2          | 1             | NLD     | 2006 | Hospitalized patient    | Clin_Isol              | E. faecium | Blood          | 1        | 1    |      |      |                | 117 | 9    | 1   | 1   | 1    | 1   | 1    | 1   |
| 939 | E4084           | 117 | 2          | 1             | NLD     | 2006 | Hospitalized patient    | Clin_Isol              | E. faecium | Blood          | 1        | 1    |      |      |                | 117 | 9    | 1   | 1   | 1    | 1   | 1    | 1   |
| 940 | E1327           | 118 | 1          |               | NLD     | 1998 | Non-hospitalized person | Comm_Surv              | E. faecium | Faeces         | 0        | 0    | 1    | 0    | 0              | 118 | 24   | 13  | 8   | 8    | 2   | 22   | 6   |
| 941 | A0026           | 119 | 3          | 3             | ITA     |      | Meat                    | Animal_Food            | E. faecium | Food           |          |      |      |      |                | 119 | 2    | 18  | 13  | 6    | 1   | 1    | 1   |
| 942 | A0027           | 120 | 2          | 4             | ITA     | 1997 | Poultry                 | Animal_Poultry         | E. faecium | Faeces         |          |      |      |      |                | 120 | 9    | 2   | 1   | 6    | 1   | 33   | 1   |
| 943 | A0033           | 121 | 2          | 1             | ITA     |      | Animal                  | Animal                 | E. faecium |                |          |      |      |      |                | 121 | 15   | 1   | 1   | 2    | 1   | 1    | 1   |
| 944 | E1775           | 121 | 2          | 1             | BEL     | 2001 | Pig                     | Animal_pig             | E. faecium | Faeces         | 0        | 0    |      |      |                | 121 | 15   | 1   | 1   | 2    | 1   | 1    | 1   |
| 945 | E4399           | 121 | 2          | 1             | DNK     |      | Dog                     | Animal_Dog             | E. faecium | Faeces         | 0        | 1    |      |      |                | 121 | 15   | 1   | 1   | 2    | 1   | 1    | 1   |

Supplementary Table 1. Meta-data of isolates included in this study

| No   | Strain code | ST  | BAPS group | BAPS subgroup | country | year | Source                  | Epidemiology         | Species    | Isol_site        | esp_gene | ampR | SgrA | EcbA | Genomic island | ST  | AtpA | Ddl | Gdh | PurK | Gyd | PstS | Adk |   |
|------|-------------|-----|------------|---------------|---------|------|-------------------------|----------------------|------------|------------------|----------|------|------|------|----------------|-----|------|-----|-----|------|-----|------|-----|---|
| 946  | A0034       | 122 | 3          | 3             | ITA     |      | Animal                  | Animal               | E. faecium |                  |          |      |      |      | 122            | 14  | 2    | 1   | 3   | 1    | 1   | 1    | 1   |   |
| 947  | E1141       | 123 | 2          | 1             | NLD     | 1995 | Hospitalized patient    | Hosp_Surv            | E. faecium | Faeces           | 0        | 0    | 0    | 1    | 0              | 123 | 5    | 5   | 1   | 3    | 1   | 1    | 1   |   |
| 948  | E1318       | 123 | 2          | 1             | NLD     | 1998 | Hospitalized patient    | Clin_Isol            | E. faecium |                  | 0        | 0    |      |      | 123            | 5   | 5    | 1   | 3   | 1    | 1   | 1    | 1   |   |
| 949  | E1882       | 123 | 2          | 1             | NLD     | 1994 | Pig                     | Animal_pig           | E. faecium |                  |          |      |      |      | 123            | 5   | 5    | 1   | 3   | 1    | 1   | 1    | 1   |   |
| 950  | A0061       | 124 | 2          | 1             | BEL     |      | Poultry                 | Animal_Poultry       | E. faecium |                  |          |      |      |      | 124            | 9   | 2    | 7   | 6   | 1    | 1   | 1    | 1   |   |
| 951  | E1169       | 124 | 2          | 1             | ITA     |      | Hospitalized patient    | Clin_Isol            | E. faecium | Wound            | 0        | 0    |      |      | 124            | 9   | 2    | 7   | 6   | 1    | 1   | 1    | 1   |   |
| 952  | E1173       | 125 | 3          | 1             | PRT     |      | Hospitalized patient    | Clin_Isol            | E. faecium | Wound            | 0        | 1    |      |      | 125            | 7   | 3    | 1   | 1   | 5    | 1   | 1    | 1   |   |
| 953  | E1722       | 125 | 3          | 1             | TZA     |      | Hospitalized patient    | Clin_Isol            | E. faecium | Blood            | 0        | 1    |      |      | 125            | 7   | 3    | 1   | 1   | 5    | 1   | 1    | 1   |   |
| 954  | E1182       | 126 | 2          | 3             | BEL     |      | Hospitalized patient    | Clin_Isol            | E. faecium | Blood            | 0        | 0    |      |      | 126            | 9   | 10   | 1   | 11  | 1    | 14  | 13   | 1   |   |
| 955  | E1258       | 127 | 3          | 5             | ESP     |      | Hospitalized patient    | Clin_Isol            | E. faecium | Blood            | 0        | 0    |      |      | 127            | 2   | 2    | 6   | 6   | 1    | 11  | 1    | 1   |   |
| 956  | E1260       | 128 | 3          | 1             | ESP     |      | Hospitalized patient    | Clin_Isol            | E. faecium | Blood            | 0        | 0    |      |      | 128            | 3   | 3    | 1   | 14  | 1    | 1   | 1    | 1   |   |
| 957  | E4458       | 128 | 3          | 1             | NLD     | 2008 | Dog                     | Animal_Dog           | E. faecium | Faeces           |          | 1    |      |      | 128            | 3   | 3    | 1   | 14  | 1    | 1   | 1    | 1   |   |
| 958  | E1271       | 129 | 2          | 3             | FRA     |      | Hospitalized patient    | Clin_Isol            | E. faecium | Blood            | 0        | 0    |      |      | 129            | 18  | 3    | 1   | 2   | 1    | 1   | 13   | 1   |   |
| 959  | E1283       | 130 | 2          | 3             | DEU     |      | Hospitalized patient    | Clin_Isol            | E. faecium | Blood            | 0        | 0    |      |      | 130            | 8   | 4    | 12  | 9   | 1    | 1   | 5    | 1   |   |
| 960  | E1286       | 131 | 3          | 3             | DEU     |      | Hospitalized patient    | Clin_Isol            | E. faecium | Blood            | 0        | 0    |      |      | 131            | 2   | 18   | 12  | 3   | 1    | 1   | 1    | 1   |   |
| 961  | E1307       | 132 | 3          | 3             | PRT     |      | Hospitalized patient    | Clin_Isol            | E. faecium | Blood            | 0        | 1    | 1    | 0    | 1              | 132 | 7    | 1   | 1   | 1    | 12  | 1    | 1   | 1 |
| 962  | E1728       | 132 | 3          | 3             | TZA     |      | Hospitalized patient    | Clin_Isol            | E. faecium | Blood            | 0        | 1    | 1    | 1    | 1              | 132 | 7    | 1   | 1   | 1    | 12  | 1    | 1   | 1 |
| 963  | E1304       | 132 | 3          | 3             | PRT     |      | Hospitalized patient    | Clin_Isol            | E. faecium | Blood            | 0        | 1    |      |      | 132            | 7   | 1    | 1   | 1   | 12   | 1   | 1    | 1   |   |
| 964  | E1310       | 132 | 3          | 3             | PRT     |      | Hospitalized patient    | Clin_Isol            | E. faecium | Blood            | 0        | 1    |      |      | 132            | 7   | 1    | 1   | 1   | 12   | 1   | 1    | 1   |   |
| 965  | E1725       | 132 | 3          | 3             | TZA     |      | Hospitalized patient    | Clin_Isol            | E. faecium | Blood            | 0        | 1    |      |      | 132            | 7   | 1    | 1   | 1   | 12   | 1   | 1    | 1   |   |
| 966  | E1726       | 132 | 3          | 3             | TZA     |      | Hospitalized patient    | Clin_Isol            | E. faecium | Blood            | 0        | 1    |      |      | 132            | 7   | 1    | 1   | 1   | 12   | 1   | 1    | 1   |   |
| 967  | E1729       | 132 | 3          | 3             | TZA     |      | Hospitalized patient    | Clin_Isol            | E. faecium | Blood            | 0        | 1    |      |      | 132            | 7   | 1    | 1   | 1   | 12   | 1   | 1    | 1   |   |
| 968  | E1730       | 132 | 3          | 3             | TZA     |      | Hospitalized patient    | Clin_Isol            | E. faecium | Blood            | 0        | 1    |      |      | 132            | 7   | 1    | 1   | 1   | 12   | 1   | 1    | 1   |   |
| 969  | A2187       | 133 | 2          | 1             |         |      | Pig                     | Animal_Pig           | E. faecium | Faeces           |          |      |      |      | 133            | 5   | 2    | 1   | 9   | 1    | 14  | 5    | 1   |   |
| 970  | A2196       | 133 | 2          | 1             |         |      | Pig                     | Animal_Pig           | E. faecium | Faeces           |          |      |      |      | 133            | 5   | 2    | 1   | 9   | 1    | 14  | 5    | 1   |   |
| 971  | E0677       | 133 | 2          | 1             | NLD     |      | Pig                     | Animal_Pig           | E. faecium | Faeces           | 0        | 0    |      |      | 133            | 5   | 2    | 1   | 9   | 1    | 14  | 5    | 1   |   |
| 972  | E0681       | 133 | 2          | 1             | DEU     |      | Pig                     | Animal_Pig           | E. faecium | Faeces           | 0        | 0    |      |      | 133            | 5   | 2    | 1   | 9   | 1    | 14  | 5    | 1   |   |
| 973  | E0689       | 133 | 2          | 1             | ESP     |      | Pig                     | Animal_Pig           | E. faecium | Faeces           | 0        | 0    |      |      | 133            | 5   | 2    | 1   | 9   | 1    | 14  | 5    | 1   |   |
| 974  | E1337       | 133 | 2          | 1             | NLD     | 2001 | Hospitalized patient    | Clin_Isol            | E. faecium | Faeces           | 0        | 0    |      |      | 133            | 5   | 2    | 1   | 9   | 1    | 14  | 5    | 1   |   |
| 975  | E1537       | 133 | 2          | 1             | NLD     | 2002 | Hospitalized patient    | Hosp_Surv            | E. faecium | Faeces           | 0        | 0    |      |      | 133            | 5   | 2    | 1   | 9   | 1    | 14  | 5    | 1   |   |
| 976  | E1372       | 134 | 2          | 1             | NLD     | 2001 | Hospitalized patient    | Clin_Isol            | E. faecium | Pus              | 0        | 1    |      |      | 134            | 5   | 2    | 1   | 3   | 1    | 7   | 1    | 1   |   |
| 977  | E1276       | 135 | 2          | 3             | DEU     |      | Hospitalized patient    | Clin_Isol            | E. faecium | Blood            | 0        | 0    |      |      | 135            | 27  | 3    | 1   | 2   | 1    | 1   | 1    | 1   |   |
| 978  | E1766       | 136 | 3          | 1             | BEL     | 1996 | Non-hospitalized person | Comm_Surv            | E. faecium | Faeces           | 0        | 0    | 0    | 0    | 0              | 136 | 2    | 3   | 1   | 26   | 1   | 1    | 1   | 1 |
| 979  | E1769       | 136 | 3          | 1             | BEL     | 1996 | Hospitalized patient    | Hosp_Surv            | E. faecium | Faeces           | 0        | 0    |      |      | 136            | 2   | 3    | 1   | 26  | 1    | 1   | 1    | 1   |   |
| 980  | E0685       | 137 | 2          | 3             | ESP     |      | Pig                     | Animal_Pig           | E. faecium | Faeces           | 0        | 0    |      |      | 137            | 5   | 3    | 1   | 9   | 1    | 1   | 5    | 1   |   |
| 981  | E0686       | 137 | 2          | 3             | ESP     |      | Pig                     | Animal_Pig           | E. faecium | Faeces           | 0        | 0    |      |      | 137            | 5   | 3    | 1   | 9   | 1    | 1   | 5    | 1   |   |
| 982  | E1768       | 137 | 2          | 3             | BEL     | 1996 | Non-hospitalized person | Comm_Surv            | E. faecium | Faeces           | 0        | 0    | 0    | 0    | 0              | 137 | 5    | 3   | 1   | 9    | 1   | 1    | 5   | 1 |
| 983  | E1772       | 138 | 3          | 3             | BEL     | 2001 | Pig                     | Animal_pig           | E. faecium | Faeces           | 0        | 0    |      |      | 138            | 3   | 5    | 1   | 3   | 1    | 14  | 5    | 1   |   |
| 984  | E1777       | 139 | 3          | 3             | BEL     | 2001 | Pig                     | Animal_pig           | E. faecium | Faeces           | 0        | 0    |      |      | 139            | 3   | 5    | 1   | 3   | 1    | 1   | 5    | 1   |   |
| 985  | E1779       | 140 | 3          | 3             | BEL     | 2001 | Pig                     | Animal_pig           | E. faecium | carcasses        | 0        | 0    |      |      | 140            | 3   | 2    | 1   | 9   | 1    | 1   | 5    | 1   |   |
| 986  | E1781       | 141 | 2          | 1             | BEL     | 2001 | Pig                     | Animal_pig           | E. faecium | carcasses        | 0        | 0    | 0    | 0    | 0              | 141 | 5    | 5   | 1   | 9    | 1   | 1    | 5   | 1 |
| 987  | E1782       | 142 | 2          | 3             | BEL     | 2001 | Pig                     | Animal_pig           | E. faecium | carcasses        | 0        | 0    |      |      | 142            | 5   | 4    | 12  | 6   | 1    | 1   | 8    | 1   |   |
| 988  | E1776       | 143 | 3          | 2             | BEL     | 2001 | Pig                     | Animal_pig           | E. faecium | Faeces           | 0        | 0    |      |      | 143            | 29  | 2    | 12  | 6   | 1    | 1   | 1    | 1   |   |
| 989  | E1780       | 144 | 2          | 1             | BEL     | 2001 | Pig                     | Animal_pig           | E. faecium | carcasses        | 0        | 0    |      |      | 144            | 28  | 2    | 1   | 12  | 2    | 34  | 5    | 1   |   |
| 990  | A0041       | 145 | 2          | 1             | DEU     |      | Hospitalized patient    | Clin_Isol            | E. faecium | Wound            | 0        | 1    |      |      | 145            | 5   | 1    | 1   | 1   | 1    | 1   | 8    | 1   |   |
| 991  | A0869       | 145 | 2          | 1             | DEU     | 2002 | Hospitalized patient    | Clin_Isol            | E. faecium | peritonitis      | 0        | 1    |      |      | 145            | 5   | 1    | 1   | 1   | 1    | 1   | 8    | 1   |   |
| 992  | E0027       | 146 | 3          | 3             | GBR     | 1992 | Hospitalized patient    | Hosp_Surv            | E. faecium | Faeces           | 0        | 0    |      |      | 146            | 3   | 2    | 6   | 6   | 1    | 1   | 1    | 1   |   |
| 993  | A0252       | 146 | 3          | 3             | NOR     | 1999 | Poultry                 | Animal_Poultry       | E. faecium | Faeces           |          |      |      |      | 146            | 3   | 2    | 6   | 6   | 1    | 1   | 1    | 1   |   |
| 994  | E0060       | 147 | 2          | 1             | NLD     | 1996 | Non-hospitalized person | Comm_Surv            | E. faecium | Faeces           | 0        | 0    | 0    | 0    | 0              | 147 | 5    | 2   | 1   | 9    | 1   | 2    | 5   | 1 |
| 995  | E0675       | 148 | 2          | 1             | ESP     |      | Poultry                 | Animal_Poultry       | E. faecium | Faeces           | 0        | 0    |      |      | 148            | 5   | 2    | 1   | 3   | 1    | 1   | 1    | 1   |   |
| 996  | E4464       | 148 | 2          | 1             | NLD     | 2008 | Dog                     | Animal_Dog           | E. faecium | Faeces           |          | 1    |      |      | 148            | 5   | 2    | 1   | 3   | 1    | 1   | 1    | 1   |   |
| 997  | A0065       | 149 | 3          | 2             | BEL     |      | Pig                     | Animal_pig           | E. faecium |                  |          |      |      |      | 149            | 4   | 2    | 12  | 9   | 1    | 20  | 5    | 1   |   |
| 998  | A2191       | 149 | 3          | 2             |         |      | Pig                     | Animal_Pig           | E. faecium | Faeces           |          |      |      |      | 149            | 4   | 2    | 12  | 9   | 1    | 20  | 5    | 1   |   |
| 999  | E0678       | 149 | 3          | 2             | BEL     |      | Pig                     | Animal_Pig           | E. faecium | Faeces           | 0        | 0    |      |      | 149            | 4   | 2    | 12  | 9   | 1    | 20  | 5    | 1   |   |
| 1000 | E0679       | 150 | 2          | 3             | BEL     |      | Pig                     | Animal_Pig           | E. faecium | Faeces           | 0        | 0    |      |      | 150            | 5   | 4    | 12  | 9   | 1    | 1   | 5    | 1   |   |
| 1001 | E0680       | 151 | 2          | 1             | DEU     |      | Pig                     | Animal_Pig           | E. faecium | Faeces           | 0        | 0    |      |      | 151            | 5   | 5    | 1   | 6   | 1    | 1   | 1    | 1   |   |
| 1002 | E0682       | 151 | 2          | 1             | DEU     |      | Pig                     | Animal_Pig           | E. faecium | Faeces           | 0        | 0    |      |      | 151            | 5   | 5    | 1   | 6   | 1    | 1   | 1    | 1   |   |
| 1003 | E0683       | 152 | 1          | 1             | ESP     |      | Pig                     | Animal_Pig           | E. faecium | Faeces           | 0        | 0    |      |      | 152            | 9   | 8    | 8   | 17  | 1    | 19  | 6    | 1   |   |
| 1004 | E0684       | 153 | 2          | 1             | ESP     |      | Pig                     | Animal_Pig           | E. faecium | Faeces           | 0        | 0    |      |      | 153            | 21  | 5    | 12  | 3   | 1    | 20  | 1    | 1   |   |
| 1005 | E1131       | 154 | 2          | 1             | USA     | 2001 | Hospitalized patient    | Clin_Isol            | E. faecium | Bronchoscopy spe | 0        | 1    |      |      | 154            | 9   | 2    | 1   | 1   | 1    | 1   | 1    | 1   |   |
| 1006 | E2190       | 154 | 2          | 1             | USA     | 2001 | Environment             | Environment_Hospital | E. faecium | Vent             | 1        |      |      |      | 154            | 9   | 2    | 1   | 1   | 1    | 1   | 1    | 1   |   |
| 1007 | E0687       | 155 | 1          | 1             | ESP     |      | Pig                     | Animal_Pig           | E. faecium | Faeces           | 0        | 0    |      |      | 155            | 25  | 13   | 23  | 17  | 10   | 35  | 13   | 1   |   |
| 1008 | E0696       | 156 | 2          | 1             | GBR     |      | Sewage                  | Environment          | E. faecium | Faeces           | 0        | 0    | 0    | 0    | 0              | 156 | 5    | 2   | 12  | 9    | 1   | 1    | 5   | 1 |



Supplementary Table 1. Meta-data of isolates included in this study

| No   | Strain code | ST  | BAPS group | BAPS subgroup | country | year | Source                  | Epidemiology                  | Species    | Isol_site        | esp_gene | ampR | SgrA | EcbA | Genomic island | ST  | AtpA | Ddl | Gdh | PurK | Gyd | PstS | Adk |
|------|-------------|-----|------------|---------------|---------|------|-------------------------|-------------------------------|------------|------------------|----------|------|------|------|----------------|-----|------|-----|-----|------|-----|------|-----|
| 1009 | A0064       | 157 | 2          |               | 1 BEL   |      | Poultry                 | Animal_Poultry                | E. faecium |                  |          |      |      |      | 157            | 9   | 2    | 6   | 6   | 1    | 7   | 1    |     |
| 1010 | E0699       | 157 | 2          |               | 1 GBR   |      | Hospitalized patient    | Clin_Isol                     | E. faecium |                  | 0        | 1    |      | 0    | 157            | 9   | 2    | 6   | 6   | 1    | 7   | 1    |     |
| 1011 | E4427       | 157 | 2          |               | 1 GBR   |      | Dog                     | Animal_Dog                    | E. faecium | Faeces           | 0        | 1    |      |      | 157            | 9   | 2    | 6   | 6   | 1    | 7   | 1    |     |
| 1012 | E1575       | 158 | 2          |               | 1 BEL   | 1995 | Poultry                 | Animal_Poultry                | E. faecium | Faeces           | 0        | 0    |      |      | 158            | 9   | 2    | 6   | 6   | 1    | 36  | 1    |     |
| 1013 | E1576       | 159 | 3          |               | 1 ZAF   | 2001 | Ostrich                 | Animal_Ostrich                | E. faecium | Faeces           | 0        | 0    | 0    | 0    | 159            | 30  | 3    | 1   | 2   | 1    | 1   | 1    |     |
| 1014 | E2068       | 159 | 3          |               | 1 DNK   | 2001 | Pig                     | Animal_pig                    | E. faecium |                  |          | 0    |      |      | 159            | 30  | 3    | 1   | 2   | 1    | 1   | 1    |     |
| 1015 | A1354       | 160 | 3          |               | 2       |      |                         |                               | E. faecium |                  |          |      |      |      | 160            | 4   | 3    | 1   | 27  | 1    | 1   | 1    |     |
| 1016 | A2217       | 160 | 3          |               | 2       |      |                         |                               | E. faecium | Faeces           |          |      |      |      | 160            | 4   | 3    | 1   | 27  | 1    | 1   | 1    |     |
| 1017 | E1578       | 160 | 3          |               | 2 DEU   | 2001 | Mini pig                | Animal_Pig                    | E. faecium | Faeces           | 0        | 0    |      |      | 160            | 4   | 3    | 1   | 27  | 1    | 1   | 1    |     |
| 1018 | E4183       | 160 | 3          |               | 2       |      |                         |                               | E. faecium |                  |          |      |      |      | 160            | 4   | 3    | 1   | 27  | 1    | 1   | 1    |     |
| 1019 | E1583       | 161 | 3          |               | 3 BEL   | 2001 | Non-hospitalized person | Comm_Surv                     | E. faecium | Faeces           | 0        | 0    | 1    | 0    | 0              | 161 | 3    | 2   | 1   | 11   | 1   | 14   | 6   |
| 1020 | E1585       | 162 | 3          |               | 3 DEU   | 2001 | Hospitalized patient    | Clin_Isol                     | E. faecium | Urine            | 0        | 1    |      |      | 162            | 7   | 2    | 6   | 6   | 5    | 1   | 1    |     |
| 1021 | E1590       | 163 | 1          |               | IRL     | 2001 | Non-hospitalized person | Comm_Surv                     | E. faecium | Faeces           | 0        | 0    | 0    | 0    | 0              | 163 | 5    | 13  | 9   | 15   | 8   | 37   | 6   |
| 1022 | A0159       | 163 | 1          |               | BRA     |      |                         |                               | E. faecium |                  |          |      |      |      | 163            | 5   | 13   | 9   | 15  | 8    | 37  | 6    |     |
| 1023 | A0171       | 163 | 1          |               | BRA     |      | Pig                     | Animal_pig                    | E. faecium | Faeces           |          |      |      |      | 163            | 5   | 13   | 9   | 15  | 8    | 37  | 6    |     |
| 1024 | E1685       | 164 | 4          |               | BRA     | 1998 | Hospitalized patient    | Hosp_Surv                     | E. faecium | Faeces           | 0        |      |      |      | 164            | 27  | 18   | 22  | 28  | 16   | 33  | 13   |     |
| 1025 | A1160       | 165 | 2          |               | 3 ITA   | 2005 | Hospitalized patient    | Clin_isol                     | E. faecium | Blood            | 0        | 1    |      |      | 165            | 15  | 3    | 1   | 14  | 1    | 1   | 1    |     |
| 1026 | E0721       | 165 | 2          |               | 3 NLD   | 2000 | Hospitalized patient    | Hosp_Surv                     | E. faecium | Faeces           | 0        | 0    |      |      | 165            | 15  | 3    | 1   | 14  | 1    | 1   | 1    |     |
| 1027 | E0782       | 166 | 2          |               | 1 NLD   | 2000 | Hospitalized patient    | Hosp_Surv                     | E. faecium | Faeces           | 0        | 1    |      |      | 166            | 15  | 1    | 6   | 6   | 18   | 1   | 1    |     |
| 1028 | E0836       | 167 | 2          |               | 1 NLD   | 2000 | Hospitalized patient    | Hosp_Surv                     | E. faecium | Faeces           | 0        | 1    |      |      | 167            | 5   | 1    | 1   | 1   | 1    | 7   | 1    |     |
| 1029 | A1132       | 168 | 3          |               | 3 ITA   | 2005 | Hospitalized patient    | Clin_isol                     | E. faecium | Bile             | 1        | 1    |      |      | 168            | 14  | 5    | 1   | 1   | 1    | 1   | 1    |     |
| 1030 | A1834       | 168 | 3          |               | 3 SWE   |      | Hospitalized patient    | Clin_Isol                     | E. faecium | Blood            |          |      |      |      | 168            | 14  | 5    | 1   | 1   | 1    | 1   | 1    |     |
| 1031 | E1720       | 168 | 3          |               | 3 DNK   |      | Hospitalized patient    | Hosp_Surv                     | E. faecium | nd               | 0        | 1    |      |      | 168            | 14  | 5    | 1   | 1   | 1    | 1   | 1    |     |
| 1032 | E4454       | 168 | 3          |               | 3 NLD   | 2008 | Dog                     | Animal_Dog                    | E. faecium | Faeces           |          | 1    |      |      | 168            | 14  | 5    | 1   | 1   | 1    | 1   | 1    |     |
| 1033 | E4459       | 168 | 3          |               | 3 NLD   | 2008 | Dog                     | Animal_Dog                    | E. faecium | Faeces           |          | 1    |      |      | 168            | 14  | 5    | 1   | 1   | 1    | 1   | 1    |     |
| 1034 | E1721       | 169 | 3          |               | 1 TZA   |      | Hospitalized patient    | Clin_Isol                     | E. faecium | Blood            | 0        | 0    | 1    | 1    | 1              | 169 | 7    | 3   | 1   | 5    | 5   | 1    | 3   |
| 1035 | E1724       | 170 | 2          |               | 3 TZA   |      | Hospitalized patient    | Clin_Isol                     | E. faecium | Blood            | 0        | 0    |      |      | 170            | 9   | 3    | 1   | 5   | 1    | 1   | 3    |     |
| 1036 | E1727       | 171 | 2          |               | 3 TZA   |      | Hospitalized patient    | Clin_Isol                     | E. faecium | Blood            | 0        | 0    |      |      | 171            | 9   | 3    | 1   | 28  | 5    | 1   | 3    |     |
| 1037 | E1759       | 172 | 1          |               | FRA     | 1985 | Environment             | Environment                   | E. faecium |                  | 0        | 0    | 1    | 0    | 0              | 172 | 25   | 13  | 18  | 15   | 10  | 29   | 6   |
| 1038 | A0261       | 172 | 1          |               | FRA     |      |                         |                               | E. faecium |                  |          | 0    |      |      | 172            | 25  | 13   | 18  | 15  | 10   | 29  | 6    |     |
| 1039 | E2059       | 172 | 1          |               | FRA     | 1994 | Hospitalized patient    | Clin_Isol                     | E. faecium |                  |          |      |      |      | 172            | 25  | 13   | 18  | 15  | 10   | 29  | 6    |     |
| 1040 | E1760       | 173 | 3          |               | 3 AUS   | 2000 | Hospitalized patient    | Hospital outbreak Australia-2 | E. faecium | nd               | 0        | 1    | 1    | 0    | 1              | 173 | 7    | 1   | 1   | 29   | 12  | 1    | 1   |
| 1041 | E1761       | 173 | 3          |               | 3 AUS   | 2000 | Hospitalized patient    | Hospital outbreak Australia-2 | E. faecium | nd               | 0        | 1    |      |      | 173            | 7   | 1    | 1   | 29  | 12   | 1   | 1    |     |
| 1042 | E1762       | 174 | 3          |               | 3 AUS   | 2000 | Hospitalized patient    | Hosp_Surv                     | E. faecium | nd               | 1        | 1    | 1    | 1    | 1              | 174 | 1    | 1   | 1   | 29   | 1   | 1    | 1   |
| 1043 | E0691       | 175 | 2          |               | 1 ESP   |      | Pig                     | Animal_Pig                    | E. faecium | Faeces           | 0        | 0    |      |      | 175            | 5   | 5    | 12  | 6   | 1    | 1   | 1    |     |
| 1044 | E0695       | 176 | 2          |               | 1 GBR   |      | Sewage                  | Environment                   | E. faecium | Faeces           | 0        | 0    | 0    | 0    | 0              | 176 | 9    | 2   | 6   | 3    | 1   | 1    | 1   |
| 1045 | E0701       | 177 | 2          |               | 1 GBR   |      | Laboratory              | Laboratory                    | E. faecium |                  | 0        | 1    |      |      | 177            | 15  | 2    | 6   | 6   | 1    | 1   | 1    |     |
| 1046 | A0243       | 178 | 1          |               | 1 NLD   |      |                         |                               | E. faecium |                  |          |      |      |      | 178            | 13  | 8    | 8   | 8   | 6    | 27  | 6    |     |
| 1047 | A0244       | 178 | 1          |               | 1 NLD   |      |                         |                               | E. faecium |                  |          |      |      |      | 178            | 13  | 8    | 8   | 8   | 6    | 27  | 6    |     |
| 1048 | E1733       | 178 | 1          |               | 1 TZA   |      | Hospitalized patient    | Clin_Isol                     | E. faecium | Blood            | 0        | 0    |      |      | 178            | 13  | 8    | 8   | 8   | 6    | 27  | 6    |     |
| 1049 | A0042       | 179 | 1          |               | 1 ITA   |      |                         |                               | E. faecium |                  |          |      |      |      | 179            | 25  | 8    | 10  | 17  | 1    | 19  | 11   |     |
| 1050 | A0043       | 180 | 3          |               | 3 ITA   |      |                         |                               | E. faecium |                  |          |      |      |      | 180            | 1   | 1    | 1   | 1   | 1    | 38  | 1    |     |
| 1051 | A0044       | 181 | 3          |               | 5 BEL   |      | Hospitalized patient    | Clin_Isol                     | E. faecium |                  |          |      |      |      | 181            | 1   | 1    | 1   | 1   | 1    | 33  | 1    |     |
| 1052 | A0045       | 182 | 3          |               | 5 BEL   |      | Hospitalized patient    | Clin_Isol                     | E. faecium |                  |          |      |      |      | 182            | 1   | 1    | 1   | 1   | 1    | 19  | 1    |     |
| 1053 | A0046       | 183 | 3          |               | 4 BEL   |      | Non-hospitalized person | Comm_Surv                     | E. faecium |                  |          |      |      |      | 183            | 4   | 5    | 9   | 3   | 1    | 20  | 1    |     |
| 1054 | A0047       | 184 | 2          |               | 1 BEL   |      | Pig                     | Animal_Pig                    | E. faecium |                  |          |      |      |      | 184            | 5   | 2    | 1   | 3   | 1    | 1   | 5    |     |
| 1055 | A2194       | 184 | 2          |               | 1       |      | Pig                     | Animal_Pig                    | E. faecium | Faeces           |          |      |      |      | 184            | 5   | 2    | 1   | 3   | 1    | 1   | 5    |     |
| 1056 | A2199       | 184 | 2          |               | 1       |      | Pig                     | Animal_Pig                    | E. faecium | Faeces           |          |      |      |      | 184            | 5   | 2    | 1   | 3   | 1    | 1   | 5    |     |
| 1057 | A0049       | 185 | 2          |               | 1 BEL   |      | Hospitalized patient    | Clin_Isol                     | E. faecium |                  |          |      |      |      | 185            | 5   | 2    | 1   | 9   | 1    | 20  | 5    |     |
| 1058 | A0050       | 186 | 3          |               | 3 BEL   |      | Hospitalized patient    | Clin_Isol                     | E. faecium |                  |          |      |      |      | 186            | 7   | 2    | 1   | 1   | 5    | 1   | 1    |     |
| 1059 | E1987       | 186 | 3          |               | 3 DEU   | 2000 | Hospitalized patient    |                               | E. faecium | WA               |          |      |      |      | 186            | 7   | 2    | 1   | 1   | 5    | 1   | 1    |     |
| 1060 | E4156       | 186 | 3          |               | 3 GBR   | 1998 | Hospitalized patient    | Clin_Isol                     | E. faecium | Blood            | 1        | 1    |      |      | 186            | 7   | 2    | 1   | 1   | 5    | 1   | 1    |     |
| 1061 | U0050       | 186 | 3          |               | 3 NLD   | 2002 | Hospitalized patient    | Clin_Isol                     | E. faecium | Drain fluid      | 1        | 1    |      |      | 186            | 7   | 2    | 1   | 1   | 5    | 1   | 1    |     |
| 1062 | U0141       | 186 | 3          |               | 3 NLD   | 2004 | Hospitalized patient    | Hosp_Surv                     | E. faecium | Faeces           | 1        | 1    |      |      | 186            | 7   | 2    | 1   | 1   | 5    | 1   | 1    |     |
| 1063 | U0142       | 186 | 3          |               | 3 NLD   | 2004 | Hospitalized patient    | Hosp_Surv                     | E. faecium | Faeces           | 0        | 1    |      |      | 186            | 7   | 2    | 1   | 1   | 5    | 1   | 1    |     |
| 1064 | A0048       | 187 | 3          |               | 3 BEL   |      | Pig                     | Animal_pig                    | E. faecium |                  |          |      |      |      | 187            | 31  | 1    | 1   | 1   | 1    | 1   | 1    |     |
| 1065 | A0051       | 188 | 2          |               | 3 ITA   |      |                         |                               | E. faecium |                  |          |      |      |      | 188            | 32  | 3    | 1   | 6   | 1    | 1   | 1    |     |
| 1066 | A0052       | 189 | 3          |               | 3 ITA   |      |                         |                               | E. faecium |                  |          |      |      |      | 189            | 3   | 2    | 1   | 9   | 1    | 20  | 5    |     |
| 1067 | A1044       | 189 | 3          |               | 3 DEU   | 1992 | Hospitalized patient    |                               | E. faecium |                  |          |      |      |      | 189            | 3   | 2    | 1   | 9   | 1    | 20  | 5    |     |
| 1068 | A0053       | 190 | 2          |               | 3 ITA   |      |                         |                               | E. faecium |                  |          |      |      |      | 190            | 5   | 3    | 6   | 6   | 2    | 20  | 1    |     |
| 1069 | A0054       | 191 | 3          |               | 3 ITA   |      |                         |                               | E. faecium |                  |          |      |      |      | 191            | 2   | 2    | 1   | 6   | 1    | 7   | 1    |     |
| 1070 | A0055       | 192 | 2          |               | 1 ITA   |      |                         |                               | E. faecium |                  |          |      |      |      | 192            | 15  | 1    | 1   | 1   | 1    | 7   | 1    |     |
| 1071 | A0088       | 192 | 2          |               | 1 KOR   | 2002 | Hospitalized patient    | Clin_Isol                     | E. faecium | Blood,peripheral | 1        |      |      |      | 192            | 15  | 1    | 1   | 1   | 1    | 7   | 1    |     |

Supplementary Table 1. Meta-data of isolates included in this study

| No   | Strain code | ST  | BAPS group | BAPS subgroup | country | year | Source               | Epidemiology | Species    | Isol_site          | esp_gene | ampR | SgrA | EcbA | Genomic island | ST | AtpA | Ddl | Gdh | PurK | Gyd | PstS | Adk |
|------|-------------|-----|------------|---------------|---------|------|----------------------|--------------|------------|--------------------|----------|------|------|------|----------------|----|------|-----|-----|------|-----|------|-----|
| 1072 | A0092       | 192 | 2          |               | 1 KOR   | 2002 | Hospitalized patient | Clin_Isol    | E. faecium | Urine, catheterize | 1        |      |      |      | 192            | 15 | 1    | 1   | 1   | 1    | 7   | 1    |     |
| 1073 | A0093       | 192 | 2          |               | 1 KOR   | 2002 | Hospitalized patient | Clin_Isol    | E. faecium | Blood,central line | 1        |      |      |      | 192            | 15 | 1    | 1   | 1   | 1    | 7   | 1    |     |
| 1074 | A0094       | 192 | 2          |               | 1 KOR   | 2002 | Hospitalized patient | Clin_Isol    | E. faecium | Urine, catheterize | 1        |      |      |      | 192            | 15 | 1    | 1   | 1   | 1    | 7   | 1    |     |
| 1075 | A0095       | 192 | 2          |               | 1 KOR   | 2002 | Hospitalized patient | Clin_Isol    | E. faecium | Urine, voided      | 1        |      |      |      | 192            | 15 | 1    | 1   | 1   | 1    | 7   | 1    |     |
| 1076 | A0096       | 192 | 2          |               | 1 KOR   | 2002 | Hospitalized patient | Clin_Isol    | E. faecium | Urine, catheterize | 1        |      |      |      | 192            | 15 | 1    | 1   | 1   | 1    | 7   | 1    |     |
| 1077 | A0112       | 192 | 2          |               | 1 KOR   | 2003 | Hospitalized patient | Clin_Isol    | E. faecium | Urine, voided      | 1        |      |      |      | 192            | 15 | 1    | 1   | 1   | 1    | 7   | 1    |     |
| 1078 | A0114       | 192 | 2          |               | 1 KOR   | 2003 | Hospitalized patient | Clin_Isol    | E. faecium | Tissue             | 1        |      |      |      | 192            | 15 | 1    | 1   | 1   | 1    | 7   | 1    |     |
| 1079 | A0118       | 192 | 2          |               | 1 KOR   | 2003 | Hospitalized patient | Clin_Isol    | E. faecium | Gastric aspirate   | 1        |      |      |      | 192            | 15 | 1    | 1   | 1   | 1    | 7   | 1    |     |
| 1080 | A0122       | 192 | 2          |               | 1 KOR   | 2003 | Hospitalized patient | Clin_Isol    | E. faecium | Pus, open          | 1        |      |      |      | 192            | 15 | 1    | 1   | 1   | 1    | 7   | 1    |     |
| 1081 | A0145       | 192 | 2          |               | 1 KOR   | 2003 | Hospitalized patient | Hosp_Surv    | E. faecium | Rectal swab        | 1        |      |      |      | 192            | 15 | 1    | 1   | 1   | 1    | 7   | 1    |     |
| 1082 | A0146       | 192 | 2          |               | 1 KOR   | 2003 | Hospitalized patient | Clin_Isol    | E. faecium | Blood,central line | 1        |      |      |      | 192            | 15 | 1    | 1   | 1   | 1    | 7   | 1    |     |
| 1083 | A0750       | 192 | 2          |               | 1 KOR   | 2004 | Hospitalized patient |              | E. faecium |                    | 1        | 1    |      |      | 192            | 15 | 1    | 1   | 1   | 1    | 7   | 1    |     |
| 1084 | A0756       | 192 | 2          |               | 1 KOR   | 2004 | Hospitalized patient |              | E. faecium |                    | 1        | 1    |      |      | 192            | 15 | 1    | 1   | 1   | 1    | 7   | 1    |     |
| 1085 | A0759       | 192 | 2          |               | 1 KOR   | 2004 | Hospitalized patient |              | E. faecium |                    | 1        | 1    |      |      | 192            | 15 | 1    | 1   | 1   | 1    | 7   | 1    |     |
| 1086 | A0760       | 192 | 2          |               | 1 KOR   | 2004 | Hospitalized patient |              | E. faecium |                    | 1        | 1    |      |      | 192            | 15 | 1    | 1   | 1   | 1    | 7   | 1    |     |
| 1087 | A0761       | 192 | 2          |               | 1 KOR   | 2004 | Hospitalized patient |              | E. faecium |                    | 1        | 1    |      |      | 192            | 15 | 1    | 1   | 1   | 1    | 7   | 1    |     |
| 1088 | A0762       | 192 | 2          |               | 1 KOR   | 2004 | Hospitalized patient |              | E. faecium |                    | 1        | 1    |      |      | 192            | 15 | 1    | 1   | 1   | 1    | 7   | 1    |     |
| 1089 | A0763       | 192 | 2          |               | 1 KOR   | 2004 | Hospitalized patient |              | E. faecium |                    | 1        | 1    |      |      | 192            | 15 | 1    | 1   | 1   | 1    | 7   | 1    |     |
| 1090 | A0767       | 192 | 2          |               | 1 KOR   | 2004 | Hospitalized patient |              | E. faecium |                    | 1        | 1    |      |      | 192            | 15 | 1    | 1   | 1   | 1    | 7   | 1    |     |
| 1091 | A0770       | 192 | 2          |               | 1 KOR   | 2004 | Hospitalized patient |              | E. faecium |                    | 1        | 1    |      |      | 192            | 15 | 1    | 1   | 1   | 1    | 7   | 1    |     |
| 1092 | A0870       | 192 | 2          |               | 1 DEU   | 2004 | Hospitalized patient | Clin_Isol    | E. faecium | urine              | 1        | 1    |      |      | 192            | 15 | 1    | 1   | 1   | 1    | 7   | 1    |     |
| 1093 | A0871       | 192 | 2          |               | 1 DEU   | 2004 | Hospitalized patient | Clin_Isol    | E. faecium | blood              | 1        | 1    |      |      | 192            | 15 | 1    | 1   | 1   | 1    | 7   | 1    |     |
| 1094 | A0872       | 192 | 2          |               | 1 DEU   | 2004 | Hospitalized patient | Clin_Isol    | E. faecium | blood              | 1        | 1    |      |      | 192            | 15 | 1    | 1   | 1   | 1    | 7   | 1    |     |
| 1095 | A0873       | 192 | 2          |               | 1 DEU   | 2004 | Hospitalized patient | Clin_Isol    | E. faecium | throat swab        | 1        | 1    |      |      | 192            | 15 | 1    | 1   | 1   | 1    | 7   | 1    |     |
| 1096 | A0880       | 192 | 2          |               | 1 DEU   | 2004 | Hospitalized patient | Hosp_Surv    | E. faecium | stool              | 1        | 1    |      |      | 192            | 15 | 1    | 1   | 1   | 1    | 7   | 1    |     |
| 1097 | A1021       | 192 | 2          |               | 1 DEU   | 2004 | Hospitalized patient | Clin_Isol    | E. faecium | blood              | 1        | 1    |      |      | 192            | 15 | 1    | 1   | 1   | 1    | 7   | 1    |     |
| 1098 | A1506       | 192 | 2          |               | 1 DEU   | 1998 | Hospitalized patient | Clin_Isol    | E. faecium | blood              | 0        | 1    |      |      | 192            | 15 | 1    | 1   | 1   | 1    | 7   | 1    |     |
| 1099 | A1549       | 192 | 2          |               | 1 DEU   | 2004 | Hospitalized patient | Clin_Isol    | E. faecium | blood              | 1        | 1    |      |      | 192            | 15 | 1    | 1   | 1   | 1    | 7   | 1    |     |
| 1100 | A1550       | 192 | 2          |               | 1 DEU   | 2004 | Hospitalized patient | Clin_Isol    | E. faecium | blood              | 1        | 1    |      |      | 192            | 15 | 1    | 1   | 1   | 1    | 7   | 1    |     |
| 1101 | A1567       | 192 | 2          |               | 1 DEU   | 2006 | Hospitalized patient | Clin_Isol    | E. faecium | blood              | 1        | 1    |      |      | 192            | 15 | 1    | 1   | 1   | 1    | 7   | 1    |     |
| 1102 | A1571       | 192 | 2          |               | 1 DEU   | 2006 | Hospitalized patient | Clin_Isol    | E. faecium | blood              | 1        | 1    |      |      | 192            | 15 | 1    | 1   | 1   | 1    | 7   | 1    |     |
| 1103 | A1574       | 192 | 2          |               | 1 DEU   | 2006 | Hospitalized patient | Clin_Isol    | E. faecium | blood              | 1        | 1    |      |      | 192            | 15 | 1    | 1   | 1   | 1    | 7   | 1    |     |
| 1104 | A1575       | 192 | 2          |               | 1 DEU   | 2006 | Hospitalized patient | Clin_Isol    | E. faecium | blood              | 1        | 1    |      |      | 192            | 15 | 1    | 1   | 1   | 1    | 7   | 1    |     |
| 1105 | A1576       | 192 | 2          |               | 1 DEU   | 2006 | Hospitalized patient | Clin_Isol    | E. faecium | blood              | 1        | 1    |      |      | 192            | 15 | 1    | 1   | 1   | 1    | 7   | 1    |     |
| 1106 | A1577       | 192 | 2          |               | 1 DEU   | 2006 | Hospitalized patient | Clin_Isol    | E. faecium | blood              | 1        | 1    |      |      | 192            | 15 | 1    | 1   | 1   | 1    | 7   | 1    |     |
| 1107 | A1578       | 192 | 2          |               | 1 DEU   | 2006 | Hospitalized patient | Clin_Isol    | E. faecium | blood              | 1        | 1    |      |      | 192            | 15 | 1    | 1   | 1   | 1    | 7   | 1    |     |
| 1108 | A1581       | 192 | 2          |               | 1 DEU   | 2006 | Hospitalized patient | Clin_Isol    | E. faecium | blood              | 1        | 1    |      |      | 192            | 15 | 1    | 1   | 1   | 1    | 7   | 1    |     |
| 1109 | A1582       | 192 | 2          |               | 1 DEU   | 2006 | Hospitalized patient | Clin_Isol    | E. faecium | blood              | 1        | 1    |      |      | 192            | 15 | 1    | 1   | 1   | 1    | 7   | 1    |     |
| 1110 | A1583       | 192 | 2          |               | 1 DEU   | 2006 | Hospitalized patient | Clin_Isol    | E. faecium | blood              | 1        | 1    |      |      | 192            | 15 | 1    | 1   | 1   | 1    | 7   | 1    |     |
| 1111 | A1586       | 192 | 2          |               | 1 DEU   | 2006 | Hospitalized patient | Clin_Isol    | E. faecium | blood              | 1        | 1    |      |      | 192            | 15 | 1    | 1   | 1   | 1    | 7   | 1    |     |
| 1112 | A1588       | 192 | 2          |               | 1 DEU   | 2006 | Hospitalized patient | Clin_Isol    | E. faecium | blood              | 1        | 1    |      |      | 192            | 15 | 1    | 1   | 1   | 1    | 7   | 1    |     |
| 1113 | A1592       | 192 | 2          |               | 1 DEU   | 2006 | Hospitalized patient | Clin_Isol    | E. faecium | blood              | 0        | 1    |      |      | 192            | 15 | 1    | 1   | 1   | 1    | 7   | 1    |     |
| 1114 | A1595       | 192 | 2          |               | 1 DEU   | 2006 | Hospitalized patient | Clin_Isol    | E. faecium | blood              | 1        | 1    |      |      | 192            | 15 | 1    | 1   | 1   | 1    | 7   | 1    |     |
| 1115 | A1597       | 192 | 2          |               | 1 DEU   | 2006 | Hospitalized patient | Clin_Isol    | E. faecium | blood              | 1        | 1    |      |      | 192            | 15 | 1    | 1   | 1   | 1    | 7   | 1    |     |
| 1116 | A1599       | 192 | 2          |               | 1 DEU   | 2006 | Hospitalized patient | Clin_Isol    | E. faecium | blood              | 1        | 1    |      |      | 192            | 15 | 1    | 1   | 1   | 1    | 7   | 1    |     |
| 1117 | A1601       | 192 | 2          |               | 1 DEU   | 2006 | Hospitalized patient | Clin_Isol    | E. faecium | blood              | 1        | 1    |      |      | 192            | 15 | 1    | 1   | 1   | 1    | 7   | 1    |     |
| 1118 | A1602       | 192 | 2          |               | 1 DEU   | 2006 | Hospitalized patient | Clin_Isol    | E. faecium | blood              | 1        | 1    |      |      | 192            | 15 | 1    | 1   | 1   | 1    | 7   | 1    |     |
| 1119 | A1606       | 192 | 2          |               | 1 DEU   | 2006 | Hospitalized patient | Clin_Isol    | E. faecium | blood              | 1        | 1    |      |      | 192            | 15 | 1    | 1   | 1   | 1    | 7   | 1    |     |
| 1120 | A1607       | 192 | 2          |               | 1 DEU   | 2006 | Hospitalized patient | Clin_Isol    | E. faecium | blood              | 1        | 1    |      |      | 192            | 15 | 1    | 1   | 1   | 1    | 7   | 1    |     |
| 1121 | A1608       | 192 | 2          |               | 1 DEU   | 2007 | Hospitalized patient | Clin_Isol    | E. faecium | blood              | 1        | 1    |      |      | 192            | 15 | 1    | 1   | 1   | 1    | 7   | 1    |     |
| 1122 | A1612       | 192 | 2          |               | 1 DEU   | 2007 | Hospitalized patient | Clin_Isol    | E. faecium | blood              | 1        | 1    |      |      | 192            | 15 | 1    | 1   | 1   | 1    | 7   | 1    |     |
| 1123 | A1822       | 192 | 2          |               | 1 SWE   |      | Hospitalized patient | Clin_Isol    | E. faecium | Blood              | 1        |      |      |      | 192            | 15 | 1    | 1   | 1   | 1    | 7   | 1    |     |
| 1124 | A1824       | 192 | 2          |               | 1 SWE   |      | Hospitalized patient | Clin_Isol    | E. faecium | Blood              | 1        |      |      |      | 192            | 15 | 1    | 1   | 1   | 1    | 7   | 1    |     |
| 1125 | A1825       | 192 | 2          |               | 1 SWE   |      | Hospitalized patient | Clin_Isol    | E. faecium | Blood              | 1        |      |      |      | 192            | 15 | 1    | 1   | 1   | 1    | 7   | 1    |     |
| 1126 | E4388       | 192 | 2          |               | 1 DNK   |      | Dog                  | Animal_Dog   | E. faecium | Faeces             | 0        | 1    |      |      | 192            | 15 | 1    | 1   | 1   | 1    | 7   | 1    |     |
| 1127 | E4390       | 192 | 2          |               | 1 DNK   |      | Dog                  | Animal_Dog   | E. faecium | Faeces             | 0        | 1    |      |      | 192            | 15 | 1    | 1   | 1   | 1    | 7   | 1    |     |
| 1128 | E4406       | 192 | 2          |               | 1 DNK   |      | Dog                  | Animal_Dog   | E. faecium | Faeces             | 0        | 1    |      |      | 192            | 15 | 1    | 1   | 1   | 1    | 7   | 1    |     |
| 1129 | E4410       | 192 | 2          |               | 1 GBR   |      | Dog                  | Animal_Dog   | E. faecium | Faeces             | 0        | 1    |      |      | 192            | 15 | 1    | 1   | 1   | 1    | 7   | 1    |     |
| 1130 | E4421       | 192 | 2          |               | 1 GBR   |      | Dog                  | Animal_Dog   | E. faecium | Faeces             | 0        | 1    |      |      | 192            | 15 | 1    | 1   | 1   | 1    | 7   | 1    |     |
| 1131 | E4429       | 192 | 2          |               | 1 GBR   |      | Dog                  | Animal_Dog   | E. faecium | Faeces             | 0        | 1    |      |      | 192            | 15 | 1    | 1   | 1   | 1    | 7   | 1    |     |
| 1132 | E4442       | 192 | 2          |               | 1 GBR   |      | Dog                  | Animal_Dog   | E. faecium | Faeces             | 0        | 1    |      |      | 192            | 15 | 1    | 1   | 1   | 1    | 7   | 1    |     |
| 1133 | E4449       | 192 | 2          |               | 1 GBR   |      | Dog                  | Animal_Dog   | E. faecium | Faeces             | 0        | 1    |      |      | 192            | 15 | 1    | 1   | 1   | 1    | 7   | 1    |     |
| 1134 | E4453       | 192 | 2          |               | 1 NLD   | 2008 | Dog                  | Animal_Dog   | E. faecium | Faeces             | 1        |      |      |      | 192            | 15 | 1    | 1   | 1   | 1    | 7   | 1    |     |

Supplementary Table 1. Meta-data of isolates included in this study

| No   | Strain code | ST  | BAPS group | BAPS subgroup | country | year | Source               | Epidemiology   | Species    | isol_site          | esp_gene | ampR | SgrA | EcbA | Genomic island | ST | AtpA | Ddl | Gdh | PurK | Gyd | PstS | Ack |
|------|-------------|-----|------------|---------------|---------|------|----------------------|----------------|------------|--------------------|----------|------|------|------|----------------|----|------|-----|-----|------|-----|------|-----|
| 1135 | E4462       | 192 | 2          |               | 1 NLD   | 2008 | Dog                  | Animal_Dog     | E. faecium | Faeces             |          | 1    |      |      | 192            | 15 | 1    | 1   | 1   | 1    | 7   | 1    |     |
| 1136 | A0056       | 193 | 2          |               | 1 ITA   |      |                      |                | E. faecium |                    |          |      |      |      | 193            | 5  | 2    | 1   | 6   | 2    | 36  | 1    |     |
| 1137 | A0057       | 194 | 2          |               | 1 BEL   |      | Poultry              | Animal_poultry | E. faecium |                    |          |      |      |      | 194            | 5  | 2    | 7   | 6   | 1    | 7   | 1    |     |
| 1138 | A0247       | 194 | 2          |               | 1 NOR   | 1999 | Poultry farmer       | Comm_Surv      | E. faecium | Faeces             |          |      |      |      | 194            | 5  | 2    | 7   | 6   | 1    | 7   | 1    |     |
| 1139 | A2210       | 194 | 2          |               | 1       |      |                      | Animal_Poultry | E. faecium | Faeces             |          |      |      |      | 194            | 5  | 2    | 7   | 6   | 1    | 7   | 1    |     |
| 1140 | A0058       | 195 | 2          |               | 1 BEL   |      | Poultry              | Animal_Poultry | E. faecium |                    |          |      |      |      | 195            | 9  | 2    | 1   | 6   | 1    | 7   | 1    |     |
| 1141 | A0248       | 195 | 2          |               | 1 NOR   | 1999 | Poultry farmer       | Comm_Surv      | E. faecium | Faeces             |          |      |      |      | 195            | 9  | 2    | 1   | 6   | 1    | 7   | 1    |     |
| 1142 | A0251       | 195 | 2          |               | 1 NOR   | 1998 | Poultry              | Animal_Poultry | E. faecium | Faeces             |          |      |      |      | 195            | 9  | 2    | 1   | 6   | 1    | 7   | 1    |     |
| 1143 | A2208       | 195 | 2          |               | 1       |      | Poultry              | Animal_Poultry | E. faecium | Faeces             |          |      |      |      | 195            | 9  | 2    | 1   | 6   | 1    | 7   | 1    |     |
| 1144 | A0059       | 196 | 2          |               | 1 BEL   |      | Poultry              | Animal_Poultry | E. faecium |                    |          |      |      |      | 196            | 5  | 2    | 6   | 6   | 1    | 36  | 1    |     |
| 1145 | A1751       | 196 | 2          |               | 1 USA   | 2005 |                      |                | E. faecium |                    |          |      |      |      | 196            | 5  | 2    | 6   | 6   | 1    | 36  | 1    |     |
| 1146 | A0062       | 197 | 2          |               | 1 BEL   |      | Poultry              | Animal_Poultry | E. faecium |                    |          |      |      |      | 197            | 5  | 2    | 24  | 14  | 1    | 39  | 1    |     |
| 1147 | A0063       | 198 | 2          |               | 1 BEL   |      | Poultry              | Animal_Poultry | E. faecium |                    |          |      |      |      | 198            | 16 | 2    | 6   | 6   | 2    | 7   | 1    |     |
| 1148 | A0066       | 199 | 3          |               | 5 BEL   |      | Poultry              | Animal_Poultry | E. faecium |                    |          |      |      |      | 199            | 2  | 2    | 1   | 30  | 1    | 11  | 1    |     |
| 1149 | A0067       | 200 | 2          |               | 4 BEL   |      | Poultry              | Animal_Poultry | E. faecium |                    |          |      |      |      | 200            | 9  | 2    | 1   | 3   | 1    | 33  | 1    |     |
| 1150 | A0068       | 201 | 2          |               | 1 ITA   |      |                      |                | E. faecium |                    |          |      |      |      | 201            | 15 | 1    | 1   | 1   | 1    | 21  | 1    |     |
| 1151 | A0069       | 202 | 3          |               | 3 ITA   |      |                      |                | E. faecium |                    |          |      |      |      | 202            | 1  | 1    | 1   | 1   | 1    | 7   | 1    |     |
| 1152 | A1121       | 202 | 3          |               | 3 ITA   | 2005 | Hospitalized patient | Clin_isol      | E. faecium | Blood              | 1        | 1    |      |      | 202            | 1  | 1    | 1   | 1   | 1    | 7   | 1    |     |
| 1153 | A1134       | 202 | 3          |               | 3 ITA   | 2005 | Hospitalized patient | Clin_isol      | E. faecium | Urine              | 1        | 1    |      |      | 202            | 1  | 1    | 1   | 1   | 1    | 7   | 1    |     |
| 1154 | A1135       | 202 | 3          |               | 3 ITA   | 2005 | Hospitalized patient | Clin_isol      | E. faecium | Urine              | 1        | 1    |      |      | 202            | 1  | 1    | 1   | 1   | 1    | 7   | 1    |     |
| 1155 | A1142       | 202 | 3          |               | 3 ITA   | 2005 | Hospitalized patient | Clin_isol      | E. faecium | Urine              | 0        | 1    |      |      | 202            | 1  | 1    | 1   | 1   | 1    | 7   | 1    |     |
| 1156 | A1143       | 202 | 3          |               | 3 ITA   | 2005 | Hospitalized patient | Clin_isol      | E. faecium | Broncoaspirate     | 1        | 1    |      |      | 202            | 1  | 1    | 1   | 1   | 1    | 7   | 1    |     |
| 1157 | A1147       | 202 | 3          |               | 3 ITA   | 2005 | Hospitalized patient | Clin_isol      | E. faecium | Bile               | 1        | 1    |      |      | 202            | 1  | 1    | 1   | 1   | 1    | 7   | 1    |     |
| 1158 | A1495       | 202 | 3          |               | 3 DEU   | 1995 | Hospitalized patient | Clin_Isol      | E. faecium | blood              | 0        | 1    |      |      | 202            | 1  | 1    | 1   | 1   | 1    | 7   | 1    |     |
| 1159 | A1503       | 202 | 3          |               | 3 DEU   | 1997 | Hospitalized patient | Clin_Isol      | E. faecium | blood              | 0        | 1    |      |      | 202            | 1  | 1    | 1   | 1   | 1    | 7   | 1    |     |
| 1160 | A1504       | 202 | 3          |               | 3 DEU   | 1997 | Hospitalized patient | Clin_Isol      | E. faecium | blood              | 0        | 1    |      |      | 202            | 1  | 1    | 1   | 1   | 1    | 7   | 1    |     |
| 1161 | A1505       | 202 | 3          |               | 3 DEU   | 1997 | Hospitalized patient | Clin_Isol      | E. faecium | blood              | 0        | 1    |      |      | 202            | 1  | 1    | 1   | 1   | 1    | 7   | 1    |     |
| 1162 | A1564       | 202 | 3          |               | 3 DEU   | 2006 | Hospitalized patient | Clin_Isol      | E. faecium | blood              | 1        | 1    |      |      | 202            | 1  | 1    | 1   | 1   | 1    | 7   | 1    |     |
| 1163 | A1570       | 202 | 3          |               | 3 DEU   | 2006 | Hospitalized patient | Clin_Isol      | E. faecium | blood              | 1        | 1    |      |      | 202            | 1  | 1    | 1   | 1   | 1    | 7   | 1    |     |
| 1164 | A1615       | 202 | 3          |               | 3 DEU   | 2007 | Hospitalized patient | Clin_Isol      | E. faecium | blood              | 1        | 1    |      |      | 202            | 1  | 1    | 1   | 1   | 1    | 7   | 1    |     |
| 1165 | A2059       | 202 | 3          |               | 3 RUS   | 2004 | Hospitalized patient | Clin_Isol      | E. faecium | Urine              | 1        | 1    |      |      | 202            | 1  | 1    | 1   | 1   | 1    | 7   | 1    |     |
| 1166 | A2060       | 202 | 3          |               | 3 RUS   | 2004 | Hospitalized patient | Clin_Isol      | E. faecium | Urine              | 1        | 1    |      |      | 202            | 1  | 1    | 1   | 1   | 1    | 7   | 1    |     |
| 1167 | A2061       | 202 | 3          |               | 3 RUS   | 2004 | Hospitalized patient | Clin_Isol      | E. faecium | Urine              | 1        | 1    |      |      | 202            | 1  | 1    | 1   | 1   | 1    | 7   | 1    |     |
| 1168 | A2062       | 202 | 3          |               | 3 RUS   | 2004 | Hospitalized patient | Clin_Isol      | E. faecium | Urine              | 1        | 1    |      |      | 202            | 1  | 1    | 1   | 1   | 1    | 7   | 1    |     |
| 1169 | A2063       | 202 | 3          |               | 3 RUS   | 2004 | Hospitalized patient | Hosp_Surv      | E. faecium | Faeces             | 1        | 1    |      |      | 202            | 1  | 1    | 1   | 1   | 1    | 7   | 1    |     |
| 1170 | A2064       | 202 | 3          |               | 3 RUS   | 2005 | Hospitalized patient | Clin_Isol      | E. faecium | Throat             | 1        | 1    |      |      | 202            | 1  | 1    | 1   | 1   | 1    | 7   | 1    |     |
| 1171 | A2065       | 202 | 3          |               | 3 RUS   | 2005 | Hospitalized patient | Hosp_Surv      | E. faecium | Faeces             | 1        | 1    |      |      | 202            | 1  | 1    | 1   | 1   | 1    | 7   | 1    |     |
| 1172 | A2066       | 202 | 3          |               | 3 RUS   | 2005 | Hospitalized patient | Clin_Isol      | E. faecium | Blood              | 1        | 1    |      |      | 202            | 1  | 1    | 1   | 1   | 1    | 7   | 1    |     |
| 1173 | A2067       | 202 | 3          |               | 3 RUS   | 2005 | Hospitalized patient | Hosp_Surv      | E. faecium | Faeces             | 1        | 1    |      |      | 202            | 1  | 1    | 1   | 1   | 1    | 7   | 1    |     |
| 1174 | A2068       | 202 | 3          |               | 3 RUS   | 2006 | Hospitalized patient | Hosp_Surv      | E. faecium | Faeces             | 1        | 1    |      |      | 202            | 1  | 1    | 1   | 1   | 1    | 7   | 1    |     |
| 1175 | A2069       | 202 | 3          |               | 3 RUS   | 2006 | Hospitalized patient | Hosp_Surv      | E. faecium | Faeces             | 1        | 1    |      |      | 202            | 1  | 1    | 1   | 1   | 1    | 7   | 1    |     |
| 1176 | E1998       | 202 | 3          |               | 3 DEU   | 2000 | Hospitalized patient |                | E. faecium | K-Urin             |          |      |      |      | 202            | 1  | 1    | 1   | 1   | 1    | 7   | 1    |     |
| 1177 | E2037       | 202 | 3          |               | 3 DEU   | 2000 | Hospitalized patient |                | E. faecium | WA                 |          |      |      |      | 202            | 1  | 1    | 1   | 1   | 1    | 7   | 1    |     |
| 1178 | A0072       | 203 | 2          |               | 1 KOR   | 1998 | Hospitalized patient | Clin_Isol      | E. faecium | Pus                | 1        |      |      |      | 203            | 15 | 1    | 1   | 1   | 1    | 20  | 1    |     |
| 1179 | A0074       | 203 | 2          |               | 1 KOR   | 1998 | Hospitalized patient | Clin_Isol      | E. faecium | Others             | 1        |      |      |      | 203            | 15 | 1    | 1   | 1   | 1    | 20  | 1    |     |
| 1180 | A0077       | 203 | 2          |               | 1 KOR   | 1999 | Hospitalized patient | Clin_Isol      | E. faecium | Sputum             | 1        |      |      |      | 203            | 15 | 1    | 1   | 1   | 1    | 20  | 1    |     |
| 1181 | A0078       | 203 | 2          |               | 1 KOR   | 1999 | Hospitalized patient | Clin_Isol      | E. faecium | Others             | 1        |      |      |      | 203            | 15 | 1    | 1   | 1   | 1    | 20  | 1    |     |
| 1182 | A0082       | 203 | 2          |               | 1 KOR   | 1999 | Hospitalized patient |                | E. faecium |                    | 1        |      |      |      | 203            | 15 | 1    | 1   | 1   | 1    | 20  | 1    |     |
| 1183 | A0086       | 203 | 2          |               | 1 KOR   | 2002 | Hospitalized patient | Clin_Isol      | E. faecium | Others             | 1        |      |      |      | 203            | 15 | 1    | 1   | 1   | 1    | 20  | 1    |     |
| 1184 | A0102       | 203 | 2          |               | 1 KOR   | 2002 | Hospitalized patient | Clin_Isol      | E. faecium | Blood,central line | 1        |      |      |      | 203            | 15 | 1    | 1   | 1   | 1    | 20  | 1    |     |
| 1185 | A0141       | 203 | 2          |               | 1 KOR   | 2000 | Hospitalized patient | Clin_Isol      | E. faecium | CSF                | 1        |      |      |      | 203            | 15 | 1    | 1   | 1   | 1    | 20  | 1    |     |
| 1186 | A0142       | 203 | 2          |               | 1 KOR   | 2003 | Hospitalized patient | Hosp_Surv      | E. faecium | Rectal swab        | 1        |      |      |      | 203            | 15 | 1    | 1   | 1   | 1    | 20  | 1    |     |
| 1187 | A0173       | 203 | 2          |               | 1 DEU   | 2004 | Hospitalized patient | Hosp_Surv      | E. faecium | Perianal swab      | 1        | 1    |      |      | 203            | 15 | 1    | 1   | 1   | 1    | 20  | 1    |     |
| 1188 | A0175       | 203 | 2          |               | 1 KOR   | 2003 | Hospitalized patient | Clin_Isol      | E. faecium | Urine              | 1        |      |      |      | 203            | 15 | 1    | 1   | 1   | 1    | 20  | 1    |     |
| 1189 | A0751       | 203 | 2          |               | 1 KOR   | 2004 | Hospitalized patient |                | E. faecium |                    | 1        | 1    |      |      | 203            | 15 | 1    | 1   | 1   | 1    | 20  | 1    |     |
| 1190 | A0765       | 203 | 2          |               | 1 KOR   | 2004 | Hospitalized patient |                | E. faecium |                    | 1        | 1    |      |      | 203            | 15 | 1    | 1   | 1   | 1    | 20  | 1    |     |
| 1191 | A0766       | 203 | 2          |               | 1 KOR   | 2004 | Hospitalized patient |                | E. faecium |                    | 1        | 1    |      |      | 203            | 15 | 1    | 1   | 1   | 1    | 20  | 1    |     |
| 1192 | A0769       | 203 | 2          |               | 1 KOR   | 2004 | Hospitalized patient |                | E. faecium |                    | 1        | 1    |      |      | 203            | 15 | 1    | 1   | 1   | 1    | 20  | 1    |     |
| 1193 | A0874       | 203 | 2          |               | 1 DEU   | 2004 | Hospitalized patient | Hosp_Surv      | E. faecium | stool              | 1        | 1    |      |      | 203            | 15 | 1    | 1   | 1   | 1    | 20  | 1    |     |
| 1194 | A0875       | 203 | 2          |               | 1 DEU   | 2004 | Hospitalized patient | Clin_Isol      | E. faecium | urine              | 1        | 1    |      |      | 203            | 15 | 1    | 1   | 1   | 1    | 20  | 1    |     |
| 1195 | A0876       | 203 | 2          |               | 1 DEU   | 2004 | Hospitalized patient | Clin_Isol      | E. faecium | urine              | 1        | 1    |      |      | 203            | 15 | 1    | 1   | 1   | 1    | 20  | 1    |     |
| 1196 | A0877       | 203 | 2          |               | 1 DEU   | 2004 | Hospitalized patient | Clin_Isol      | E. faecium | tracheal secret.   | 1        | 1    |      |      | 203            | 15 | 1    | 1   | 1   | 1    | 20  | 1    |     |
| 1197 | A0878       | 203 | 2          |               | 1 DEU   | 2004 | Hospitalized patient | Clin_Isol      | E. faecium | tracheal secret.   | 1        | 1    |      |      | 203            | 15 | 1    | 1   | 1   | 1    | 20  | 1    |     |

Supplementary Table 1. Meta-data of isolates included in this study

| No   | Strain code | ST  | BAPS group | BAPS subgroup | country | year | Source                  | Epidemiology   | Species    | isol_site         | esp_gene | ampR | SgrA | EcbA | Genomic island | ST  | AtpA | Ddl | Gdh | PurK | Gyd | PstS | Ack |   |
|------|-------------|-----|------------|---------------|---------|------|-------------------------|----------------|------------|-------------------|----------|------|------|------|----------------|-----|------|-----|-----|------|-----|------|-----|---|
| 1198 | A0879       | 203 | 2          |               | 1 DEU   | 2005 | Hospitalized patient    | Clin_Isol      | E. faecium | catheter urine    | 1        | 1    |      |      |                | 203 | 15   | 1   | 1   | 1    | 1   | 20   | 1   |   |
| 1199 | A1017       | 203 | 2          |               | 1 DEU   | 2004 | Hospitalized patient    | Hosp_Surv      | E. faecium | Perianal swab     | 1        | 1    |      |      |                | 203 | 15   | 1   | 1   | 1    | 1   | 20   | 1   |   |
| 1200 | A1020       | 203 | 2          |               | 1 DEU   | 2004 | Hospitalized patient    | Clin_Isol      | E. faecium | tracheal secret.  | 1        | 1    |      |      |                | 203 | 15   | 1   | 1   | 1    | 1   | 20   | 1   |   |
| 1201 | A1022       | 203 | 2          |               | 1 DEU   | 2004 | Hospitalized patient    | Clin_Isol      | E. faecium | urine             | 1        | 1    |      |      |                | 203 | 15   | 1   | 1   | 1    | 1   | 20   | 1   |   |
| 1202 | A1023       | 203 | 2          |               | 1 DEU   | 2004 | Hospitalized patient    | Clin_Isol      | E. faecium | tracheal secret.  | 1        | 1    |      |      |                | 203 | 15   | 1   | 1   | 1    | 1   | 20   | 1   |   |
| 1203 | A1025       | 203 | 2          |               | 1 DEU   | 2005 | Hospitalized patient    | Clin_Isol      | E. faecium | catheter urine    | 1        | 1    |      |      |                | 203 | 15   | 1   | 1   | 1    | 1   | 20   | 1   |   |
| 1204 | A1027       | 203 | 2          |               | 1 DEU   | 2005 | Hospitalized patient    |                | E. faecium |                   |          |      |      |      | 203            | 15  | 1    | 1   | 1   | 1    | 1   | 20   | 1   |   |
| 1205 | A1028       | 203 | 2          |               | 1 DEU   | 2005 | Hospitalized patient    |                | E. faecium |                   |          |      |      |      | 203            | 15  | 1    | 1   | 1   | 1    | 1   | 20   | 1   |   |
| 1206 | A1033       | 203 | 2          |               | 1 DEU   | 2005 | Hospitalized patient    |                | E. faecium |                   |          |      |      |      | 203            | 15  | 1    | 1   | 1   | 1    | 1   | 20   | 1   |   |
| 1207 | A1381       | 203 | 2          |               | 1 CHN   | 2005 | Hospitalized patient    | Clin_Isol      | E. faecium | Urine             | 1        | 1    |      |      |                | 203 | 15   | 1   | 1   | 1    | 1   | 20   | 1   |   |
| 1208 | A1383       | 203 | 2          |               | 1 CHN   | 2005 | Hospitalized patient    | Clin_Isol      | E. faecium | Sputum            | 1        | 1    |      |      |                | 203 | 15   | 1   | 1   | 1    | 1   | 20   | 1   |   |
| 1209 | A1384       | 203 | 2          |               | 1 CHN   | 2005 | Hospitalized patient    | Clin_Isol      | E. faecium | Urine             | 1        | 1    |      |      |                | 203 | 15   | 1   | 1   | 1    | 1   | 20   | 1   |   |
| 1210 | A1544       | 203 | 2          |               | 1 DEU   | 2004 | Hospitalized patient    | Clin_Isol      | E. faecium | blood             | 0        | 1    |      |      |                | 203 | 15   | 1   | 1   | 1    | 1   | 20   | 1   |   |
| 1211 | A1558       | 203 | 2          |               | 1 DEU   | 2005 | Hospitalized patient    | Clin_Isol      | E. faecium | blood             | 1        | 1    |      |      |                | 203 | 15   | 1   | 1   | 1    | 1   | 20   | 1   |   |
| 1212 | A1584       | 203 | 2          |               | 1 DEU   | 2006 | Hospitalized patient    | Clin_Isol      | E. faecium | blood             | 1        | 1    |      |      |                | 203 | 15   | 1   | 1   | 1    | 1   | 20   | 1   |   |
| 1213 | A1603       | 203 | 2          |               | 1 DEU   | 2006 | Hospitalized patient    | Clin_Isol      | E. faecium | blood             | 1        | 1    |      |      |                | 203 | 15   | 1   | 1   | 1    | 1   | 20   | 1   |   |
| 1214 | A1618       | 203 | 2          |               | 1 CHN   | 2007 | Hospitalized patient    |                | E. faecium |                   |          |      |      |      | 203            | 15  | 1    | 1   | 1   | 1    | 1   | 20   | 1   |   |
| 1215 | A1622       | 203 | 2          |               | 1 CHN   | 2006 | Hospitalized patient    |                | E. faecium |                   |          |      |      |      | 203            | 15  | 1    | 1   | 1   | 1    | 1   | 20   | 1   |   |
| 1216 | A1625       | 203 | 2          |               | 1 CHN   | 2007 | Hospitalized patient    |                | E. faecium |                   |          |      |      |      | 203            | 15  | 1    | 1   | 1   | 1    | 1   | 20   | 1   |   |
| 1217 | A1626       | 203 | 2          |               | 1 CHN   | 2007 | Hospitalized patient    |                | E. faecium |                   |          |      |      |      | 203            | 15  | 1    | 1   | 1   | 1    | 1   | 20   | 1   |   |
| 1218 | A1627       | 203 | 2          |               | 1 CHN   | 2007 | Hospitalized patient    |                | E. faecium |                   |          |      |      |      | 203            | 15  | 1    | 1   | 1   | 1    | 1   | 20   | 1   |   |
| 1219 | A1733       | 203 | 2          |               | 1 JPN   | 2006 | Hospitalized patient    | Clin_Isol      | E. faecium | Bile              |          |      |      |      |                | 203 | 15   | 1   | 1   | 1    | 1   | 20   | 1   |   |
| 1220 | A1734       | 203 | 2          |               | 1 JPN   | 2006 | Hospitalized patient    | Clin_Isol      | E. faecium | Wound             |          |      |      |      |                | 203 | 15   | 1   | 1   | 1    | 1   | 20   | 1   |   |
| 1221 | A1774       | 203 | 2          |               | 1 AUS   | 2008 | Hospitalized patient    | Clin_Isol      | E. faecium | Urine             |          | 1    |      |      |                | 203 | 15   | 1   | 1   | 1    | 1   | 20   | 1   |   |
| 1222 | E4567       | 203 | 2          |               | 1 NLD   |      | Non-hospitalized person | Comm_Surv      | E. faecium | Faeces            |          | 1    |      |      |                | 203 | 15   | 1   | 1   | 1    | 1   | 20   | 1   |   |
| 1223 | A0075       | 204 | 2          |               | 1 KOR   | 1998 | Hospitalized patient    | Clin_Isol      | E. faecium | Others            | 1        |      |      |      |                | 204 | 15   | 1   | 6   | 1    | 1   | 1    | 1   |   |
| 1224 | A0081       | 204 | 2          |               | 1 KOR   | 1999 | Hospitalized patient    | Clin_Isol      | E. faecium | Pus               | 1        |      |      |      |                | 204 | 15   | 1   | 6   | 1    | 1   | 1    | 1   |   |
| 1225 | A0177       | 204 | 2          |               | 1 KOR   | 2000 | Hospitalized patient    | Clin_Isol      | E. faecium |                   |          |      |      |      |                | 204 | 15   | 1   | 6   | 1    | 1   | 1    | 1   |   |
| 1226 | A1385       | 204 | 2          |               | 1 CHN   | 2006 | Hospitalized patient    | Clin_Isol      | E. faecium | Blood             | 0        | 1    |      |      |                | 204 | 15   | 1   | 6   | 1    | 1   | 1    | 1   |   |
| 1227 | A1390       | 204 | 2          |               | 1 CHN   | 2007 | Hospitalized patient    | Clin_Isol      | E. faecium | Drain             | 1        | 1    |      |      |                | 204 | 15   | 1   | 6   | 1    | 1   | 1    | 1   |   |
| 1228 | A1395       | 204 | 2          |               | 1 CHN   | 2007 | Hospitalized patient    | Clin_Isol      | E. faecium | Blood             | 1        | 1    |      |      |                | 204 | 15   | 1   | 6   | 1    | 1   | 1    | 1   |   |
| 1229 | A0080       | 205 | 3          |               | 3 KOR   | 1999 | Hospitalized patient    | Clin_Isol      | E. faecium | Others            | 1        |      |      |      |                | 205 | 3    | 1   | 1   | 1    | 1   | 1    | 1   |   |
| 1230 | A0186       | 205 | 3          |               | 3 KOR   | 2003 | Hospitalized patient    | Clin_Isol      | E. faecium | Urine             | 1        |      |      |      |                | 205 | 3    | 1   | 1   | 1    | 1   | 1    | 1   |   |
| 1231 | A0104       | 206 | 3          |               | 1 KOR   | 2002 | Hospitalized patient    | Clin_Isol      | E. faecium | Blood,peripheral  | 1        |      |      |      |                | 206 | 1    | 3   | 1   | 1    | 1   | 1    | 7   |   |
| 1232 | A0138       | 207 | 3          |               | 3 KOR   | 2003 | Hospitalized patient    | Clin_Isol      | E. faecium | Bile              | 1        |      |      |      |                | 207 | 3    | 1   | 1   | 1    | 1   | 1    | 20  | 1 |
| 1233 | A0150       | 208 | 3          |               | 3 DEU   | 2004 | Hospitalized patient    | Clin_Isol      | E. faecium | Punctate drainage | 1        | 1    |      |      |                | 208 | 33   | 2   | 1   | 1    | 1   | 1    | 1   |   |
| 1234 | A0155       | 209 | 3          |               | 3 ITA   | 2002 | Hospitalized patient    | Clin_Isol      | E. faecium | Blood             | 1        | 1    |      |      |                | 209 | 37   | 1   | 1   | 1    | 1   | 1    | 1   |   |
| 1235 | E1904       | 210 | 2          |               | 3 NLD   | 2001 | Hospitalized patient    | Clin_Isol      | E. faecium | Urine             | 0        | 1    |      |      |                | 210 | 9    | 3   | 1   | 1    | 1   | 1    | 3   |   |
| 1236 | A0160       | 211 | 1          |               | BRA     |      | Non-hospitalized person |                | E. faecium |                   |          |      |      |      |                | 211 | 5    | 13  | 18  | 17   | 17  | 19   | 6   |   |
| 1237 | A0161       | 212 | 2          |               | 3 BRA   |      | Non-hospitalized person | Comm_Surv      | E. faecium |                   |          |      |      |      |                | 212 | 15   | 7   | 5   | 7    | 1   | 1    | 1   |   |
| 1238 | A0162       | 213 | 1          |               | BRA     |      | Non-hospitalized person | Comm_Surv      | E. faecium |                   |          |      |      |      |                | 213 | 13   | 8   | 8   | 8    | 6   | 27   | 11  |   |
| 1239 | A0166       | 213 | 1          |               | BRA     |      | Non-hospitalized person | Comm_Surv      | E. faecium |                   |          |      |      |      |                | 213 | 13   | 8   | 8   | 8    | 6   | 27   | 11  |   |
| 1240 | A0163       | 214 | 3          |               | 1 BRA   |      | Non-hospitalized person | Comm_Surv      | E. faecium |                   |          |      |      |      |                | 214 | 2    | 3   | 2   | 2    | 1   | 1    | 1   |   |
| 1241 | A0164       | 215 | 3          |               | 3 BRA   |      | Non-hospitalized person | Comm_Surv      | E. faecium |                   |          |      |      |      |                | 215 | 3    | 7   | 3   | 6    | 1   | 1    | 1   |   |
| 1242 | A0165       | 216 | 2          |               | 3 BRA   |      | Non-hospitalized person | Comm_Surv      | E. faecium |                   |          |      |      |      |                | 216 | 15   | 4   | 12  | 6    | 1   | 1    | 5   |   |
| 1243 | A0167       | 217 | 2          |               | 1 BRA   |      | Pig                     | Animal_pig     | E. faecium | Faeces            |          |      |      |      |                | 217 | 21   | 2   | 12  | 9    | 1   | 1    | 5   |   |
| 1244 | A0168       | 218 | 1          |               | BRA     |      | Pig                     | Animal_pig     | E. faecium | Faeces            |          |      |      |      |                | 218 | 13   | 8   | 8   | 23   | 6   | 10   | 11  |   |
| 1245 | A0169       | 219 | 2          |               | 4 BRA   |      | Pig                     | Animal_pig     | E. faecium | Faeces            |          |      |      |      |                | 219 | 25   | 3   | 1   | 2    | 10  | 10   | 1   |   |
| 1246 | A0151       | 220 | 2          |               | 3 BRA   |      |                         |                | E. faecium |                   |          |      |      |      |                | 220 | 35   | 3   | 25  | 2    | 1   | 1    | 1   |   |
| 1247 | A0152       | 221 | 1          |               | BRA     |      | Pig                     | Animal_pig     | E. faecium | Faeces            |          |      |      |      |                | 221 | 5    | 13  | 26  | 7    | 10  | 6    | 6   |   |
| 1248 | A0153       | 222 | 1          |               | BRA     |      | Pig                     | Animal_pig     | E. faecium | Faeces            |          |      |      |      |                | 222 | 36   | 8   | 10  | 8    | 20  | 9    | 6   |   |
| 1249 | A0154       | 223 | 1          |               | BRA     |      | Pig                     | Animal_pig     | E. faecium | Faeces            |          |      |      |      |                | 223 | 10   | 20  | 9   | 17   | 17  | 19   | 6   |   |
| 1250 | A0156       | 224 | 1          |               | BRA     |      |                         |                | E. faecium |                   |          |      |      |      |                | 224 | 36   | 13  | 18  | 17   | 10  | 41   | 14  |   |
| 1251 | A0157       | 225 | 1          |               | BRA     |      |                         |                | E. faecium |                   |          |      |      |      |                | 225 | 13   | 21  | 8   | 17   | 10  | 27   | 6   |   |
| 1252 | A0170       | 226 | 1          |               | BRA     |      | Pig                     | Animal_pig     | E. faecium | Faeces            |          |      |      |      |                | 226 | 5    | 13  | 26  | 17   | 10  | 26   | 6   |   |
| 1253 | E1849       | 227 | 2          |               | 1 ESP   | 2001 | Hospitalized patient    | Hosp_Surv      | E. faecium | Faeces            |          | 1    |      |      |                | 227 | 35   | 1   | 1   | 1    | 5   | 1    | 1   |   |
| 1254 | E1851       | 228 | 3          |               | 5 ESP   | 2001 | Hospitalized patient    | Hosp_Surv      | E. faecium | Faeces            |          | 0    |      |      |                | 228 | 34   | 2   | 25  | 6    | 1   | 11   | 1   |   |
| 1255 | A0172       | 229 | 1          |               | BRA     |      | Pig                     | Animal_pig     | E. faecium | Faeces            |          |      |      |      |                | 229 | 11   | 8   | 10  | 8    | 20  | 9    | 6   |   |
| 1256 | A0176       | 230 | 2          |               | 1 KOR   | 2003 | Hospitalized patient    | Clin_Isol      | E. faecium | Urine             | 1        |      |      |      |                | 230 | 15   | 1   | 1   | 1    | 12  | 1    | 1   |   |
| 1257 | A0178       | 231 | 2          |               | 1 KOR   | 2000 | Poultry                 | Animal_poultry | E. faecium | Faeces            | 1        |      |      |      |                | 231 | 15   | 1   | 24  | 6    | 1   | 1    | 1   |   |
| 1258 | A0179       | 232 | 2          |               | 1 KOR   | 2000 | Poultry                 | Animal_poultry | E. faecium | Faeces            | 1        |      |      |      |                | 232 | 15   | 2   | 24  | 6    | 1   | 1    | 1   |   |
| 1259 | A0180       | 233 | 3          |               | 3 KOR   | 2000 | Hospitalized patient    | Clin_Isol      | E. faecium |                   | 1        |      |      |      |                | 233 | 1    | 1   | 1   | 1    | 1   | 20   | 1   |   |
| 1260 | A0188       | 233 | 3          |               | 3 DEU   | 2001 | Hospitalized patient    | Hosp_Surv      | E. faecium |                   |          |      |      |      |                | 233 | 1    | 1   | 1   | 1    | 1   | 20   | 1   |   |

Supplementary Table 1. Meta-data of isolates included in this study

| No   | Strain code | ST  | BAPS group | BAPS subgroup | country | year | Source                  | Epidemiology   | Species    | isol_site           | esp_gene | ampR | SgrA | EcbA | Genomic island | ST | AtpA | Ddl | Gdh | PurK | Gyd | PstS | Ack |
|------|-------------|-----|------------|---------------|---------|------|-------------------------|----------------|------------|---------------------|----------|------|------|------|----------------|----|------|-----|-----|------|-----|------|-----|
| 1261 | A0181       | 234 | 3          | 3             | KOR     | 2000 | Hospitalized patient    | Clin_Isol      | E. faecium |                     | 1        |      |      |      | 234            | 1  | 1    | 6   | 1   | 1    | 1   | 1    | 1   |
| 1262 | A0182       | 235 | 2          | 1             | KOR     | 2003 | Hospitalized patient    | Clin_Isol      | E. faecium | Urine               | 1        |      |      |      | 235            | 9  | 1    | 1   | 1   | 1    | 1   | 1    | 7   |
| 1263 | A0184       | 236 | 2          | 1             | KOR     | 2000 | Poultry                 | Animal_poultry | E. faecium | Faeces              | 1        |      |      |      | 236            | 9  | 2    | 6   | 6   | 1    | 1   | 1    | 1   |
| 1264 | A1657       | 236 | 2          | 1             | PRT     | 1999 | Poultry                 | Animal_Poultry | E. faecium | Carcass             | 0        | 0    |      |      | 236            | 9  | 2    | 6   | 6   | 1    | 1   | 1    | 1   |
| 1265 | A1743       | 236 | 2          | 1             | USA     | 2005 |                         |                | E. faecium |                     |          |      |      |      | 236            | 9  | 2    | 6   | 6   | 1    | 1   | 1    | 1   |
| 1266 | A0185       | 237 | 2          | 1             | KOR     | 2000 | Poultry                 | Animal_poultry | E. faecium | Faeces              | 1        |      |      |      | 237            | 5  | 2    | 24  | 14  | 1    | 7   | 1    | 1   |
| 1267 | A0187       | 238 | 3          | 3             | KOR     | 2000 | Poultry                 | Animal_poultry | E. faecium | Faeces              | 1        |      |      |      | 238            | 2  | 2    | 6   | 6   | 1    | 7   | 1    | 1   |
| 1268 | A0241       | 239 | 1          |               | NLD     |      |                         |                | E. faecium |                     |          |      |      |      | 239            | 36 | 13   | 18  | 17  | 10   | 41  | 6    | 6   |
| 1269 | A0242       | 239 | 1          |               | NLD     |      |                         |                | E. faecium |                     |          |      |      |      | 239            | 36 | 13   | 18  | 17  | 10   | 41  | 6    | 6   |
| 1270 | A0245       | 240 | 1          |               | NLD     |      |                         |                | E. faecium |                     |          |      |      |      | 240            | 25 | 13   | 9   | 33  | 10   | 19  | 6    | 6   |
| 1271 | A0249       | 241 | 2          | 1             | NOR     | 1999 | Poultry                 | Animal_Poultry | E. faecium | Faeces              |          |      |      |      | 241            | 9  | 2    | 13  | 6   | 1    | 7   | 1    | 1   |
| 1272 | A0254       | 241 | 2          | 1             | NOR     | 1998 | Poultry                 | Animal_Poultry | E. faecium | Faeces              |          |      |      |      | 241            | 9  | 2    | 13  | 6   | 1    | 7   | 1    | 1   |
| 1273 | A0250       | 242 | 2          | 1             | NOR     | 1998 | Poultry farmer          | Comm_Surv      | E. faecium | Faeces              |          |      |      |      | 242            | 9  | 2    | 7   | 6   | 1    | 16  | 1    | 1   |
| 1274 | A0259       | 242 | 2          | 1             | NOR     | 1998 | Poultry                 | Animal_Poultry | E. faecium | Faeces              |          |      |      |      | 242            | 9  | 2    | 7   | 6   | 1    | 16  | 1    | 1   |
| 1275 | A0253       | 243 | 2          | 1             | NOR     | 1999 | Poultry farmer          | Comm_Surv      | E. faecium | Faeces              |          |      |      |      | 243            | 9  | 2    | 7   | 6   | 7    | 1   | 1    | 1   |
| 1276 | A0255       | 244 | 2          | 3             | NOR     | 1999 | Poultry                 | Animal_Poultry | E. faecium | Faeces              |          |      |      |      | 244            | 5  | 3    | 1   | 32  | 1    | 7   | 1    | 1   |
| 1277 | A0256       | 245 | 2          | 1             | NOR     | 1999 | Poultry                 | Animal_Poultry | E. faecium | Faeces              |          |      |      |      | 245            | 9  | 2    | 1   | 6   | 1    | 36  | 1    | 1   |
| 1278 | A0257       | 246 | 2          | 1             | NOR     | 1999 | Poultry farmer          | Comm_Surv      | E. faecium | Faeces              |          |      |      |      | 246            | 9  | 2    | 1   | 6   | 1    | 20  | 1    | 1   |
| 1279 | A0258       | 247 | 2          | 3             | NOR     | 1999 | Poultry farmer          | Comm_Surv      | E. faecium | Faeces              |          |      |      |      | 247            | 38 | 4    | 12  | 9   | 2    | 1   | 15   | 1   |
| 1280 | A0260       | 248 | 2          | 1             | NOR     | 1999 | Poultry                 | Animal_Poultry | E. faecium | Faeces              |          |      |      |      | 248            | 5  | 2    | 13  | 6   | 1    | 7   | 1    | 1   |
| 1281 | A0262       | 249 | 2          | 1             | ITA     |      | Hospitalized patient    |                | E. faecium |                     |          |      |      |      | 249            | 15 | 1    | 27  | 1   | 1    | 1   | 1    | 1   |
| 1282 | A1107       | 249 | 2          | 1             | ITA     | 2005 | Hospitalized patient    | Clin_isol      | E. faecium | Bile                | 1        | 1    |      |      | 249            | 15 | 1    | 27  | 1   | 1    | 1   | 1    | 1   |
| 1283 | A1113       | 249 | 2          | 1             | ITA     | 2005 | Hospitalized patient    | Clin_isol      | E. faecium | Bronchoalveolar lav | 1        | 1    |      |      | 249            | 15 | 1    | 27  | 1   | 1    | 1   | 1    | 1   |
| 1284 | A1128       | 249 | 2          | 1             | ITA     | 2005 | Hospitalized patient    | Clin_isol      | E. faecium | Urine               | 1        | 1    |      |      | 249            | 15 | 1    | 27  | 1   | 1    | 1   | 1    | 1   |
| 1285 | A1136       | 249 | 2          | 1             | ITA     | 2005 | Hospitalized patient    | Clin_isol      | E. faecium | Urine               | 1        | 1    |      |      | 249            | 15 | 1    | 27  | 1   | 1    | 1   | 1    | 1   |
| 1286 | A0264       | 250 | 3          | 3             | KOR     | 2000 | Poultry                 | Animal_Poultry | E. faecium | Faeces              | 1        |      |      |      | 250            | 3  | 2    | 7   | 34  | 1    | 1   | 1    | 1   |
| 1287 | A0265       | 251 | 2          | 1             | KOR     | 2000 | Poultry                 | Animal_poultry | E. faecium | Faeces              | 1        |      |      |      | 251            | 9  | 2    | 1   | 34  | 1    | 1   | 1    | 1   |
| 1288 | A0295       | 252 | 3          | 3             | ITA     |      |                         |                | E. faecium |                     |          |      |      |      | 252            | 1  | 5    | 1   | 1   | 1    | 1   | 1    | 1   |
| 1289 | A1165       | 252 | 3          | 3             | ITA     | 2005 | Hospitalized patient    | Clin_isol      | E. faecium | Blood               | 1        | 1    |      |      | 252            | 1  | 5    | 1   | 1   | 1    | 1   | 1    | 1   |
| 1290 | A1498       | 252 | 3          | 3             | DEU     | 1995 | Hospitalized patient    | Clin_Isol      | E. faecium | blood               | 1        | 1    |      |      | 252            | 1  | 5    | 1   | 1   | 1    | 1   | 1    | 1   |
| 1291 | A1551       | 252 | 3          | 3             | DEU     | 2004 | Hospitalized patient    | Clin_Isol      | E. faecium | blood               | 0        | 1    |      |      | 252            | 1  | 5    | 1   | 1   | 1    | 1   | 1    | 1   |
| 1292 | E1908       | 253 | 3          | 3             | NLD     | 2002 | Hospitalized patient    | Clin_Isol      | E. faecium | Blood               | 0        | 1    |      |      | 253            | 3  | 7    | 3   | 35  | 1    | 1   | 1    | 1   |
| 1293 | E2064       | 254 | 2          | 1             | DNK     | 2001 | Pig                     | Animal_pig     | E. faecium |                     | 0        |      |      |      | 254            | 39 | 2    | 12  | 9   | 1    | 20  | 5    | 5   |
| 1294 | E2077       | 255 | 3          | 2             | DNK     | 2001 | Pig                     | Animal_pig     | E. faecium |                     | 0        |      |      |      | 255            | 4  | 2    | 1   | 9   | 1    | 20  | 5    | 5   |
| 1295 | E2078       | 256 | 2          | 1             | DNK     | 2001 | Pig                     | Animal_pig     | E. faecium |                     | 0        |      |      |      | 256            | 28 | 2    | 12  | 9   | 2    | 20  | 5    | 5   |
| 1296 | E2070       | 257 | 3          | 1             | DNK     | 2001 | Pig                     | Animal_pig     | E. faecium |                     | 0        |      |      |      | 257            | 3  | 3    | 1   | 2   | 1    | 1   | 16   | 1   |
| 1297 | E2090       | 257 | 3          | 1             | DNK     | 2001 | Pig                     | Animal_pig     | E. faecium |                     | 0        |      |      |      | 257            | 3  | 3    | 1   | 2   | 1    | 1   | 16   | 1   |
| 1298 | E2101       | 258 | 3          | 5             | DNK     | 2001 | Poultry                 | Animal_Poultry | E. faecium |                     | 0        |      |      |      | 258            | 2  | 23   | 1   | 6   | 1    | 42  | 1    | 1   |
| 1299 | E2103       | 258 | 3          | 5             | DNK     | 2001 | Poultry                 | Animal_Poultry | E. faecium |                     | 0        |      |      |      | 258            | 2  | 23   | 1   | 6   | 1    | 42  | 1    | 1   |
| 1300 | E2135       | 259 | 2          | 1             | NLD     | 2004 | Poultry                 | Animal_Poultry | E. faecium |                     | 1        |      |      |      | 259            | 5  | 2    | 24  | 6   | 1    | 16  | 1    | 1   |
| 1301 | U0086       | 260 | 3          | 3             | NLD     | 2004 | Hospitalized patient    | Hosp_Surv      | E. faecium | Faeces              | 0        | 1    |      |      | 260            | 7  | 1    | 1   | 1   | 12   | 7   | 1    | 1   |
| 1302 | U0098       | 261 | 2          | 3             | NLD     | 2004 | Hospitalized patient    | Hosp_Surv      | E. faecium | Faeces              | 0        | 1    |      |      | 261            | 5  | 12   | 1   | 1   | 1    | 7   | 1    | 1   |
| 1303 | A2073       | 262 | 3          | 3             | RUS     | 2006 | Hospitalized patient    | Hosp_Surv      | E. faecium | Faeces              | 1        | 1    |      |      | 262            | 7  | 1    | 1   | 1   | 5    | 7   | 1    | 1   |
| 1304 | A2074       | 262 | 3          | 3             | RUS     | 2006 | Hospitalized patient    | Hosp_Surv      | E. faecium | Faeces              | 1        | 1    |      |      | 262            | 7  | 1    | 1   | 1   | 5    | 7   | 1    | 1   |
| 1305 | U0119       | 262 | 3          | 3             | NLD     | 2004 | Hospitalized patient    | Hosp_Surv      | E. faecium | Faeces              | 0        | 1    |      |      | 262            | 7  | 1    | 1   | 1   | 5    | 7   | 1    | 1   |
| 1306 | U0122       | 262 | 3          | 3             | NLD     | 2004 | Hospitalized patient    | Hosp_Surv      | E. faecium | Faeces              | 0        | 1    |      |      | 262            | 7  | 1    | 1   | 1   | 5    | 7   | 1    | 1   |
| 1307 | U0134       | 262 | 3          | 3             | NLD     | 2004 | Hospitalized patient    | Hosp_Surv      | E. faecium | Faeces              | 0        | 1    |      |      | 262            | 7  | 1    | 1   | 1   | 5    | 7   | 1    | 1   |
| 1308 | U0135       | 262 | 3          | 3             | NLD     | 2004 | Hospitalized patient    | Hosp_Surv      | E. faecium | Faeces              | 0        | 1    |      |      | 262            | 7  | 1    | 1   | 1   | 5    | 7   | 1    | 1   |
| 1309 | U0137       | 262 | 3          | 3             | NLD     | 2004 | Hospitalized patient    | Hosp_Surv      | E. faecium | Faeces              | 0        | 1    |      |      | 262            | 7  | 1    | 1   | 1   | 5    | 7   | 1    | 1   |
| 1310 | U0146       | 262 | 3          | 3             | NLD     | 2004 | Hospitalized patient    | Hosp_Surv      | E. faecium | Faeces              | 0        | 1    |      |      | 262            | 7  | 1    | 1   | 1   | 5    | 7   | 1    | 1   |
| 1311 | U0152       | 262 | 3          | 3             | NLD     | 2004 | Hospitalized patient    | Hosp_Surv      | E. faecium | Faeces              | 0        | 1    |      |      | 262            | 7  | 1    | 1   | 1   | 5    | 7   | 1    | 1   |
| 1312 | U0157       | 262 | 3          | 3             | NLD     | 2004 | Hospitalized patient    | Hosp_Surv      | E. faecium | Faeces              | 0        | 1    |      |      | 262            | 7  | 1    | 1   | 1   | 5    | 7   | 1    | 1   |
| 1313 | U0160       | 262 | 3          | 3             | NLD     | 2004 | Hospitalized patient    | Hosp_Surv      | E. faecium | Faeces              | 0        | 1    |      |      | 262            | 7  | 1    | 1   | 1   | 5    | 7   | 1    | 1   |
| 1314 | U0163       | 262 | 3          | 3             | NLD     | 2004 | Hospitalized patient    | Hosp_Surv      | E. faecium | Faeces              | 0        | 1    |      |      | 262            | 7  | 1    | 1   | 1   | 5    | 7   | 1    | 1   |
| 1315 | U0167       | 262 | 3          | 3             | NLD     | 2004 | Hospitalized patient    | Hosp_Surv      | E. faecium | Faeces              | 0        | 1    |      |      | 262            | 7  | 1    | 1   | 1   | 5    | 7   | 1    | 1   |
| 1316 | U0173       | 262 | 3          | 3             | NLD     | 2004 | Hospitalized patient    | Hosp_Surv      | E. faecium | Faeces              | 0        | 1    |      |      | 262            | 7  | 1    | 1   | 1   | 5    | 7   | 1    | 1   |
| 1317 | U0237       | 262 | 3          | 3             | NLD     | 2004 | Hospitalized patient    | Hosp_Surv      | E. faecium | Faeces              | 0        | 1    |      |      | 262            | 7  | 1    | 1   | 1   | 5    | 7   | 1    | 1   |
| 1318 | U0238       | 262 | 3          | 3             | NLD     | 2004 | Hospitalized patient    | Hosp_Surv      | E. faecium | Faeces              | 0        | 1    |      |      | 262            | 7  | 1    | 1   | 1   | 5    | 7   | 1    | 1   |
| 1319 | U0158       | 263 | 3          | 1             | NLD     | 2004 | Hospitalized patient    | Hosp_Surv      | E. faecium | Faeces              | 0        | 1    |      |      | 263            | 2  | 3    | 1   | 6   | 1    | 1   | 1    | 1   |
| 1320 | E4593       | 264 | 2          | 3             | NLD     | 2009 | Cat                     | Animal_Cat     | E. faecium | Faeces              | 0        | 1    |      |      | 264            | 5  | 4    | 6   | 6   | 2    | 1   | 8    | 1   |
| 1321 | U0172       | 264 | 2          | 3             | NLD     | 2004 | Hospitalized patient    | Hosp_Surv      | E. faecium | Faeces              | 0        | 1    |      |      | 264            | 5  | 4    | 6   | 6   | 2    | 1   | 8    | 1   |
| 1322 | U0196       | 265 | 2          | 3             | NLD     | 2004 | Non-hospitalized person | Comm_Surv      | E. faecium | Faeces              | 0        | 1    |      |      | 265            | 9  | 4    | 1   | 6   | 21   | 20  | 5    | 5   |
| 1323 | E4404       | 266 | 2          | 1             | DNK     |      | Dog                     | Animal_Dog     | E. faecium | Faeces              | 0        | 1    |      |      | 266            | 15 | 1    | 6   | 6   | 1    | 7   | 1    | 1   |

Supplementary Table 1. Meta-data of isolates included in this study

| No   | Strain code  | ST  | BAPS group | BAPS subgroup | country | year    | Source                  | Epidemiology   | Species    | isol_site          | esp_gene | ampR | SgrA | EcbA | Genomic island | ST  | AtpA | Ddl | Gdh | PurK | Gyd | PstS | Ack |
|------|--------------|-----|------------|---------------|---------|---------|-------------------------|----------------|------------|--------------------|----------|------|------|------|----------------|-----|------|-----|-----|------|-----|------|-----|
| 1324 | E4411        | 266 | 2          |               | 1 GBR   |         | Dog                     | Animal_Dog     | E. faecium | Faeces             | 0        | 1    |      |      |                | 266 | 15   | 1   | 6   | 6    | 1   | 7    | 1   |
| 1325 | E4417        | 266 | 2          |               | 1 GBR   |         | Dog                     | Animal_Dog     | E. faecium | Faeces             | 0        | 1    |      |      |                | 266 | 15   | 1   | 6   | 6    | 1   | 7    | 1   |
| 1326 | E4425        | 266 | 2          |               | 1 GBR   |         | Dog                     | Animal_Dog     | E. faecium | Faeces             | 0        | 1    |      |      |                | 266 | 15   | 1   | 6   | 6    | 1   | 7    | 1   |
| 1327 | E4432        | 266 | 2          |               | 1 GBR   |         | Dog                     | Animal_Dog     | E. faecium | Faeces             | 0        | 1    |      |      |                | 266 | 15   | 1   | 6   | 6    | 1   | 7    | 1   |
| 1328 | E4435        | 266 | 2          |               | 1 GBR   |         | Dog                     | Animal_Dog     | E. faecium | Faeces             | 0        | 1    |      |      |                | 266 | 15   | 1   | 6   | 6    | 1   | 7    | 1   |
| 1329 | E4436        | 266 | 2          |               | 1 GBR   |         | Dog                     | Animal_Dog     | E. faecium | Faeces             | 0        | 1    |      |      |                | 266 | 15   | 1   | 6   | 6    | 1   | 7    | 1   |
| 1330 | E4439        | 266 | 2          |               | 1 GBR   |         | Dog                     | Animal_Dog     | E. faecium | Faeces             | 0        | 1    |      |      |                | 266 | 15   | 1   | 6   | 6    | 1   | 7    | 1   |
| 1331 | E4446        | 266 | 2          |               | 1 GBR   |         | Dog                     | Animal_Dog     | E. faecium | Faeces             | 0        | 1    |      |      |                | 266 | 15   | 1   | 6   | 6    | 1   | 7    | 1   |
| 1332 | E4447        | 266 | 2          |               | 1 GBR   |         | Dog                     | Animal_Dog     | E. faecium | Faeces             | 0        | 1    |      |      |                | 266 | 15   | 1   | 6   | 6    | 1   | 7    | 1   |
| 1333 | E4452        | 266 | 2          |               | 1 NLD   | 2008    | Dog                     | Animal_Dog     | E. faecium | Faeces             | 1        | 1    |      |      |                | 266 | 15   | 1   | 6   | 6    | 1   | 7    | 1   |
| 1334 | E4460        | 266 | 2          |               | 1 NLD   | 2008    | Dog                     | Animal_Dog     | E. faecium | Faeces             | 1        | 1    |      |      |                | 266 | 15   | 1   | 6   | 6    | 1   | 7    | 1   |
| 1335 | E4467        | 266 | 2          |               | 1 NLD   | 2008    | Dog                     | Animal_Dog     | E. faecium | Faeces             | 1        | 1    |      |      |                | 266 | 15   | 1   | 6   | 6    | 1   | 7    | 1   |
| 1336 | E4474        | 266 | 2          |               | 1 NLD   | 2008    | Dog                     | Animal_Dog     | E. faecium | Faeces             | 1        | 1    |      |      |                | 266 | 15   | 1   | 6   | 6    | 1   | 7    | 1   |
| 1337 | E4535        | 266 | 2          |               | 1 NLD   |         | Non-hospitalized person | Comm_Surv      | E. faecium | Faeces             | 1        | 1    |      |      |                | 266 | 15   | 1   | 6   | 6    | 1   | 7    | 1   |
| 1338 | E4538        | 266 | 2          |               | 1 NLD   |         | Non-hospitalized person | Comm_Surv      | E. faecium | Faeces             | 1        | 1    |      |      |                | 266 | 15   | 1   | 6   | 6    | 1   | 7    | 1   |
| 1339 | E4544        | 266 | 2          |               | 1 NLD   |         | Non-hospitalized person | Comm_Surv      | E. faecium | Faeces             | 1        | 1    |      |      |                | 266 | 15   | 1   | 6   | 6    | 1   | 7    | 1   |
| 1340 | E4564        | 266 | 2          |               | 1 NLD   | 2008    | Dog                     | Animal_Dog     | E. faecium | Faeces             | 1        | 1    |      |      |                | 266 | 15   | 1   | 6   | 6    | 1   | 7    | 1   |
| 1341 | E4565        | 266 | 2          |               | 1 NLD   | 2008    | Dog                     | Animal_Dog     | E. faecium | Faeces             | 1        | 1    |      |      |                | 266 | 15   | 1   | 6   | 6    | 1   | 7    | 1   |
| 1342 | E4568        | 266 | 2          |               | 1 NLD   | 2008    | Cat                     | Animal_Cat     | E. faecium | Faeces             | 1        | 1    |      |      |                | 266 | 15   | 1   | 6   | 6    | 1   | 7    | 1   |
| 1343 | E4580        | 266 | 2          |               | 1 NLD   | 2009    | Cat                     | Animal_Cat     | E. faecium | Faeces             | 0        | 1    |      |      |                | 266 | 15   | 1   | 6   | 6    | 1   | 7    | 1   |
| 1344 | E4581        | 266 | 2          |               | 1 NLD   | 2009    | Cat                     | Animal_Cat     | E. faecium | Faeces             | 0        | 1    |      |      |                | 266 | 15   | 1   | 6   | 6    | 1   | 7    | 1   |
| 1345 | E4583        | 266 | 2          |               | 1 NLD   | 2009    | Cat                     | Animal_Cat     | E. faecium | Faeces             | 0        | 1    |      |      |                | 266 | 15   | 1   | 6   | 6    | 1   | 7    | 1   |
| 1346 | E4590        | 266 | 2          |               | 1 NLD   | 2009    | Cat                     | Animal_Cat     | E. faecium | Faeces             | 0        | 1    |      |      |                | 266 | 15   | 1   | 6   | 6    | 1   | 7    | 1   |
| 1347 | E4594        | 266 | 2          |               | 1 NLD   | 2009    | Cat                     | Animal_Cat     | E. faecium | Faeces             | 0        | 1    |      |      |                | 266 | 15   | 1   | 6   | 6    | 1   | 7    | 1   |
| 1348 | U0024        | 266 | 2          |               | 1 NLD   | 2001    | Hospitalized patient    | Clin_Isol      | E. faecium | Peritoneal fluid   | 0        | 1    |      |      |                | 266 | 15   | 1   | 6   | 6    | 1   | 7    | 1   |
| 1349 | U0274        | 266 | 2          |               | 1 NLD   | 2004    | Hospitalized patient    | Clin_Isol      | E. faecium | Urine              | 0        | 1    |      |      |                | 266 | 15   | 1   | 6   | 6    | 1   | 7    | 1   |
| 1350 | U0105        | 267 | 3          |               | 3 NLD   | 2004    | Hospitalized patient    | Clin_Isol      | E. faecium | Blood              | 1        | 1    |      |      |                | 267 | 1    | 1   | 1   | 1    | 5   | 1    | 1   |
| 1351 | U0279        | 268 | 3          |               | 5 NLD   | 2004    | Hospitalized patient    | Hosp_Surv      | E. faecium | Faeces             | 0        | 1    |      |      |                | 268 | 2    | 1   | 1   | 1    | 1   | 11   | 1   |
| 1352 | E2129        | 269 | 3          |               | 3 NLD   | 2004    | Poultry                 | Animal_Poultry | E. faecium | Faeces             | 1        | 1    |      |      |                | 269 | 2    | 2   | 1   | 6    | 1   | 1    | 1   |
| 1353 | E2104        | 270 | 3          |               | 3 NLD   | 2000    | Poultry                 | Animal_Poultry | E. faecium | Faeces             | 1        | 1    |      |      |                | 270 | 2    | 2   | 24  | 6    | 1   | 1    | 1   |
| 1354 | E2104        | 270 | 3          |               | 3 NLD   | 1999    | Poultry                 | Animal_poultry | E. faecium | Faeces             | 1        | 1    |      |      |                | 270 | 2    | 2   | 24  | 6    | 1   | 1    | 1   |
| 1355 | E2113        | 270 | 3          |               | 3 NLD   | 2000    | Poultry                 | Animal_Poultry | E. faecium | Faeces             | 0        | 1    |      |      |                | 270 | 2    | 2   | 24  | 6    | 1   | 1    | 1   |
| 1356 | A1536        | 271 | 3          |               | 2 DEU   | 2001    | Hospitalized patient    | Clin_Isol      | E. faecium | blood              | 0        | 1    |      |      |                | 271 | 4    | 5   | 1   | 6    | 1   | 1    | 1   |
| 1357 | E2001        | 271 | 3          |               | 2 DEU   | 2000    | Hospitalized patient    | Clin_Isol      | E. faecium | Faeces             | 1        | 1    |      |      |                | 271 | 4    | 5   | 1   | 6    | 1   | 1    | 1   |
| 1358 | E1999        | 272 | 3          |               | 4 DEU   | 2000    | Hospitalized patient    | E. faecium     | Faeces     | 0                  | 1        |      |      |      | 272            | 4   | 5    | 8   | 3   | 1    | 20  | 1    |     |
| 1359 | E3766        | 272 | 3          |               | 4 NLD   | 1994    | Hospitalized patient    | Clin_Isol      | E. faecium | Blood              | 0        | 0    |      |      |                | 272 | 4    | 5   | 8   | 3    | 1   | 20   | 1   |
| 1360 | E4178        | 272 | 3          |               | 4 FRA   | 2003    | Non-hospitalized person | Comm_Surv      | E. faecium | Faeces             | 0        | 1    |      |      |                | 272 | 4    | 5   | 8   | 3    | 1   | 20   | 1   |
| 1361 | E1921        | 273 | 3          |               | 1 NLD   | 2003    | Hospitalized patient    | Clin_Isol      | E. faecium | Blood              | 0        | 1    |      |      |                | 273 | 7    | 3   | 1   | 1    | 5   | 7    | 1   |
| 1362 | E4451        | 274 | 3          |               | 1 NLD   | 2008    | Dog                     | Animal_Dog     | E. faecium | Faeces             | 1        | 1    |      |      |                | 274 | 7    | 3   | 1   | 1    | 1   | 7    | 1   |
| 1363 | E4455        | 274 | 3          |               | 1 NLD   | 2008    | Dog                     | Animal_Dog     | E. faecium | Faeces             | 1        | 1    |      |      |                | 274 | 7    | 3   | 1   | 1    | 1   | 7    | 1   |
| 1364 | E4465        | 274 | 3          |               | 1 NLD   | 2008    | Dog                     | Animal_Dog     | E. faecium | Faeces             | 1        | 1    |      |      |                | 274 | 7    | 3   | 1   | 1    | 1   | 7    | 1   |
| 1365 | E4591        | 274 | 3          |               | 1 NLD   | 2009    | Cat                     | Animal_Cat     | E. faecium | Faeces             | 0        | 1    |      |      |                | 274 | 7    | 3   | 1   | 1    | 1   | 7    | 1   |
| 1366 | U0281        | 274 | 3          |               | 1 NLD   | 2004    | Hospitalized patient    | Hosp_Surv      | E. faecium | Faeces             | 0        | 1    |      |      |                | 274 | 7    | 3   | 1   | 1    | 1   | 7    | 1   |
| 1367 | U0168        | 275 | 3          |               | 3 NLD   | 2004    | Hospitalized patient    | Hosp_Surv      | E. faecium | Faeces             | 0        | 1    |      |      |                | 275 | 7    | 5   | 1   | 1    | 5   | 1    | 1   |
| 1368 | E2003        | 276 | 3          |               | 3 DEU   | 2001    | Hospitalized patient    | E. faecium     | Faeces     | 1                  | 1        |      |      |      | 276            | 7   | 22   | 1   | 1   | 5    | 1   | 1    | 1   |
| 1369 | E2004        | 276 | 3          |               | 3 DEU   | 2001    | Hospitalized patient    | E. faecium     | WA         | Faeces             | 1        | 1    |      |      |                | 276 | 7    | 22  | 1   | 1    | 5   | 1    | 1   |
| 1370 | E2112        | 277 | 2          |               | 1 NLD   | 2000    | Poultry                 | Animal_Poultry | E. faecium | Faeces             | 1        | 1    |      |      |                | 277 | 9    | 2   | 6   | 14   | 1   | 1    | 1   |
| 1371 | A2188        | 278 | 2          |               | 1       |         | Pig                     | Animal_Pig     | E. faecium | Faeces             | 1        | 1    |      |      |                | 278 | 21   | 5   | 1   | 6    | 1   | 1    | 5   |
| 1372 | A2190        | 278 | 2          |               | 1       |         | Pig                     | Animal_Pig     | E. faecium | Faeces             | 1        | 1    |      |      |                | 278 | 21   | 5   | 1   | 6    | 1   | 1    | 5   |
| 1373 | E2127        | 278 | 2          |               | 1 NLD   | 2003    | Pig                     | Animal_pig     | E. faecium | Faeces             | 0        | 1    |      |      |                | 278 | 21   | 5   | 1   | 6    | 1   | 1    | 5   |
| 1374 | A0712        | 279 | 3          |               | 3 DEU   | 2004    | Hospitalized patient    | Clin_Isol      | E. faecium | Blood              | 1        | 1    |      |      |                | 279 | 1    | 5   | 1   | 1    | 1   | 7    | 1   |
| 1375 | A0881        | 279 | 3          |               | 3 DEU   | 2004    | Hospitalized patient    | E. faecium     | human      | Faeces             | 1        | 1    |      |      |                | 279 | 1    | 5   | 1   | 1    | 1   | 7    | 1   |
| 1376 | A1029        | 279 | 3          |               | 3 DEU   | 2004    | Hospitalized patient    | Hosp_Surv      | E. faecium | stool              | 1        | 1    |      |      |                | 279 | 1    | 5   | 1   | 1    | 1   | 7    | 1   |
| 1377 | A1545        | 279 | 3          |               | 3 DEU   | 2004    | Hospitalized patient    | Clin_Isol      | E. faecium | blood              | 1        | 1    |      |      |                | 279 | 1    | 5   | 1   | 1    | 1   | 7    | 1   |
| 1378 | A0713        | 280 | 3          |               | 1 SGP   | 2004    | Hospitalized patient    | Clin_isol      | E. faecium | Blood              | 1        | 1    |      |      |                | 280 | 1    | 3   | 1   | 1    | 1   | 1    | 1   |
| 1379 | A0714        | 280 | 3          |               | 1 SGP   | 2005    | Hospitalized patient    | Clin_Isol      | E. faecium | Urine, vascular ca | 1        | 1    |      |      |                | 280 | 1    | 3   | 1   | 1    | 1   | 1    | 1   |
| 1380 | A1030        | 280 | 3          |               | 1 DEU   | 2005    | Hospitalized patient    | E. faecium     | Faeces     | 1                  | 1        |      |      |      | 280            | 1   | 3    | 1   | 1   | 1    | 1   | 1    | 1   |
| 1381 | RLA-6/TX2063 | 280 | 3          |               | 1 USA   | 1981-87 | Hospitalized patient    |                |            |                    | 1        | 1    |      |      |                | 280 | 1    | 3   | 1   | 1    | 1   | 1    | 1   |
| 1382 | A0158        | 281 | 2          |               | 3 BRA   |         |                         |                | E. faecium | Faeces             | 1        | 1    |      |      |                | 281 | 9    | 24  | 1   | 18   | 1   | 1    | 3   |
| 1383 | A0715        | 282 | 3          |               | 3 DEU   |         | Hospitalized patient    | Clin_Isol      | E. faecium | Peritoneal fluid   | 1        | 1    |      |      |                | 282 | 7    | 1   | 1   | 1    | 5   | 20   | 1   |
| 1384 | A1031        | 282 | 3          |               | 3 DEU   | 2005    | Hospitalized patient    | E. faecium     | Faeces     | 1                  | 1        |      |      |      | 282            | 7   | 1    | 1   | 1   | 5    | 20  | 1    | 1   |
| 1385 | A1554        | 282 | 3          |               | 3 DEU   | 2005    | Hospitalized patient    | Clin_Isol      | E. faecium | blood              | 1        | 1    |      |      |                | 282 | 7    | 1   | 1   | 1    | 5   | 20   | 1   |
| 1386 | A0716        | 283 | 2          |               | 3 DEU   |         | Hospitalized patient    | Clin_Isol      | E. faecium | Urine              | 1        | 1    |      |      |                | 283 | 15   | 25  | 1   | 1    | 1   | 20   | 1   |

Supplementary Table 1. Meta-data of isolates included in this study

| No   | Strain code     | ST  | BAPS group | BAPS subgroup | country | year | Source               | Epidemiology   | Species    | isol_site           | esp_gene | ampR | SgrA | EcbA | Genomic island | ST | AtpA | Ddl | Gdh | PurK | Gyd | PstS | Adk |
|------|-----------------|-----|------------|---------------|---------|------|----------------------|----------------|------------|---------------------|----------|------|------|------|----------------|----|------|-----|-----|------|-----|------|-----|
| 1387 | A1032           | 283 | 2          |               | 3 DEU   | 2005 | Hospitalized patient |                | E. faecium |                     |          |      |      |      | 283            | 15 | 25   | 1   | 1   | 1    | 20  | 1    |     |
| 1388 | A0717           | 284 | 2          |               | 1 ITA   |      |                      |                | E. faecium |                     |          |      |      |      | 284            | 9  | 2    | 1   | 6   | 1    | 1   | 5    |     |
| 1389 | A1151           | 284 | 2          |               | 1 ITA   | 2005 | Hospitalized patient | Clin_isol      | E. faecium | Blood               | 0        | 1    |      |      | 284            | 9  | 2    | 1   | 6   | 1    | 1   | 5    |     |
| 1390 | A0718           | 285 | 1          |               | 1 ITA   |      |                      |                | E. faecium |                     |          |      |      |      | 285            | 25 | 8    | 8   | 23  | 10   | 10  | 11   |     |
| 1391 | A1149           | 285 | 1          |               | 1 ITA   | 2005 | Hospitalized patient | Clin_isol      | E. faecium | Bile                | 0        | 0    |      |      | 285            | 25 | 8    | 8   | 23  | 10   | 10  | 11   |     |
| 1392 | A0719           | 286 | 3          |               | 2 ITA   |      |                      |                | E. faecium |                     |          |      |      |      | 286            | 40 | 4    | 12  | 9   | 1    | 1   | 5    |     |
| 1393 | A1146           | 286 | 3          |               | 2 ITA   | 2005 | Hospitalized patient | Clin_isol      | E. faecium | Bile                | 0        | 0    |      |      | 286            | 40 | 4    | 12  | 9   | 1    | 1   | 5    |     |
| 1394 | A0720           | 287 | 2          |               | 1 ITA   |      |                      |                | E. faecium |                     |          |      |      |      | 287            | 15 | 26   | 1   | 1   | 1    | 1   | 1    |     |
| 1395 | A1123           | 287 | 2          |               | 1 ITA   | 2005 | Hospitalized patient | Hosp_surv      | E. faecium | Skin swab           | 1        | 1    |      |      | 287            | 15 | 26   | 1   | 1   | 1    | 1   | 1    |     |
| 1396 | A1124           | 287 | 2          |               | 1 ITA   | 2005 | Hospitalized patient | Clin_isol      | E. faecium | Bronchoalveolar lav | 1        | 1    |      |      | 287            | 15 | 26   | 1   | 1   | 1    | 1   | 1    |     |
| 1397 | A1139           | 287 | 2          |               | 1 ITA   | 2005 | Hospitalized patient | Clin_isol      | E. faecium | Bile                | 1        | 1    |      |      | 287            | 15 | 26   | 1   | 1   | 1    | 1   | 1    |     |
| 1398 | A0721           | 288 | 2          |               | 1 ITA   |      |                      |                | E. faecium |                     |          |      |      |      | 288            | 15 | 27   | 1   | 1   | 1    | 1   | 1    |     |
| 1399 | A1122           | 288 | 2          |               | 1 ITA   | 2005 | Hospitalized patient | Clin_isol      | E. faecium | Blood               | 1        | 1    |      |      | 288            | 15 | 27   | 1   | 1   | 1    | 1   | 1    |     |
| 1400 | A1125           | 288 | 2          |               | 1 ITA   | 2005 | Hospitalized patient | Clin_isol      | E. faecium | Blood               | 1        | 1    |      |      | 288            | 15 | 27   | 1   | 1   | 1    | 1   | 1    |     |
| 1401 | A1140           | 288 | 2          |               | 1 ITA   | 2005 | Hospitalized patient | Clin_isol      | E. faecium | Abscess drainage    | 1        | 1    |      |      | 288            | 15 | 27   | 1   | 1   | 1    | 1   | 1    |     |
| 1402 | A1141           | 288 | 2          |               | 1 ITA   | 2005 | Hospitalized patient | Clin_isol      | E. faecium | Abdominal drainage  | 1        | 1    |      |      | 288            | 15 | 27   | 1   | 1   | 1    | 1   | 1    |     |
| 1403 | E1861           | 289 | 1          |               | 1 ESP   | 2001 | Hospitalized patient | Hosp_Surv      | E. faecium | Faeces              | 0        | 0    |      |      | 289            | 13 | 8    | 8   | 8   | 6    | 40  | 6    |     |
| 1404 | E1863           | 289 | 1          |               | 1 ESP   | 2001 | Hospitalized patient | Hosp_Surv      | E. faecium | Faeces              | 0        | 0    |      |      | 289            | 13 | 8    | 8   | 8   | 6    | 40  | 6    |     |
| 1405 | A0753           | 290 | 3          |               | 3 KOR   | 2004 | Hospitalized patient |                | E. faecium | Faeces              | 0        | 1    |      |      | 290            | 1  | 12   | 1   | 1   | 1    | 1   | 1    |     |
| 1406 | A0758           | 290 | 3          |               | 3 KOR   | 2004 | Hospitalized patient |                | E. faecium | Faeces              | 0        | 1    |      |      | 290            | 1  | 12   | 1   | 1   | 1    | 1   | 1    |     |
| 1407 | E1857           | 291 | 3          |               | 1 ESP   | 2001 | Hospitalized patient | Hosp_Surv      | E. faecium | Faeces              | 0        | 0    |      |      | 291            | 3  | 19   | 1   | 2   | 1    | 1   | 1    |     |
| 1408 | E1856           | 292 | 3          |               | 1 ESP   | 2001 | Hospitalized patient | Hosp_Surv      | E. faecium | Faeces              | 0        | 0    |      |      | 292            | 3  | 3    | 1   | 31  | 1    | 1   | 1    |     |
| 1409 | E1878           | 293 | 2          |               | 3 NLD   | 2003 | Dog                  | Animal_Dog     | E. faecium | Cerumen             |          |      |      |      | 293            | 5  | 3    | 1   | 6   | 2    | 14  | 1    |     |
| 1410 | A0811           | 294 | 3          |               | 3 UK    | 1990 | Hospitalized patient | Clin_Isol      | E. faecium | Wound swab          | 1        | 1    |      |      | 294            | 2  | 1    | 1   | 1   | 1    | 1   | 1    |     |
| 1411 | A0882           | 294 | 3          |               | 3 DEU   | 2005 | Hospitalized patient | Hosp_Surv      | E. faecium | stool               | 0        | 1    |      |      | 294            | 2  | 1    | 1   | 1   | 1    | 1   | 1    |     |
| 1412 | E4153           | 294 | 3          |               | 3 GBR   | 1997 | Hospitalized patient | Clin_Isol      | E. faecium | Blood               | 1        | 1    |      |      | 294            | 2  | 1    | 1   | 1   | 1    | 1   | 1    |     |
| 1413 | U0216           | 295 | 3          |               | 3 NLD   | 1997 | Hospitalized patient | Clin_Isol      | E. faecium | Blood               | 1        | 1    |      |      | 295            | 1  | 1    | 1   | 1   | 1    | 1   | 6    |     |
| 1414 | E2039           | 296 | 1          |               | 1 DEU   | 2000 | Hospitalized patient |                | E. faecium | K-Spitze            |          |      |      |      | 296            | 25 | 8    | 8   | 8   | 10   | 10  | 6    |     |
| 1415 | E2363           | 296 | 1          |               | 1 NLD   |      | Probiotic            |                | E. faecium | Faeces              | 0        | 0    |      |      | 296            | 25 | 8    | 8   | 8   | 10   | 10  | 6    |     |
| 1416 | E3569           | 296 | 1          |               | 1 NLD   | 2005 | Hospitalized patient | Clin_Isol      | E. faecium | Blood               | 0        | 0    |      |      | 296            | 25 | 8    | 8   | 8   | 10   | 10  | 6    |     |
| 1417 | NEDH 4586/TX205 | 296 | 1          |               | 1 USA   | 1971 | Hospitalized patient |                | E. faecium | Faeces              |          | 1    |      |      | 296            | 25 | 8    | 8   | 8   | 10   | 10  | 6    |     |
| 1418 | NEDH 4901/TX205 | 296 | 1          |               | 1 USA   | 1971 | Hospitalized patient |                | E. faecium | Faeces              |          | 1    |      |      | 296            | 25 | 8    | 8   | 8   | 10   | 10  | 6    |     |
| 1419 | A0818           | 297 | 2          |               | 1 KOR   | 2003 | Poultry              | Animal_poultry | E. faecium | Faeces              | 1        |      |      |      | 297            | 9  | 2    | 6   | 36  | 1    | 1   | 1    |     |
| 1420 | A0819           | 298 | 2          |               | 1 KOR   | 2003 | Poultry              | Animal_poultry | E. faecium | Faeces              | 1        |      |      |      | 298            | 15 | 2    | 24  | 6   | 1    | 7   | 1    |     |
| 1421 | E1972           | 299 | 1          |               | 1 DEU   | 2000 | Hospitalized patient |                | E. faecium | Blood               |          |      |      |      | 299            | 24 | 8    | 8   | 8   | 6    | 10  | 11   |     |
| 1422 | E1976           | 300 | 3          |               | 3 DEU   | 2000 | Hospitalized patient |                | E. faecium | WA                  |          |      |      |      | 300            | 41 | 2    | 1   | 1   | 1    | 1   | 1    |     |
| 1423 | E1984           | 300 | 3          |               | 3 DEU   | 2000 | Hospitalized patient |                | E. faecium | WA                  |          |      |      |      | 300            | 41 | 2    | 1   | 1   | 1    | 1   | 1    |     |
| 1424 | E1988           | 300 | 3          |               | 3 DEU   | 2000 | Hospitalized patient |                | E. faecium | K-Spitze            |          |      |      |      | 300            | 41 | 2    | 1   | 1   | 1    | 1   | 1    |     |
| 1425 | E2015           | 300 | 3          |               | 3 DEU   | 2000 | Hospitalized patient |                | E. faecium | K-Urin              |          |      |      |      | 300            | 41 | 2    | 1   | 1   | 1    | 1   | 1    |     |
| 1426 | E2021           | 300 | 3          |               | 3 DEU   | 2001 | Hospitalized patient |                | E. faecium | K-Urin              |          |      |      |      | 300            | 41 | 2    | 1   | 1   | 1    | 1   | 1    |     |
| 1427 | E2029           | 300 | 3          |               | 3 DEU   | 2000 | Hospitalized patient |                | E. faecium | WA                  |          |      |      |      | 300            | 41 | 2    | 1   | 1   | 1    | 1   | 1    |     |
| 1428 | E2030           | 300 | 3          |               | 3 DEU   | 2000 | Hospitalized patient |                | E. faecium | WA                  |          |      |      |      | 300            | 41 | 2    | 1   | 1   | 1    | 1   | 1    |     |
| 1429 | E2002           | 301 | 2          |               | 1 DEU   | 2001 | Hospitalized patient |                | E. faecium | K-Spitze            |          |      |      |      | 301            | 42 | 2    | 28  | 11  | 1    | 14  | 17   |     |
| 1430 | E2005           | 302 | 3          |               | 3 DEU   | 2001 | Hospitalized patient |                | E. faecium | TS                  |          |      |      |      | 302            | 7  | 22   | 1   | 1   | 12   | 1   | 1    |     |
| 1431 | E2006           | 302 | 3          |               | 3 DEU   | 2001 | Hospitalized patient |                | E. faecium | Thorax-Punktat      |          |      |      |      | 302            | 7  | 22   | 1   | 1   | 12   | 1   | 1    |     |
| 1432 | E2028           | 302 | 3          |               | 3 DEU   | 2000 | Hospitalized patient |                | E. faecium | WA                  |          |      |      |      | 302            | 7  | 22   | 1   | 1   | 12   | 1   | 1    |     |
| 1433 | E2047           | 302 | 3          |               | 3 DEU   | 2000 | Hospitalized patient |                | E. faecium | Urine               |          |      |      |      | 302            | 7  | 22   | 1   | 1   | 12   | 1   | 1    |     |
| 1434 | E2018           | 303 | 3          |               | 3 DEU   | 2000 | Hospitalized patient |                | E. faecium | WA                  |          |      |      |      | 303            | 1  | 22   | 1   | 1   | 1    | 7   | 15   |     |
| 1435 | E2019           | 304 | 2          |               | 1 DEU   | 2000 | Hospitalized patient |                | E. faecium | K-Urin              |          |      |      |      | 304            | 5  | 1    | 1   | 1   | 2    | 2   | 1    |     |
| 1436 | E2025           | 305 | 3          |               | 3 DEU   | 2000 | Hospitalized patient |                | E. faecium | WA                  |          |      |      |      | 305            | 7  | 2    | 1   | 1   | 12   | 1   | 15   |     |
| 1437 | E2044           | 306 | 3          |               | 3 DEU   | 2001 | Hospitalized patient |                | E. faecium | WA                  |          |      |      |      | 306            | 1  | 28   | 1   | 1   | 1    | 1   | 1    |     |
| 1438 | A0883           | 307 | 3          |               | 3 DEU   | 1995 | Hospitalized patient | Clin_Isol      | E. faecium | catheter urine      |          | 1    |      |      | 307            | 1  | 11   | 1   | 1   | 1    | 1   | 1    |     |
| 1439 | A1048           | 307 | 3          |               | 3 DEU   | 1995 | Hospitalized patient | Clin_Isol      | E. faecium | catheter urine      | 1        | 1    |      |      | 307            | 1  | 11   | 1   | 1   | 1    | 1   | 1    |     |
| 1440 | A0885           | 308 | 3          |               | 3 NOR   |      |                      |                | E. faecium |                     |          |      |      |      | 308            | 1  | 29   | 1   | 1   | 1    | 1   | 1    |     |
| 1441 | A0886           | 309 | 2          |               | 1 NOR   |      |                      |                | E. faecium |                     |          |      |      |      | 309            | 5  | 2    | 6   | 6   | 2    | 7   | 1    |     |
| 1442 | A0887           | 310 | 2          |               | 1 NOR   |      |                      |                | E. faecium |                     |          |      |      |      | 310            | 9  | 2    | 1   | 6   | 22   | 7   | 1    |     |
| 1443 | E4200           | 310 | 2          |               | 1 SWE   |      |                      |                | E. faecium |                     |          |      |      |      | 310            | 9  | 2    | 1   | 6   | 22   | 7   | 1    |     |
| 1444 | E4202           | 310 | 2          |               | 1 SWE   | 2001 | Poultry              | Animal_Poultry | E. faecium |                     |          |      |      |      | 310            | 9  | 2    | 1   | 6   | 22   | 7   | 1    |     |
| 1445 | E4205           | 310 | 2          |               | 1 SWE   | 2002 | Poultry              | Animal_Poultry | E. faecium |                     |          |      |      |      | 310            | 9  | 2    | 1   | 6   | 22   | 7   | 1    |     |
| 1446 | E4206           | 310 | 2          |               | 1 SWE   | 2002 | Poultry              | Animal_Poultry | E. faecium |                     |          |      |      |      | 310            | 9  | 2    | 1   | 6   | 22   | 7   | 1    |     |
| 1447 | E4207           | 310 | 2          |               | 1 SWE   | 2002 | Poultry              | Animal_Poultry | E. faecium |                     |          |      |      |      | 310            | 9  | 2    | 1   | 6   | 22   | 7   | 1    |     |
| 1448 | E4208           | 310 | 2          |               | 1 SWE   | 2002 | Poultry              | Animal_Poultry | E. faecium |                     |          |      |      |      | 310            | 9  | 2    | 1   | 6   | 22   | 7   | 1    |     |
| 1449 | E4209           | 310 | 2          |               | 1 SWE   | 2002 | Poultry              | Animal_Poultry | E. faecium |                     |          |      |      |      | 310            | 9  | 2    | 1   | 6   | 22   | 7   | 1    |     |

Supplementary Table 1. Meta-data of isolates included in this study

| No   | Strain code | ST  | BAPS group | BAPS subgroup | country | year | Source               | Epidemiology                | Species        | Isol_site  | esp_gene         | ampR | SgrA | EcbA | Genomic island | ST | AtpA | Ddl | Gdh | PurK | Gyd | PstS | Adk |
|------|-------------|-----|------------|---------------|---------|------|----------------------|-----------------------------|----------------|------------|------------------|------|------|------|----------------|----|------|-----|-----|------|-----|------|-----|
| 1450 | E4210       | 310 | 2          |               | 1 SWE   | 2002 | Poultry              |                             | Animal_Poultry | E. faecium |                  |      |      |      | 310            | 9  | 2    | 1   | 6   | 22   | 7   | 1    |     |
| 1451 | E4212       | 310 | 2          |               | 1 SWE   | 2002 | Poultry              |                             | Animal_Poultry | E. faecium |                  |      |      |      | 310            | 9  | 2    | 1   | 6   | 22   | 7   | 1    |     |
| 1452 | E4213       | 310 | 2          |               | 1 SWE   | 2002 | Poultry              |                             | Animal_Poultry | E. faecium |                  |      |      |      | 310            | 9  | 2    | 1   | 6   | 22   | 7   | 1    |     |
| 1453 | E4214       | 310 | 2          |               | 1 SWE   | 2004 | Poultry              |                             | Animal_Poultry | E. faecium |                  |      |      |      | 310            | 9  | 2    | 1   | 6   | 22   | 7   | 1    |     |
| 1454 | E4215       | 310 | 2          |               | 1 SWE   | 2004 | Poultry              |                             | Animal_Poultry | E. faecium |                  |      |      |      | 310            | 9  | 2    | 1   | 6   | 22   | 7   | 1    |     |
| 1455 | E4216       | 310 | 2          |               | 1 SWE   | 2004 | Poultry              |                             | Animal_Poultry | E. faecium |                  |      |      |      | 310            | 9  | 2    | 1   | 6   | 22   | 7   | 1    |     |
| 1456 | E4218       | 310 | 2          |               | 1 SWE   | 2004 | Poultry              |                             | Animal_Poultry | E. faecium |                  |      |      |      | 310            | 9  | 2    | 1   | 6   | 22   | 7   | 1    |     |
| 1457 | E4219       | 310 | 2          |               | 1 SWE   | 2004 | Poultry              |                             | Animal_Poultry | E. faecium |                  |      |      |      | 310            | 9  | 2    | 1   | 6   | 22   | 7   | 1    |     |
| 1458 | E4220       | 310 | 2          |               | 1 SWE   | 2004 | Poultry              |                             | Animal_Poultry | E. faecium |                  |      |      |      | 310            | 9  | 2    | 1   | 6   | 22   | 7   | 1    |     |
| 1459 | E4222       | 310 | 2          |               | 1 SWE   | 2004 | Poultry              |                             | Animal_Poultry | E. faecium |                  |      |      |      | 310            | 9  | 2    | 1   | 6   | 22   | 7   | 1    |     |
| 1460 | E4223       | 310 | 2          |               | 1 SWE   | 2004 | Poultry              |                             | Animal_Poultry | E. faecium |                  |      |      |      | 310            | 9  | 2    | 1   | 6   | 22   | 7   | 1    |     |
| 1461 | E4225       | 310 | 2          |               | 1 SWE   | 2004 | Poultry              |                             | Animal_Poultry | E. faecium |                  |      |      |      | 310            | 9  | 2    | 1   | 6   | 22   | 7   | 1    |     |
| 1462 | E4226       | 310 | 2          |               | 1 SWE   | 2005 | Poultry              |                             | Animal_Poultry | E. faecium |                  |      |      |      | 310            | 9  | 2    | 1   | 6   | 22   | 7   | 1    |     |
| 1463 | E4227       | 310 | 2          |               | 1 SWE   | 2005 | Poultry              |                             | Animal_Poultry | E. faecium |                  |      |      |      | 310            | 9  | 2    | 1   | 6   | 22   | 7   | 1    |     |
| 1464 | E4229       | 310 | 2          |               | 1 SWE   | 2005 | Poultry              |                             | Animal_Poultry | E. faecium |                  |      |      |      | 310            | 9  | 2    | 1   | 6   | 22   | 7   | 1    |     |
| 1465 | E4230       | 310 | 2          |               | 1 SWE   | 2005 | Poultry              |                             | Animal_Poultry | E. faecium |                  |      |      |      | 310            | 9  | 2    | 1   | 6   | 22   | 7   | 1    |     |
| 1466 | E4231       | 310 | 2          |               | 1 SWE   | 2005 | Poultry              |                             | Animal_Poultry | E. faecium |                  |      |      |      | 310            | 9  | 2    | 1   | 6   | 22   | 7   | 1    |     |
| 1467 | E4232       | 310 | 2          |               | 1 SWE   | 2005 | Poultry              |                             | Animal_Poultry | E. faecium |                  |      |      |      | 310            | 9  | 2    | 1   | 6   | 22   | 7   | 1    |     |
| 1468 | E4234       | 310 | 2          |               | 1 SWE   | 2006 | Poultry              |                             | Animal_Poultry | E. faecium |                  |      |      |      | 310            | 9  | 2    | 1   | 6   | 22   | 7   | 1    |     |
| 1469 | E4235       | 310 | 2          |               | 1 SWE   | 2007 | Poultry              |                             | Animal_Poultry | E. faecium |                  |      |      |      | 310            | 9  | 2    | 1   | 6   | 22   | 7   | 1    |     |
| 1470 | A0888       | 311 | 2          |               | 3 NOR   |      |                      |                             |                | E. faecium |                  |      |      |      | 311            | 9  | 3    | 13  | 6   | 1    | 7   | 1    |     |
| 1471 | A0889       | 312 | 2          |               | 1 NOR   |      |                      |                             |                | E. faecium |                  |      |      |      | 312            | 5  | 2    | 6   | 6   | 2    | 43  | 1    |     |
| 1472 | A0884       | 313 | 2          |               | 1 NOR   |      |                      |                             |                | E. faecium |                  |      |      |      | 313            | 5  | 1    | 1   | 1   | 5    | 1   | 1    |     |
| 1473 | A1074       | 314 | 2          |               | 1 DEU   |      | Hospitalized patient |                             |                | E. faecium |                  |      |      |      | 314            | 43 | 5    | 1   | 1   | 12   | 7   | 1    |     |
| 1474 | A1169       | 315 | 3          |               | 3 JPN   | 1998 | Hospitalized patient | Hospital outbreak JPN-1     |                | E. faecium | Faeces           | 0    |      |      | 315            | 1  | 1    | 1   | 3   | 1    | 1   | 1    |     |
| 1475 | A1170       | 316 | 2          |               | 1 JPN   | 2005 | Hospitalized patient | Hosp_Surv                   |                | E. faecium | Faeces           | 1    |      |      | 316            | 15 | 1    | 1   | 1   | 5    | 1   | 1    |     |
| 1476 | A1621       | 316 | 2          |               | 1 CHN   | 2007 | Hospitalized patient |                             |                | E. faecium |                  |      |      |      | 316            | 15 | 1    | 1   | 1   | 5    | 1   | 1    |     |
| 1477 | A1171       | 317 | 2          |               | 3 DEU   | 2006 | Hospitalized patient | Clin_Isol                   |                | E. faecium | Abdominal infect | 1    | 1    |      | 317            | 15 | 3    | 1   | 1   | 1    | 7   | 1    |     |
| 1478 | A1572       | 317 | 2          |               | 3 DEU   | 2006 | Hospitalized patient | Clin_Isol                   |                | E. faecium | blood            | 1    | 1    |      | 317            | 15 | 3    | 1   | 1   | 1    | 7   | 1    |     |
| 1479 | A1573       | 317 | 2          |               | 3 DEU   | 2006 | Hospitalized patient | Clin_Isol                   |                | E. faecium | blood            | 1    | 1    |      | 317            | 15 | 3    | 1   | 1   | 1    | 7   | 1    |     |
| 1480 | E4450       | 317 | 2          |               | 3 DNK   |      | Dog                  | Animal_Dog                  |                | E. faecium | Urine            | 0    | 1    |      | 317            | 15 | 3    | 1   | 1   | 1    | 7   | 1    |     |
| 1481 | A1172       | 318 | 3          |               | 3 JPN   |      | Hospitalized patient |                             |                | E. faecium |                  |      |      |      | 318            | 44 | 1    | 1   | 1   | 1    | 44  | 1    |     |
| 1482 | A1173       | 319 | 3          |               | 1 JPN   |      |                      |                             |                | E. faecium |                  |      |      |      | 319            | 7  | 30   | 1   | 1   | 5    | 1   | 3    |     |
| 1483 | A1174       | 320 | 2          |               | 4 CHN   |      |                      | Clin_Isol                   |                | E. faecium |                  |      |      |      | 320            | 9  | 1    | 1   | 1   | 12   | 29  | 1    |     |
| 1484 | A1175       | 321 | 3          |               | 1 CHN   |      |                      | Clin_Isol                   |                | E. faecium |                  |      |      |      | 321            | 7  | 3    | 1   | 1   | 1    | 1   | 3    |     |
| 1485 | A1176       | 322 | 3          |               | 3 CHN   |      |                      | Clin_Isol                   |                | E. faecium |                  |      |      |      | 322            | 7  | 1    | 6   | 1   | 5    | 7   | 1    |     |
| 1486 | A1177       | 323 | 2          |               | 1 CHN   |      |                      | Clin_Isol                   |                | E. faecium |                  |      |      |      | 323            | 5  | 1    | 1   | 1   | 1    | 1   | 1    |     |
| 1487 | E2766       | 324 | 2          |               | 1 NLD   | 2003 | Hospitalized patient |                             |                | E. faecium | Blood            | 0    | 1    |      | 324            | 5  | 1    | 1   | 2   | 1    | 1   | 1    |     |
| 1488 | E2883       | 325 | 4          |               | NLD     | 2002 | Hospitalized patient |                             |                | E. faecium | Blood            | 1    | 1    |      | 325            | 7  | 1    | 29  | 1   | 19   | 1   | 1    |     |
| 1489 | E2966       | 326 | 4          |               | NLD     | 2005 | Hospitalized patient |                             |                | E. faecium | Blood            | 1    | 0    |      | 326            | 7  | 1    | 30  | 1   | 14   | 1   | 1    |     |
| 1490 | E3083       | 327 | 1          |               | NLD     | 2000 | Hospitalized patient |                             |                | E. faecium | Blood            | 0    | 0    |      | 327            | 25 | 13   | 9   | 15  | 10   | 19  | 6    |     |
| 1491 | E3548       | 328 | 1          |               | NLD     | 2004 | Hospitalized patient |                             |                | E. faecium | Blood            | 0    | 0    |      | 328            | 25 | 13   | 18  | 17  | 10   | 19  | 6    |     |
| 1492 | E3596       | 329 | 1          |               | NLD     | 1999 | Hospitalized patient |                             |                | E. faecium | Blood            | 0    | 0    |      | 329            | 9  | 8    | 14  | 8   | 10   | 27  | 6    |     |
| 1493 | E3953       | 330 | 3          |               | 1 NLD   | 2001 | Hospitalized patient |                             |                | E. faecium | Blood            | 0    | 0    |      | 330            | 3  | 31   | 1   | 6   | 1    | 45  | 1    |     |
| 1494 | E2620       | 331 | 4          |               | NLD     | 2006 | Hospitalized patient |                             |                | E. faecium | Blood            | 0    | 0    |      | 331            | 19 | 13   | 32  | 37  | 14   | 19  | 6    |     |
| 1495 | E3346       | 332 | 4          |               | NLD     | 2002 | Hospitalized patient |                             |                | E. faecium | Blood            | 1    | 0    |      | 332            | 9  | 2    | 33  | 11  | 16   | 14  | 6    |     |
| 1496 | A1180       | 333 | 2          |               | 1 KOR   | 2004 | Hospitalized patient |                             |                | E. faecium |                  | 1    |      |      | 333            | 15 | 2    | 1   | 1   | 1    | 7   | 1    |     |
| 1497 | E2948       | 334 | 1          |               | NLD     | 2005 | Hospitalized patient |                             |                | E. faecium | Blood            | 0    | 0    |      | 334            | 13 | 8    | 15  | 8   | 11   | 19  | 6    |     |
| 1498 | A1181       | 335 | 6          |               | CHN     |      |                      | Clin_Isol                   |                | E. faecium |                  |      |      |      | 335            | 45 | 13   | 34  | 15  | 19   | 29  | 18   |     |
| 1499 | A1304       | 336 | 3          |               | 3 ESP   | 2004 | Hospitalized patient | Hospital outbreak Santander |                | E. faecium | Ascitis fluid    | 0    | 1    |      | 336            | 7  | 32   | 1   | 1   | 5    | 1   | 1    |     |
| 1500 | A1305       | 337 | 2          |               | 4 USA   | 1995 | Hospitalized patient |                             |                | E. faecium | Blood            | 1    | 1    |      | 337            | 5  | 3    | 1   | 38  | 8    | 6   | 1    |     |
| 1501 | A1306       | 338 | 3          |               | 3 JPN   | 2005 | Hospitalized patient |                             |                | E. faecium | Urine            | 1    | 1    |      | 338            | 44 | 1    | 1   | 1   | 1    | 1   | 1    |     |
| 1502 | A1307       | 339 | 2          |               | 1 JPN   | 2006 | Hospitalized patient | Hosp_surv                   |                | E. faecium | Faeces           | 1    | 1    |      | 339            | 15 | 1    | 1   | 1   | 1    | 1   | 19   |     |
| 1503 | A1308       | 340 | 3          |               | 3 JPN   | 2006 | Hospitalized patient |                             |                | E. faecium | Bile             | 1    | 1    |      | 340            | 7  | 1    | 35  | 1   | 5    | 1   | 1    |     |
| 1504 | A1311       | 341 | 2          |               | 1 CHN   | 2007 | Hospitalized patient |                             |                | E. faecium | Blood            | 1    | 1    |      | 341            | 15 | 5    | 1   | 1   | 1    | 1   | 1    |     |
| 1505 | A1397       | 341 | 2          |               | 1 CHN   | 2007 | Hospitalized patient |                             |                | E. faecium | Drain            | 1    | 1    |      | 341            | 15 | 5    | 1   | 1   | 1    | 1   | 1    |     |
| 1506 | A1400       | 341 | 2          |               | 1 CHN   | 2007 | Hospitalized patient |                             |                | E. faecium | Aspirate         | 1    | 1    |      | 341            | 15 | 5    | 1   | 1   | 1    | 1   | 1    |     |
| 1507 | A1402       | 341 | 2          |               | 1 CHN   | 2007 | Hospitalized patient |                             |                | E. faecium | Bile             | 1    | 1    |      | 341            | 15 | 5    | 1   | 1   | 1    | 1   | 1    |     |
| 1508 | A1312       | 342 | 3          |               | 3 CHN   | 2007 | Hospitalized patient |                             |                | E. faecium | Blood            | 1    | 1    |      | 342            | 7  | 5    | 1   | 1   | 1    | 1   | 1    |     |
| 1509 | A1313       | 343 | 2          |               | 1 CHN   | 2007 | Hospitalized patient |                             |                | E. faecium | Blood            | 0    | 1    |      | 343            | 15 | 1    | 1   | 39  | 1    | 20  | 1    |     |
| 1510 | A1396       | 343 | 2          |               | 1 CHN   | 2007 | Hospitalized patient |                             |                | E. faecium | Blood            | 1    | 1    |      | 343            | 15 | 1    | 1   | 39  | 1    | 20  | 1    |     |
| 1511 | A1398       | 343 | 2          |               | 1 CHN   | 2007 | Hospitalized patient |                             |                | E. faecium | Blood            | 0    | 1    |      | 343            | 15 | 1    | 1   | 39  | 1    | 20  | 1    |     |
| 1512 | E4134       | 344 | 3          |               | 3 GBR   | 1988 | Hospitalized patient |                             |                | E. faecium | Blood            | 0    | 1    |      | 344            | 7  | 1    | 1   | 1   | 5    | 47  | 1    |     |



Supplementary Table 1. Meta-data of isolates included in this study

| No   | Strain code | ST  | BAPS group | BAPS subgroup | country | year   | Source                  | Epidemiology         | Species    | Isol_site        | esp_gene | ampR | SgrA | EcbA | Genomic island | ST  | AtpA | Ddl | Gdh | PurK | Gyd | PstS | Adk |
|------|-------------|-----|------------|---------------|---------|--------|-------------------------|----------------------|------------|------------------|----------|------|------|------|----------------|-----|------|-----|-----|------|-----|------|-----|
| 1513 | E4135       | 345 | 1          |               | GBR     | 1988   | Hospitalized patient    | Clin_Isol            | E. faecium | Blood            | 0        | 0    |      |      |                | 345 | 25   | 8   | 8   | 8    | 10  | 48   | 6   |
| 1514 | E4136       | 346 | 1          |               | GBR     | 1989   | Hospitalized patient    | Clin_Isol            | E. faecium | Blood            | 0        | 0    |      |      |                | 346 | 9    | 33  | 36  | 40   | 2   | 49   | 6   |
| 1515 | E4140       | 347 | 3          | 5             | GBR     | 1991   | Hospitalized patient    | Clin_Isol            | E. faecium | Blood            | 1        | 0    |      |      |                | 347 | 2    | 5   | 3   | 5    | 4   | 50   | 1   |
| 1516 | E4154       | 348 | 3          | 3             | GBR     | 1997   | Hospitalized patient    | Clin_Isol            | E. faecium | Blood            | 1        | 1    |      |      |                | 348 | 7    | 1   | 1   | 1    | 2   | 1    | 1   |
| 1517 | E4162       | 348 | 3          | 3             | GBR     | 2000   | Hospitalized patient    | Clin_Isol            | E. faecium | Blood            | 1        | 1    |      |      |                | 348 | 7    | 1   | 1   | 1    | 2   | 1    | 1   |
| 1518 | E4157       | 349 | 3          | 3             | GBR     | 1998   | Hospitalized patient    | Clin_Isol            | E. faecium | Blood            | 0        | 1    |      |      |                | 349 | 1    | 2   | 1   | 1    | 5   | 1    | 1   |
| 1519 | E4158       | 350 | 2          | 1             | GBR     | 1999   | Hospitalized patient    | Clin_Isol            | E. faecium | Blood            | 1        | 1    |      |      |                | 350 | 5    | 2   | 1   | 11   | 1   | 1    | 5   |
| 1520 | E4164       | 351 | 3          | 3             | GBR     | 2000   | Hospitalized patient    | Clin_Isol            | E. faecium | Blood            | 1        | 1    |      |      |                | 351 | 7    | 15  | 1   | 1    | 5   | 1    | 1   |
| 1521 | E4168       | 352 | 1          |               | GBR     | 2002   | Hospitalized patient    | Clin_Isol            | E. faecium | Blood            | 0        | 0    |      |      |                | 352 | 13   | 8   | 10  | 8    | 6   | 10   | 6   |
| 1522 | E4170       | 353 | 4          |               | GBR     | 2002   | Hospitalized patient    | Clin_Isol            | E. faecium | Blood            | 1        | 1    |      |      |                | 353 | 7    | 1   | 22  | 1    | 23  | 1    | 1   |
| 1523 | A1315       | 354 | 3          | 2             | ITA     |        |                         |                      | E. faecium |                  |          |      |      |      |                | 354 | 4    | 2   | 1   | 41   | 1   | 1    | 5   |
| 1524 | A1316       | 355 | 3          | 5             | ITA     |        |                         |                      | E. faecium |                  |          |      |      |      |                | 355 | 3    | 34  | 1   | 6    | 1   | 11   | 1   |
| 1525 | A1317       | 355 | 3          | 5             | ITA     |        |                         |                      | E. faecium |                  |          |      |      |      |                | 355 | 3    | 34  | 1   | 6    | 1   | 11   | 1   |
| 1526 | A1322       | 356 | 1          |               | PRT     | 2005   | Hospitalized patient    | Clin_Isol            | E. faecium | Blood            | 0        |      |      |      |                | 356 | 46   | 18  | 10  | 23   | 1   | 46   | 11  |
| 1527 | E4180       | 357 | 4          |               | FRA     | 2003   | Non-hospitalized person | Comm_Surv            | E. faecium | Faeces           |          | 1    |      |      |                | 357 | 1    | 1   | 37  | 1    | 24  | 1    | 1   |
| 1528 | A1351       | 358 | 2          | 1             | SAU     | < 2004 | Hospitalized patient    | Hosp_Surv            | E. faecium | Faeces           | 0        |      |      |      |                | 358 | 9    | 2   | 1   | 32   | 1   | 1    | 1   |
| 1529 | A1352       | 359 | 3          | 3             | SAU     | < 2004 | Hospitalized patient    | Hosp_Surv            | E. faecium | Faeces           | 1        |      |      |      |                | 359 | 7    | 1   | 1   | 1    | 1   | 7    | 1   |
| 1530 | A1353       | 360 | 3          | 1             | SAU     | < 2004 | Hospitalized patient    |                      | E. faecium | Unknown          | 1        |      |      |      |                | 360 | 1    | 36  | 1   | 1    | 1   | 1    | 1   |
| 1531 | A1355       | 361 | 1          |               | PRT     | 2005   | Environment             | Environment_Hospital | E. faecium | Hospital Laundry |          |      |      |      |                | 361 | 13   | 8   | 8   | 8    | 6   | 51   | 6   |
| 1532 | A1356       | 361 | 1          |               | PRT     | 2005   | Environment             | Environment_Hospital | E. faecium | Hospital Laundry |          |      |      |      |                | 361 | 13   | 8   | 8   | 8    | 6   | 51   | 6   |
| 1533 | A1357       | 361 | 1          |               | PRT     | 2005   | Environment             | Environment_Hospital | E. faecium | Hospital Laundry |          |      |      |      |                | 361 | 13   | 8   | 8   | 8    | 6   | 51   | 6   |
| 1534 | A1358       | 361 | 1          |               | PRT     | 2005   | Environment             | Environment_Hospital | E. faecium | Hospital Laundry |          |      |      |      |                | 361 | 13   | 8   | 8   | 8    | 6   | 51   | 6   |
| 1535 | A1359       | 361 | 1          |               | PRT     | 2005   | Environment             | Environment_Hospital | E. faecium | Hospital Laundry |          |      |      |      |                | 361 | 13   | 8   | 8   | 8    | 6   | 51   | 6   |
| 1536 | A1407       | 362 | 6          |               | CHN     | 2006   | Hospitalized patient    |                      | E. faecium |                  |          |      |      |      |                | 362 | 45   | 1   | 32  | 39   | 14  | 1    | 18  |
| 1537 | A1408       | 363 | 2          | 1             | CHN     | 2006   | Hospitalized patient    |                      | E. faecium |                  |          |      |      |      |                | 363 | 15   | 1   | 1   | 39   | 1   | 1    | 1   |
| 1538 | A1409       | 363 | 2          | 1             | CHN     | 2006   | Hospitalized patient    |                      | E. faecium |                  |          |      |      |      |                | 363 | 15   | 1   | 1   | 39   | 1   | 1    | 1   |
| 1539 | A1411       | 363 | 2          | 1             | CHN     | 2007   | Hospitalized patient    |                      | E. faecium |                  |          |      |      |      |                | 363 | 15   | 1   | 1   | 39   | 1   | 1    | 1   |
| 1540 | A1410       | 364 | 3          | 3             | CHN     | 2006   | Hospitalized patient    |                      | E. faecium |                  |          |      |      |      |                | 364 | 7    | 1   | 1   | 1    | 1   | 20   | 1   |
| 1541 | A1412       | 365 | 2          | 1             | CHN     | 2007   | Hospitalized patient    |                      | E. faecium |                  |          |      |      |      |                | 365 | 15   | 1   | 1   | 1    | 1   | 20   | 2   |
| 1542 | A1416       | 366 | 5          |               | PRT     | 1999   | Hospitalized patient    | Clin_Isol            | E. faecium | Urine            | 1        | 1    |      |      |                | 366 | 47   | 1   | 1   | 1    | 14  | 1    | 1   |
| 1543 | A1417       | 367 | 5          |               | PRT     | 2000   | Hospitalized patient    | Clin_Isol            | E. faecium | Drain            | 1        | 1    |      |      |                | 367 | 47   | 37  | 1   | 1    | 1   | 1    | 1   |
| 1544 | A1418       | 368 | 3          | 3             | PRT     | 2001   | Sewage                  | Environment          | E. faecium |                  | 1        | 1    |      |      |                | 368 | 7    | 38  | 1   | 1    | 12  | 1    | 1   |
| 1545 | A1419       | 369 | 5          |               | PRT     | 2003   | Sewage                  | Environment          | E. faecium |                  | 1        | 1    |      |      |                | 369 | 48   | 1   | 1   | 1    | 12  | 1    | 1   |
| 1546 | A2215       | 370 | 2          | 1             |         |        | Poultry                 | Animal_Poultry       | E. faecium | Faeces           |          |      |      |      |                | 370 | 5    | 2   | 6   | 6    | 1   | 16   | 1   |
| 1547 | E4196       | 370 | 2          | 1             | SWE     | 2000   | Poultry                 | Animal_Poultry       | E. faecium |                  |          |      |      |      |                | 370 | 5    | 2   | 6   | 6    | 1   | 16   | 1   |
| 1548 | A1585       | 371 | 3          | 1             | DEU     | 2006   | Hospitalized patient    | Clin_Isol            | E. faecium | blood            | 1        | 1    |      |      |                | 371 | 1    | 8   | 1   | 1    | 1   | 1    | 1   |
| 1549 | A1493       | 372 | 3          | 3             | DEU     | 1994   | Hospitalized patient    | Clin_Isol            | E. faecium | blood            | 0        | 1    |      |      |                | 372 | 2    | 5   | 1   | 3    | 1   | 1    | 1   |
| 1550 | A1494       | 373 | 2          | 1             | DEU     | 1994   | Hospitalized patient    | Clin_Isol            | E. faecium | blood            | 0        | 1    |      |      |                | 373 | 5    | 2   | 1   | 3    | 1   | 36   | 1   |
| 1551 | E4463       | 373 | 2          | 1             | NLD     | 2008   | Dog                     | Animal_Dog           | E. faecium | Faeces           |          |      |      |      |                | 373 | 5    | 2   | 1   | 3    | 1   | 36   | 1   |
| 1552 | A1521       | 374 | 2          | 1             | DEU     | 1999   | Hospitalized patient    | Clin_Isol            | E. faecium | blood            | 0        | 1    |      |      |                | 374 | 5    | 2   | 1   | 12   | 1   | 1    | 5   |
| 1553 | A1533       | 375 | 2          | 3             | DEU     | 2000   | Hospitalized patient    | Clin_Isol            | E. faecium | blood            | 1        | 1    |      |      |                | 375 | 9    | 3   | 1   | 1    | 12  | 1    | 1   |
| 1554 | A1547       | 376 | 2          | 3             | DEU     | 2004   | Hospitalized patient    | Clin_Isol            | E. faecium | blood            | 0        | 1    |      |      |                | 376 | 9    | 12  | 1   | 1    | 12  | 1    | 1   |
| 1555 | A1598       | 377 | 2          | 1             | DEU     | 2006   | Hospitalized patient    | Clin_Isol            | E. faecium | blood            | 1        | 1    |      |      |                | 377 | 15   | 1   | 1   | 1    | 2   | 7    | 1   |
| 1556 | A1555       | 378 | 3          | 3             | DEU     | 2005   | Hospitalized patient    | Clin_Isol            | E. faecium | blood            | 0        | 1    |      |      |                | 378 | 1    | 2   | 1   | 1    | 1   | 7    | 1   |
| 1557 | A1609       | 378 | 3          | 3             | DEU     | 2007   | Hospitalized patient    | Clin_Isol            | E. faecium | blood            | 0        | 1    |      |      |                | 378 | 1    | 2   | 1   | 1    | 1   | 7    | 1   |
| 1558 | A1628       | 379 | 3          | 1             | DNK     | 2004   | Hospitalized patient    | Clin_Isol            | E. faecium | blood            |          |      |      |      |                | 379 | 2    | 3   | 6   | 6    | 1   | 1    | 1   |
| 1559 | A1629       | 380 | 3          | 3             | DNK     | 2004   | Hospitalized patient    | Clin_Isol            | E. faecium | blood            |          |      |      |      |                | 380 | 7    | 28  | 1   | 1    | 5   | 1    | 1   |
| 1560 | A1644       | 381 | 2          | 1             | POL     | 2000   | Hospitalized patient    | Hosp_Surv            | E. faecium | stool            |          |      |      |      |                | 381 | 9    | 1   | 1   | 18   | 1   | 1    | 3   |
| 1561 | A1645       | 382 | 2          | 1             | POL     | 1999   | Hospitalized patient    | Clin_Isol            | E. faecium | urine            |          |      |      |      |                | 382 | 9    | 5   | 1   | 1    | 1   | 1    | 3   |
| 1562 | A1646       | 383 | 2          | 2             | POL     | 1999   | Hospitalized patient    | Clin_Isol            | E. faecium | blood            |          |      |      |      |                | 383 | 9    | 5   | 1   | 1    | 1   | 1    | 18  |
| 1563 | A1647       | 384 | 2          | 1             | POL     | 2000   | Hospitalized patient    | Clin_Isol            | E. faecium | blood            |          |      |      |      |                | 384 | 9    | 5   | 1   | 18   | 1   | 1    | 3   |
| 1564 | A1648       | 385 | 3          | 5             | POL     | 2002   | Hospitalized patient    | Hosp_Surv            | E. faecium | stool            |          |      |      |      |                | 385 | 1    | 5   | 1   | 1    | 1   | 6    | 3   |
| 1565 | A1649       | 386 | 3          | 5             | POL     | 2003   | Hospitalized patient    | Hosp_Surv            | E. faecium | stool            |          |      |      |      |                | 386 | 1    | 1   | 1   | 1    | 1   | 6    | 1   |
| 1566 | A1650       | 387 | 2          | 1             | POL     | 2003   | Hospitalized patient    | Clin_Isol            | E. faecium | blood            |          |      |      |      |                | 387 | 9    | 5   | 1   | 1    | 1   | 7    | 3   |
| 1567 | A1651       | 388 | 3          | 3             | POL     | 2005   | Hospitalized patient    | Hosp_Surv            | E. faecium | rectum           |          |      |      |      |                | 388 | 7    | 1   | 1   | 1    | 5   | 1    | 3   |
| 1568 | A1652       | 389 | 3          | 3             | POL     | 2005   | Hospitalized patient    | Clin_Isol            | E. faecium | wound            |          |      |      |      |                | 389 | 1    | 5   | 1   | 1    | 1   | 1    | 3   |
| 1569 | A1653       | 390 | 3          | 1             | PRT     | 2002   | Hospitalized patient    |                      | E. faecium |                  | 0        | 1    |      |      |                | 390 | 1    | 39  | 1   | 1    | 1   | 1    | 1   |
| 1570 | A1654       | 391 | 3          | 1             | PRT     | 2007   | Hospitalized patient    |                      | E. faecium | pus              | 1        | 1    |      |      |                | 391 | 7    | 3   | 1   | 1    | 12  | 1    | 20  |
| 1571 | A1655       | 392 | 3          | 1             | PRT     | 2001   | Non-hospitalized person | Comm_Surv            | E. faecium | Faeces           | 0        | 0    |      |      |                | 392 | 2    | 3   | 1   | 2    | 1   | 53   | 1   |
| 1572 | A1656       | 393 | 2          | 1             | PRT     | 2006   | Non-hospitalized person | Animal_pig           | E. faecium | Dry dung         | 0        | 1    |      |      |                | 393 | 5    | 2   | 1   | 1    | 1   | 1    | 1   |
| 1573 | E4539       | 393 | 2          | 1             | NLD     |        | Non-hospitalized person | Comm_Surv            | E. faecium | Faeces           |          |      |      |      |                | 393 | 5    | 2   | 1   | 1    | 1   | 1    | 1   |
| 1574 | E4540       | 393 | 2          | 1             | NLD     |        | Non-hospitalized person | Comm_Surv            | E. faecium | Faeces           |          |      |      |      |                | 393 | 5    | 2   | 1   | 1    | 1   | 1    | 1   |
| 1575 | E4545       | 393 | 2          | 1             | NLD     |        | Non-hospitalized person | Comm_Surv            | E. faecium | Faeces           |          |      |      |      |                | 393 | 5    | 2   | 1   | 1    | 1   | 1    | 1   |

Supplementary Table 1. Meta-data of isolates included in this study

| No   | Strain code | ST  | BAPS group | BAPS subgroup | country | year | Source                  | Epidemiology           | Species    | Isol_site      | esp_gene | ampR | SgrA | EcbA | Genomic island | ST  | AtpA | Ddl | Gdh | PurK | Gyd | PstS | Adk |
|------|-------------|-----|------------|---------------|---------|------|-------------------------|------------------------|------------|----------------|----------|------|------|------|----------------|-----|------|-----|-----|------|-----|------|-----|
| 1576 | E4546       | 393 | 2          | 1             | NLD     |      | Non-hospitalized person | Comm_Surv              | E. faecium | Faeces         |          | 1    |      |      |                | 393 | 5    | 2   | 1   | 1    | 1   | 1    | 1   |
| 1577 | E4547       | 393 | 2          | 1             | NLD     |      | Non-hospitalized person | Comm_Surv              | E. faecium | Faeces         |          |      |      |      |                | 393 | 5    | 2   | 1   | 1    | 1   | 1    | 1   |
| 1578 | A1658       | 394 | 5          |               | PRT     | 1999 | Poultry                 | Animal_Poultry         | E. faecium | Carcass        | 0        | 0    |      |      | 394            | 47  | 2    | 6   | 6   | 1    | 7   | 1    |     |
| 1579 | A1659       | 395 | 2          | 1             | PRT     | 2001 | Poultry                 | Animal_Poultry         | E. faecium | Carcass        | 0        | 0    |      |      | 395            | 9   | 2    | 6   | 6   | 1    | 8   | 1    |     |
| 1580 | A1661       | 396 | 2          | 3             | DNK     |      | Dog                     | Animal_Dog             | E. faecium | Faeces         |          |      |      |      | 396            | 5   | 3    | 1   | 14  | 25   | 1   | 1    |     |
| 1581 | E4405       | 397 | 2          | 1             | DNK     |      | Dog                     | Animal_Dog             | E. faecium | Faeces         | 0        | 1    |      |      | 397            | 15  | 1    | 1   | 42  | 1    | 1   | 1    |     |
| 1582 | E4412       | 398 | 2          | 1             | GBR     |      | Dog                     | Animal_Dog             | E. faecium | Faeces         | 0        | 1    |      |      | 398            | 15  | 1    | 6   | 1   | 1    | 7   | 1    |     |
| 1583 | E4414       | 398 | 2          | 1             | GBR     |      | Dog                     | Animal_Dog             | E. faecium | Faeces         | 0        | 1    |      |      | 398            | 15  | 1    | 6   | 1   | 1    | 7   | 1    |     |
| 1584 | E4416       | 398 | 2          | 1             | GBR     |      | Dog                     | Animal_Dog             | E. faecium | Faeces         | 0        | 1    |      |      | 398            | 15  | 1    | 6   | 1   | 1    | 7   | 1    |     |
| 1585 | E4419       | 398 | 2          | 1             | GBR     |      | Dog                     | Animal_Dog             | E. faecium | Faeces         | 0        | 1    |      |      | 398            | 15  | 1    | 6   | 1   | 1    | 7   | 1    |     |
| 1586 | E4420       | 398 | 2          | 1             | GBR     |      | Dog                     | Animal_Dog             | E. faecium | Faeces         | 0        | 1    |      |      | 398            | 15  | 1    | 6   | 1   | 1    | 7   | 1    |     |
| 1587 | E4431       | 398 | 2          | 1             | GBR     |      | Dog                     | Animal_Dog             | E. faecium | Faeces         | 0        | 1    |      |      | 398            | 15  | 1    | 6   | 1   | 1    | 7   | 1    |     |
| 1588 | E4433       | 398 | 2          | 1             | GBR     |      | Dog                     | Animal_Dog             | E. faecium | Faeces         | 0        | 1    |      |      | 398            | 15  | 1    | 6   | 1   | 1    | 7   | 1    |     |
| 1589 | E4438       | 398 | 2          | 1             | GBR     |      | Dog                     | Animal_Dog             | E. faecium | Faeces         | 0        | 1    |      |      | 398            | 15  | 1    | 6   | 1   | 1    | 7   | 1    |     |
| 1590 | E4440       | 398 | 2          | 1             | GBR     |      | Dog                     | Animal_Dog             | E. faecium | Faeces         | 0        | 1    |      |      | 398            | 15  | 1    | 6   | 1   | 1    | 7   | 1    |     |
| 1591 | E4441       | 398 | 2          | 1             | GBR     |      | Dog                     | Animal_Dog             | E. faecium | Faeces         | 0        | 1    |      |      | 398            | 15  | 1    | 6   | 1   | 1    | 7   | 1    |     |
| 1592 | E4443       | 398 | 2          | 1             | GBR     |      | Dog                     | Animal_Dog             | E. faecium | Faeces         | 0        | 1    |      |      | 398            | 15  | 1    | 6   | 1   | 1    | 7   | 1    |     |
| 1593 | E4444       | 398 | 2          | 1             | GBR     |      | Dog                     | Animal_Dog             | E. faecium | Faeces         | 0        | 1    |      |      | 398            | 15  | 1    | 6   | 1   | 1    | 7   | 1    |     |
| 1594 | E4445       | 398 | 2          | 1             | GBR     |      | Dog                     | Animal_Dog             | E. faecium | Faeces         | 0        | 1    |      |      | 398            | 15  | 1    | 6   | 1   | 1    | 7   | 1    |     |
| 1595 | E4448       | 398 | 2          | 1             | GBR     |      | Dog                     | Animal_Dog             | E. faecium | Faeces         | 0        | 1    |      |      | 398            | 15  | 1    | 6   | 1   | 1    | 7   | 1    |     |
| 1596 | E4428       | 399 | 2          | 1             | GBR     |      | Dog                     | Animal_Dog             | E. faecium | Faeces         | 0        | 1    |      |      | 399            | 15  | 27   | 1   | 1   | 1    | 7   | 1    |     |
| 1597 | E4423       | 400 | 3          | 2             | GBR     |      | Dog                     | Animal_Dog             | E. faecium | Faeces         | 0        | 1    |      |      | 400            | 4   | 1    | 1   | 1   | 1    | 7   | 1    |     |
| 1598 | E4413       | 401 | 3          | 2             | GBR     |      | Dog                     | Animal_Dog             | E. faecium | Faeces         | 0        | 1    |      |      | 401            | 4   | 1    | 6   | 6   | 1    | 20  | 1    |     |
| 1599 | E4418       | 401 | 3          | 2             | GBR     |      | Dog                     | Animal_Dog             | E. faecium | Faeces         | 0        | 1    |      |      | 401            | 4   | 1    | 6   | 6   | 1    | 20  | 1    |     |
| 1600 | E4415       | 402 | 2          | 3             | GBR     |      | Dog                     | Animal_Dog             | E. faecium | Faeces         | 0        | 1    |      |      | 402            | 15  | 3    | 6   | 6   | 1    | 7   | 1    |     |
| 1601 | A1662       | 403 | 2          | 1             | KOR     | 2006 | Hospitalized patient    | Hosp_Surv              | E. faecium | Faeces         |          |      |      |      | 403            | 15  | 1    | 1   | 1   | 1    | 7   | 21   |     |
| 1602 | A1663       | 404 | 3          | 2             | PRT     | 1997 | Pig                     | Animal_pig             | E. faecium | Faeces         | 0        | 0    |      |      | 404            | 4   | 2    | 1   | 43  | 1    | 54  | 5    |     |
| 1603 | A1664       | 405 | 5          |               | PRT     | 1999 | Poultry                 | Animal_Poultry         | E. faecium | Carcass        | 0        | 0    |      |      | 405            | 49  | 2    | 6   | 6   | 1    | 1   | 1    |     |
| 1604 | A1665       | 406 | 3          | 5             | PRT     | 2001 | Poultry                 | Animal_Poultry         | E. faecium | Carcass        | 0        | 0    |      |      | 406            | 4   | 2    | 1   | 3   | 1    | 41  | 1    |     |
| 1605 | A1667       | 407 | 3          | 5             | POL     | 1997 | Hospitalized patient    | Clin_Isol              | E. faecium | blood          |          |      |      |      | 407            | 1   | 3    | 1   | 1   | 1    | 52  | 1    |     |
| 1606 | A1668       | 408 | 2          | 4             | POL     | 1997 | Hospitalized patient    | Clin_Isol              | E. faecium | Faeces         |          |      |      |      | 408            | 9   | 3    | 1   | 1   | 1    | 52  | 1    |     |
| 1607 | A1669       | 409 | 3          | 3             | POL     | 2003 | Hospitalized patient    | Clin_Isol              | E. faecium | wound          |          |      |      |      | 409            | 7   | 1    | 1   | 1   | 12   | 1   | 3    |     |
| 1608 | A1670       | 410 | 2          | 1             | POL     | 2003 | Hospitalized patient    | Clin_Isol              | E. faecium | Faeces         |          |      |      |      | 410            | 9   | 1    | 1   | 1   | 1    | 1   | 3    |     |
| 1609 | A1671       | 411 | 2          | 1             | POL     | 1998 | Hospitalized patient    | Clin_Isol              | E. faecium | Faeces         |          |      |      |      | 411            | 50  | 1    | 6   | 18  | 1    | 1   | 1    |     |
| 1610 | A1703       | 412 | 2          | 1             | GRC     | 2004 | Hospitalized patient    | Clin_Isol              | E. faecium | Blood          | 1        | 1    |      |      | 412            | 15  | 1    | 1   | 44  | 1    | 20  | 1    |     |
| 1611 | A1708       | 412 | 2          | 1             | GRC     | 2005 | Hospitalized patient    | Hospital outbreak GR-3 | E. faecium | Blood          | 1        | 1    |      |      | 412            | 15  | 1    | 1   | 44  | 1    | 20  | 1    |     |
| 1612 | A1709       | 412 | 2          | 1             | GRC     | 2005 | Hospitalized patient    | Clin_Isol              | E. faecium | Pus            | 1        | 1    |      |      | 412            | 15  | 1    | 1   | 44  | 1    | 20  | 1    |     |
| 1613 | A1710       | 412 | 2          | 1             | GRC     | 2006 | Hospitalized patient    | Hospital outbreak GR-3 | E. faecium | Blood          | 1        | 1    |      |      | 412            | 15  | 1    | 1   | 44  | 1    | 20  | 1    |     |
| 1614 | A2085       | 412 | 2          | 1             | BRA     | 2008 | Hospitalized patient    | Clin_Isol              | E. faecium | Blood          |          |      |      |      | 412            | 15  | 1    | 1   | 44  | 1    | 20  | 1    |     |
| 1615 | A1704       | 413 | 3          | 3             | DEU     | 2004 | Non-hospitalized person | Comm_Surv              | E. faecium | blood          | 0        | 0    |      |      | 413            | 7   | 1    | 6   | 6   | 5    | 7   | 1    |     |
| 1616 | A1706       | 414 | 2          | 1             | AUS     | 2008 | Hospitalized patient    | Hosp_Surv              | E. faecium | Rectal Swab    |          | 1    |      |      | 414            | 15  | 5    | 1   | 1   | 1    | 20  | 1    |     |
| 1617 | A1707       | 415 | 3          | 1             | JPN     | 1997 | Hospitalized patient    | Clin_Isol              | E. faecium | Wound          |          |      |      |      | 415            | 1   | 33   | 1   | 1   | 1    | 1   | 6    |     |
| 1618 | A1711       | 416 | 2          | 3             | ESP     | 2006 | Hospitalized patient    | Hosp_Surv              | E. faecium | Swab           |          |      |      |      | 416            | 5   | 3    | 1   | 2   | 2    | 1   | 1    |     |
| 1619 | A1712       | 417 | 2          | 3             | ESP     | 2006 | Hospitalized patient    | Hosp_Surv              | E. faecium | Swab           |          |      |      |      | 417            | 5   | 7    | 5   | 7   | 2    | 1   | 1    |     |
| 1620 | A1731       | 418 | 2          | 1             | JPN     | 1998 | Hospitalized patient    | Clin_Isol              | E. faecium | Urine          |          |      |      |      | 418            | 9   | 1    | 1   | 18  | 1    | 1   | 1    |     |
| 1621 | A1738       | 419 | 6          |               | ESP     | 2005 | Hospitalized patient    | Clin_Isol              | E. faecium | Blood          | 1        | 1    |      |      | 419            | 47  | 1    | 32  | 1   | 14   | 1   | 18   |     |
| 1622 | A1771       | 419 | 6          |               | ESP     | 2005 | Hospitalized patient    | Clin_Isol              | E. faecium | Blood          | 1        | 1    |      |      | 419            | 47  | 1    | 32  | 1   | 14   | 1   | 18   |     |
| 1623 | A1772       | 419 | 6          |               | ESP     | 2005 | Hospitalized patient    | Clin_Isol              | E. faecium | Blood          | 0        | 1    |      |      | 419            | 47  | 1    | 32  | 1   | 14   | 1   | 18   |     |
| 1624 | A1739       | 420 | 2          | 3             | ESP     | 2007 | Hospitalized patient    | Clin_Isol              | E. faecium | Blood          | 0        | 0    |      |      | 420            | 5   | 3    | 38  | 2   | 1    | 1   | 1    |     |
| 1625 | A1740       | 421 | 3          | 3             | USA     | 2005 |                         |                        | E. faecium |                |          |      |      |      | 421            | 3   | 2    | 1   | 6   | 1    | 7   | 1    |     |
| 1626 | A1741       | 422 | 3          | 3             | USA     | 2005 |                         |                        | E. faecium |                |          |      |      |      | 422            | 2   | 2    | 6   | 6   | 1    | 1   | 1    |     |
| 1627 | A1747       | 423 | 2          | 1             | USA     | 2005 |                         |                        | E. faecium |                |          |      |      |      | 423            | 5   | 2    | 6   | 6   | 1    | 20  | 1    |     |
| 1628 | A1748       | 424 | 2          | 1             | USA     | 2005 |                         |                        | E. faecium |                |          |      |      |      | 424            | 5   | 2    | 1   | 3   | 1    | 20  | 1    |     |
| 1629 | A1754       | 425 | 2          | 4             | ESP     | 2008 | Poultry                 | Animal_Poultry         | E. faecium | Food           | 0        | 1    |      |      | 425            | 5   | 2    | 1   | 3   | 1    | 33  | 1    |     |
| 1630 | A1755       | 426 | 3          | 3             | JPN     | 2001 | Hospitalized patient    |                        | E. faecium |                |          |      |      |      | 426            | 7   | 5    | 1   | 18  | 1    | 1   | 3    |     |
| 1631 | A1757       | 426 | 3          | 3             | JPN     | 2003 | Hospitalized patient    | Clin_Isol              | E. faecium | Urine          |          |      |      |      | 426            | 7   | 5    | 1   | 18  | 1    | 1   | 3    |     |
| 1632 | A1758       | 426 | 3          | 3             | JPN     | 2006 | Hospitalized patient    | Clin_Isol              | E. faecium | Gastric Acid   |          |      |      |      | 426            | 7   | 5    | 1   | 18  | 1    | 1   | 3    |     |
| 1633 | A1756       | 427 | 3          | 3             | JPN     | 2003 | Hospitalized patient    | Clin_Isol              | E. faecium | Vagina         |          |      |      |      | 427            | 7   | 5    | 1   | 18  | 1    | 1   | 1    |     |
| 1634 | A1760       | 428 | 5          |               | PRT     | 2006 | Pig                     | Animal_Pig             | E. faecium | Waste Lagoon   |          | 0    |      | 428  | 45             | 13  | 18   | 17  | 10  | 19   | 6   |      |     |
| 1635 | A1761       | 429 | 2          | 3             | PRT     | 2006 | Pig                     | Animal_Pig             | E. faecium | Manure         |          | 0    |      | 429  | 5              | 3   | 6    | 6   | 1   | 55   | 1   |      |     |
| 1636 | A1762       | 430 | 2          | 3             | PRT     | 2007 | Pig                     | Animal_Pig             | E. faecium | Food           |          | 1    |      | 430  | 5              | 3   | 1    | 1   | 1   | 7    | 1   |      |     |
| 1637 | A1763       | 431 | 3          | 3             | PRT     | 2007 | Pig                     | Animal_Pig             | E. faecium | Dust           |          | 1    |      | 431  | 7              | 2   | 1    | 1   | 1   | 1    | 1   | 1    |     |
| 1638 | A1764       | 432 | 3          | 2             | PRT     | 2007 | Pig                     | Animal_Pig             | E. faecium | Residual Water |          | 0    |      | 432  | 51             | 40  | 12   | 3   | 1   | 1    | 1   | 1    |     |

Supplementary Table 1. Meta-data of isolates included in this study

| No   | Strain code     | ST  | BAPS group | BAPS subgroup | country | year      | Source                  | Epidemiology            | Species    | isol_site        | esp_gene | ampR | SgrA | EcbA | Genomic island | ST | AtpA | Ddl | Gdh | PurK | Gyd | PstS | Ack |
|------|-----------------|-----|------------|---------------|---------|-----------|-------------------------|-------------------------|------------|------------------|----------|------|------|------|----------------|----|------|-----|-----|------|-----|------|-----|
| 1639 | A1765           | 433 | 3          | 4             | PRT     | 2007      | Pig                     | Animal_Pig              | E. faecium | Air              |          | 1    |      |      | 433            | 9  | 5    | 8   | 3   | 1    | 1   | 1    |     |
| 1640 | A1766           | 434 | 1          |               | PRT     | 2007      | Pig                     | Animal_Pig              | E. faecium | Air              |          | 0    |      |      | 434            | 11 | 8    | 8   | 17  | 10   | 41  | 6    |     |
| 1641 | A1767           | 435 | 3          | 1             | PRT     | 2007      | Pig                     | Animal_Pig              | E. faecium | Faeces           |          | 0    |      |      | 435            | 2  | 3    | 1   | 2   | 1    | 1   | 22   |     |
| 1642 | A1768           | 436 | 5          |               | PRT     | 2007      | Pig                     | Animal_Pig              | E. faecium | Food             |          | 0    |      |      | 436            | 52 | 3    | 1   | 2   | 1    | 1   | 1    |     |
| 1643 | A1769           | 437 | 2          | 1             | PRT     | 2007      | Pig                     | Animal_Pig              | E. faecium | Food             |          | 1    |      |      | 437            | 9  | 5    | 1   | 3   | 1    | 20  | 1    |     |
| 1644 | A1777           | 439 | 2          | 4             | USA     | 2005      |                         |                         | E. faecium |                  |          |      |      |      | 439            | 53 | 2    | 6   | 6   | 1    | 33  | 5    |     |
| 1645 | A1828           | 440 | 2          | 1             | SWE     |           | Hospitalized patient    | Clin_Isol               | E. faecium | Blood            |          |      |      |      | 440            | 43 | 1    | 1   | 1   | 12   | 1   | 1    |     |
| 1646 | A1829           | 441 | 3          | 1             | SWE     |           | Hospitalized patient    | Clin_Isol               | E. faecium | Blood            |          |      |      |      | 441            | 2  | 3    | 1   | 1   | 1    | 1   | 1    |     |
| 1647 | A1830           | 441 | 3          | 1             | SWE     |           | Hospitalized patient    | Clin_Isol               | E. faecium | Blood            |          |      |      |      | 441            | 2  | 3    | 1   | 1   | 1    | 1   | 1    |     |
| 1648 | A1837           | 442 | 2          | 1             | PRT     | 2005      | Environment             | Environment             | E. faecium | sand             |          |      |      |      | 442            | 5  | 1    | 1   | 2   | 6    | 1   | 1    |     |
| 1649 | A1838           | 442 | 2          | 1             | PRT     | 2005      | Environment             | Environment             | E. faecium | sand             |          |      |      |      | 442            | 5  | 1    | 1   | 2   | 6    | 1   | 1    |     |
| 1650 | A1839           | 443 | 2          | 3             | PRT     | 2007      | Pig                     | Animal_Pig              | E. faecium | Rectal Swab      |          |      |      |      | 443            | 9  | 4    | 12  | 1   | 1    | 20  | 5    |     |
| 1651 | A1990           | 444 | 5          |               | TWN     | 2007      | Hospitalized patient    | Hospital outbreak TWN-1 | E. faecium | urine            | 1        | 1    |      |      | 444            | 47 | 1    | 1   | 1   | 1    | 1   | 23   |     |
| 1652 | A1991           | 444 | 5          |               | TWN     | 2007      | Hospitalized patient    | Hospital outbreak TWN-2 | E. faecium | wound pus        | 1        | 1    |      |      | 444            | 47 | 1    | 1   | 1   | 1    | 1   | 23   |     |
| 1653 | A2002           | 445 | 2          | 1             | USA     | 2005      | Meat                    | Animal_Food             | E. faecium | Chicken Breast   |          |      |      |      | 445            | 9  | 2    | 6   | 6   | 1    | 20  | 1    |     |
| 1654 | A2003           | 446 | 2          | 1             | USA     | 2005      | Meat                    | Animal_Food             | E. faecium | Ground Turkey    |          |      |      |      | 446            | 9  | 2    | 1   | 3   | 1    | 1   | 1    |     |
| 1655 | A2004           | 447 | 3          | 3             | BRA     | 2006      | Hospitalized patient    | Hospital outbreak BR-2  | E. faecium | Peritoneal fluid | 1        |      |      |      | 447            | 1  | 43   | 1   | 44  | 1    | 20  | 1    |     |
| 1656 | A2006           | 447 | 3          | 3             | BRA     | 2007      | Hospitalized patient    | Hosp_Surv               | E. faecium | Rectal Swab      | 1        |      |      |      | 447            | 1  | 43   | 1   | 44  | 1    | 20  | 1    |     |
| 1657 | A2007           | 447 | 3          | 3             | BRA     | 2007      | Hospitalized patient    | Hosp_Surv               | E. faecium | Rectal Swab      | 1        |      |      |      | 447            | 1  | 43   | 1   | 44  | 1    | 20  | 1    |     |
| 1658 | A2005           | 448 | 3          | 1             | BRA     | 2008      | Hospitalized patient    | Clin_Isol               | E. faecium | Blood            | 1        |      |      |      | 448            | 1  | 3    | 1   | 44  | 1    | 20  | 1    |     |
| 1659 | A2008           | 449 | 2          | 1             | USA     | 2005      | Meat                    | Animal_Food             | E. faecium | Ground Turkey    |          |      |      |      | 449            | 5  | 2    | 1   | 45  | 1    | 14  | 1    |     |
| 1660 | A2009           | 450 | 2          | 1             | USA     | 2005      | Meat                    | Animal_Food             | E. faecium | Ground Turkey    |          |      |      |      | 450            | 9  | 2    | 1   | 3   | 1    | 7   | 1    |     |
| 1661 | A2010           | 451 | 2          | 1             | USA     | 2005      | Meat                    | Animal_Food             | E. faecium | Chicken Breast   |          |      |      |      | 451            | 5  | 2    | 6   | 3   | 1    | 1   | 1    |     |
| 1662 | A2011           | 452 | 3          | 3             | USA     | 2005      | Meat                    | Animal_Food             | E. faecium | Ground Turkey    |          |      |      |      | 452            | 2  | 2    | 1   | 3   | 1    | 7   | 5    |     |
| 1663 | E4470           | 453 | 3          | 3             | NLD     | 2008      | Dog                     | Animal_Dog              | E. faecium | Faeces           | 1        |      |      |      | 453            | 54 | 1    | 1   | 1   | 1    | 7   | 1    |     |
| 1664 | E4469           | 454 | 2          | 4             | NLD     | 2008      | Dog                     | Animal_Dog              | E. faecium | Faeces           | 1        |      |      |      | 454            | 15 | 1    | 1   | 1   | 1    | 11  | 1    |     |
| 1665 | E4471           | 455 | 3          | 5             | NLD     | 2008      | Dog                     | Animal_Dog              | E. faecium | Faeces           | 1        |      |      |      | 455            | 7  | 1    | 1   | 6   | 1    | 11  | 1    |     |
| 1666 | E4457           | 456 | 2          | 1             | NLD     | 2008      | Dog                     | Animal_Dog              | E. faecium | Faeces           | 1        |      |      |      | 456            | 5  | 1    | 1   | 2   | 1    | 57  | 1    |     |
| 1667 | E4566           | 456 | 2          | 1             | NLD     |           | Non-hospitalized person | Comm_Surv               | E. faecium | Faeces           | 1        |      |      |      | 456            | 5  | 1    | 1   | 2   | 1    | 57  | 1    |     |
| 1668 | E4592           | 456 | 2          | 1             | NLD     | 2009      | Non-hospitalized person | Comm_Surv               | E. faecium | Faeces           | 1        |      |      |      | 456            | 5  | 1    | 1   | 2   | 1    | 57  | 1    |     |
| 1669 | E4461           | 457 | 3          | 5             | NLD     | 2008      | Dog                     | Animal_Dog              | E. faecium | Faeces           | 1        |      |      |      | 457            | 7  | 1    | 1   | 1   | 1    | 58  | 1    |     |
| 1670 | E4466           | 458 | 2          | 3             | NLD     | 2008      | Dog                     | Animal_Dog              | E. faecium | Faeces           | 1        |      |      |      | 458            | 15 | 3    | 1   | 46  | 1    | 7   | 1    |     |
| 1671 | E4472           | 459 | 2          | 1             | NLD     | 2008      | Dog                     | Animal_Dog              | E. faecium | Faeces           | 1        |      |      |      | 459            | 15 | 1    | 6   | 47  | 1    | 7   | 1    |     |
| 1672 | A2018           | 460 | 3          | 3             | SWE     | 2003      | Hospitalized patient    | Clin_Isol               | E. faecium | Wound            |          |      |      |      | 460            | 1  | 42   | 1   | 1   | 1    | 1   | 1    |     |
| 1673 | A2029           | 461 | 2          | 1             | USA     | 2006      | Meat                    | Animal_Food             | E. faecium | Chicken Breast   |          |      |      |      | 461            | 5  | 2    | 6   | 32  | 1    | 7   | 1    |     |
| 1674 | A2030           | 462 | 2          | 4             | USA     | 2006      | Meat                    | Animal_Food             | E. faecium | Chicken Breast   |          |      |      |      | 462            | 5  | 2    | 6   | 6   | 1    | 33  | 1    |     |
| 1675 | A2031           | 463 | 2          | 1             | USA     | 2006      | Meat                    | Animal_Food             | E. faecium | Chicken Breast   |          |      |      |      | 463            | 9  | 2    | 6   | 6   | 1    | 16  | 1    |     |
| 1676 | A2033           | 463 | 2          | 1             | USA     | 2006      | Meat                    | Animal_Food             | E. faecium | Chicken Breast   |          |      |      |      | 463            | 9  | 2    | 6   | 6   | 1    | 16  | 1    |     |
| 1677 | A2034           | 463 | 2          | 1             | USA     | 2006      | Meat                    | Animal_Food             | E. faecium | Chicken Breast   |          |      |      |      | 463            | 9  | 2    | 6   | 6   | 1    | 16  | 1    |     |
| 1678 | A2032           | 464 | 2          | 1             | USA     | 2006      | Meat                    | Animal_Food             | E. faecium | Ground Turkey    |          |      |      |      | 464            | 5  | 2    | 6   | 3   | 1    | 7   | 5    |     |
| 1679 | A2035           | 465 | 2          | 4             | USA     | 2006      | Meat                    | Animal_Food             | E. faecium | Chicken Breast   |          |      |      |      | 465            | 53 | 2    | 6   | 3   | 1    | 33  | 5    |     |
| 1680 | A2036           | 466 | 3          | 5             | USA     | 2006      | Meat                    | Animal_Food             | E. faecium | Ground Turkey    |          |      |      |      | 466            | 2  | 2    | 6   | 3   | 1    | 11  | 1    |     |
| 1681 | A2037           | 467 | 2          | 4             | USA     | 2006      | Meat                    | Animal_Food             | E. faecium | Ground Turkey    |          |      |      |      | 467            | 5  | 18   | 24  | 6   | 2    | 33  | 1    |     |
| 1682 | A2038           | 468 | 3          | 5             | USA     | 2006      | Meat                    | Animal_Food             | E. faecium | Ground Turkey    |          |      |      |      | 468            | 2  | 3    | 1   | 2   | 1    | 33  | 1    |     |
| 1683 | A2039           | 469 | 2          | 4             | USA     | 2006      | Meat                    | Animal_Food             | E. faecium | Ground Turkey    |          |      |      |      | 469            | 9  | 4    | 6   | 1   | 1    | 33  | 1    |     |
| 1684 | A2040           | 469 | 2          | 4             | USA     | 2006      | Meat                    | Animal_Food             | E. faecium | Ground Turkey    |          |      |      |      | 469            | 9  | 4    | 6   | 1   | 1    | 33  | 1    |     |
| 1685 | A2041           | 470 | 4          |               | PRT     | 2005      | Sand                    | Environment             | E. faecium |                  | 0        |      |      |      | 470            | 25 | 13   | 34  | 48  | 19   | 26  | 6    |     |
| 1686 | A2042           | 471 | 3          | 3             | KOR     | 2008      | Hospitalized patient    | Hosp_Surv               | E. faecium | Rectal Swab      | 1        |      |      |      | 471            | 7  | 1    | 1   | 1   | 21   | 7   | 1    |     |
| 1687 | A2043           | 472 | 3          | 3             | KOR     | 2008      | Hospitalized patient    | Hosp_Surv               | E. faecium | Rectal Swab      | 1        |      |      |      | 472            | 1  | 1    | 1   | 1   | 1    | 34  | 1    |     |
| 1688 | A2055           | 473 | 1          |               | USA     | 1988      | Hospitalized patient    | Clin_Isol               | E. faecium | Urine            | 0        | 1    |      |      | 473            | 13 | 8    | 8   | 8   | 6    | 59  | 6    |     |
| 1689 | NEDH SF-76/TX20 | 473 | 1          |               | USA     | 1988      | Hospitalized patient    |                         | E. faecium |                  |          | 1    |      |      | 473            | 13 | 8    | 8   | 8   | 6    | 59  | 6    |     |
| 1690 | A2056           | 474 | 1          |               | USA     | 1987-1988 | Hospitalized patient    | Clin_Isol               | E. faecium | Blood            | 0        | 0    |      |      | 474            | 5  | 6    | 4   | 4   | 10   | 60  | 2    |     |
| 1691 | UWHC-2145/TX20  | 474 | 1          |               | USA     | 1987-1988 | Hospitalized patient    |                         | E. faecium |                  |          | 1    |      |      | 474            | 5  | 6    | 4   | 4   | 10   | 60  | 2    |     |
| 1692 | A2057           | 475 | 3          | 3             | USA     | 1993      | Hospitalized patient    | Hosp_Surv               | E. faecium | Faeces           | 0        | 0    |      |      | 475            | 1  | 44   | 1   | 1   | 1    | 1   | 1    |     |
| 1693 | SEH33/TX1399    | 475 | 3          | 3             | USA     | 1993-1994 | Hospitalized patient    |                         | E. faecium |                  |          | 1    |      |      | 475            | 1  | 44   | 1   | 1   | 1    | 1   | 1    |     |
| 1694 | A2058           | 476 | 3          | 1             | USA     | 1981-1987 | Hospitalized patient    | Clin_Isol               | E. faecium | Urine            | 0        | 1    |      |      | 476            | 3  | 3    | 6   | 2   | 1    | 1   | 1    |     |
| 1695 | RLA-1/TX2058    | 476 | 3          | 1             | USA     | 1981-87   | Hospitalized patient    |                         | E. faecium |                  |          | 1    |      |      | 476            | 3  | 3    | 6   | 2   | 1    | 1   | 1    |     |
| 1696 | RLA-2/TX2059    | 476 | 3          | 1             | USA     | 1981-87   | Hospitalized patient    |                         | E. faecium |                  |          | 1    |      |      | 476            | 3  | 3    | 6   | 2   | 1    | 1   | 1    |     |
| 1697 | RLA-3/TX2060    | 476 | 3          | 1             | USA     | 1981-87   | Hospitalized patient    |                         | E. faecium |                  |          | 1    |      |      | 476            | 3  | 3    | 6   | 2   | 1    | 1   | 1    |     |
| 1698 | E4582           | 477 | 3          | 2             | NLD     | 2009      | Cat                     | Animal_Cat              | E. faecium | Faeces           | 1        | 1    |      |      | 477            | 4  | 3    | 1   | 1   | 1    | 7   | 1    |     |
| 1699 | A2081           | 478 | 2          | 1             | BRA     | 2007      | Hospitalized patient    | Hosp_Surv               | E. faecium | Rectal Swab      | 1        |      |      |      | 478            | 15 | 43   | 1   | 44  | 1    | 20  | 1    |     |
| 1700 | A2082           | 478 | 2          | 1             | BRA     | 2007      | Hospitalized patient    | Hosp_Surv               | E. faecium | Rectal Swab      | 1        |      |      |      | 478            | 15 | 43   | 1   | 44  | 1    | 20  | 1    |     |
| 1701 | A2083           | 478 | 2          | 1             | BRA     | 2008      | Hospitalized patient    | Hospital outbreak BR-3  | E. faecium | Peritoneal fluid | 1        |      |      |      | 478            | 15 | 43   | 1   | 44  | 1    | 20  | 1    |     |
