# Supplementary material for: Restricted Gene Flow among Hospital Subpopulations of Enterococcus faecium
Source: PubMed Central journal article supplement — mBio. 2012 Jul 17;3(4):e00151-12. doi: 10.1128/mBio.00151-12 (PMC3413404; doi:10.1128/mbio.00151-12), 2012-07-17
Supplement: mbo004121294st3.pdf [file mbo004121294st3.pdf]

Supplementary table 3. Distribution of genes enriched among the three hospital lineages

| Lineage | Number (percentage) of positive isolates |                                                          |                                                                                |                                                             |                                                                |                   |                   |                                |
|---------|------------------------------------------|----------------------------------------------------------|--------------------------------------------------------------------------------|-------------------------------------------------------------|----------------------------------------------------------------|-------------------|-------------------|--------------------------------|
|         | IS16 ( <i>Efm.024E08</i> ) <sup>a</sup>  | Glycosyl hydrolase<br>( <i>Efm.024F04</i> ) <sup>a</sup> | Extracellular solute-<br>binding protein<br>( <i>Efm.047B09</i> ) <sup>a</sup> | Integrase IS30<br>fam<br>( <i>Efm.024F11</i> ) <sup>a</sup> | Hypothetical<br>protein<br>( <i>EfmP.007G12</i> ) <sup>a</sup> | SgrA <sup>b</sup> | EcbA <sup>b</sup> | Genomic<br>island <sup>c</sup> |
| 17      | 22 (100)                                 | 22 (100)                                                 | 22 (100)                                                                       | 21 (95)                                                     | 22 (100)                                                       | 21 (100)          | 18 (86)           | 24 (100)                       |
| 18      | 14 (100)                                 | 14 (100)                                                 | 14 (100)                                                                       | 12 (86)                                                     | 14 (100)                                                       | 13 (100)          | 5 (38)            | 12 (92)                        |
| 78      | 6 (75)                                   | 5 (63)                                                   | 5 (63)                                                                         | 5 (63)                                                      | 6 (75)                                                         | 8 (100)           | 5 (63)            | 5 (63)                         |
| Other   | 7 (12)                                   | 6 (10)                                                   | 6 (10)                                                                         | 14 (23)                                                     | 18 (30)                                                        | 23 (26)           | 7 (8)             | 5 (5)                          |

<sup>a</sup> gene product (Spot ID) from Leavis *et al.*, 2007 (14).

<sup>b</sup> from Hendrickx *et al.*, 2009 (21).

<sup>c</sup> from Heikens *et al.*, 2008 (24)
