# Supplementary material for: Restricted Gene Flow among Hospital Subpopulations of Enterococcus faecium
Source: PubMed Central journal article supplement — mBio. 2012 Jul 17;3(4):e00151-12. doi: 10.1128/mBio.00151-12 (PMC3413404; doi:10.1128/mbio.00151-12), 2012-07-17
Supplement: mbo004121294st4.pdf [file mbo004121294st4.pdf]

Supplementary Table 4. Distribution of STs with significant admixture among BAPS groups and source of isolation

| BAPS groups | BAPS subgroups | Number (%) of STs identified in the different source groups with significant admixture |              |                  |              |           |              |           |              |           |              |           |              | No (%) of STs with admixture in |
|-------------|----------------|----------------------------------------------------------------------------------------|--------------|------------------|--------------|-----------|--------------|-----------|--------------|-----------|--------------|-----------|--------------|---------------------------------|
|             |                | Hosp patients                                                                          |              | Non-hosp persons |              | Pets      |              | Pigs      |              | Poultry   |              | Calves    |              |                                 |
|             |                | Admixture                                                                              | No admixture | Admixture        | No admixture | Admixture | No admixture | Admixture | No admixture | Admixture | No admixture | Admixture | No admixture |                                 |
| 1           |                | 1 (4%)                                                                                 | 24           | 0                | 9            | 0         | 0            | 1 (10%)   | 9            | 0         | 0            | 0         | 0            | 2 (4%)                          |
| 2           | 1              | 2 (3%)                                                                                 | 64           | 0                | 11           | 0         | 12           | 1 (5%)    | 18           | 0         | 44           | 0         | 0            | 3 (2%)                          |
|             | 2              | 1 (100%)                                                                               | 0            | 0                | 0            | 0         | 0            | 0         | 0            | 0         | 0            | 0         | 0            | 1 (100%)                        |
|             | 3              | 0                                                                                      | 32           | 1 (12%)          | 7            | 0         | 7            | 0         | 6            | 0         | 3            | 0         | 0            | 1 (2%)                          |
|             | 4              | 4 (100%)                                                                               | 0            | 0                | 0            | 1 (100%)  | 0            | 1 (100%)  | 0            | 0         | 3            | 0         | 0            | 8 (53%)                         |
|             | Total          | 7 (7%)                                                                                 | 96           | 1 (5%)           | 18           | 1 (5%)    | 19           | 1 (4%)    | 24           | 0         | 50           | 0         | 0            | 13 (6%)                         |
| 3           | 1              | 0                                                                                      | 31           | 0                | 5            | 0         | 4            | 0         | 6            | 0         | 1            | 0         | 6            | 0 (0%)                          |
|             | 2              | 6 (100%)                                                                               | 0            | 3 (100%)         | 0            | 3 (100%)  | 0            | 7 (100%)  | 0            | 1 (100%)  | 0            | 0         | 0            | 17 (100%)                       |
|             | 3              | 2 (3%)                                                                                 | 71           | 0                | 6            | 1 (17%)   | 5            | 0         | 6            | 0         | 9            | 0         | 3            | 3 (3%)                          |
|             | 4              | 1 (100%)                                                                               | 0            | 3 (100%)         | 0            | 0         | 0            | 1 (100%)  | 0            | 0         | 0            | 0         | 0            | 4 (100%)                        |
|             | 5              | 4 (31%)                                                                                | 9            | 0                | 1            | 0         | 3            | 0         | 0            | 2 (33%)   | 2            | 0         | 0            | 5 (24%)                         |
|             | Total          | 13 (10%)                                                                               | 111          | 6 (30%)          | 12           | 4 (25%)   | 12           | 8 (40%)   | 12           | 2 (14%)   | 12           | 0         | 9            | 29 (15%)                        |
| 4           |                | 1                                                                                      | 5            | 0                | 1            | 0         | 0            | 0         | 0            | 0         | 0            | 0         | 0            | 2 (22%)                         |
| 5           |                | 2                                                                                      | 3            | 0                | 0            | 0         | 0            | 1 (50%)   | 1            | 1 (50%)   | 1            | 0         | 0            | 3 (33%)                         |
| 6           |                | 0                                                                                      | 2            | 0                | 0            | 0         | 0            | 0         | 0            | 0         | 0            | 0         | 0            | 0 (0%)                          |
| 7           |                | 0                                                                                      | 7            | 0                | 0            | 0         | 0            | 0         | 0            | 0         | 0            | 0         | 0            | 0 (0%)                          |
| Total       |                | 24 (9%)                                                                                | 248          | 7 (15%)          | 40           | 5 (14%)   | 31           | 12 (21%)  | 46           | 3 (5%)    | 63           | 0         | 9            |                                 |
